# Supplementary material for: Genetic analysis of a bronze age individual from Ulug-depe (Turkmenistan)
Source: Front Genet. 2022 Aug 22;13:884612. doi: 10.3389/fgene.2022.884612 (PMC9441711; doi:10.3389/fgene.2022.884612)
Supplement: Supplementary file 7 [file Table4.XLSX]

## Sheet: Table S6
Table S6	all f3-outgroup of the form f3(ULG75 or BMAC population, Ancient pop; Outgroup)
ULG75/BMAC	Ancient Population	Outgroup	f3	SE	SNPs
ULG75	Anatolia_C	Mbuti.DG	0.25002	0.005168	45141
ULG75	Armenia_C	Mbuti.DG	0.253903	0.003752	82933
ULG75	Bulgaria_C	Mbuti.DG	0.250323	0.003672	86545
ULG75	Bulgaria_C_published	Mbuti.DG	0.259153	0.01094	7634
ULG75	Bulgaria_Varna_C	Mbuti.DG	0.244325	0.005258	35940
ULG75	Hungary_C_Balaton_Lasinja	Mbuti.DG	0.250502	0.003967	73706
ULG75	Hungary_C_Balaton_Lasinja_published	Mbuti.DG	0.251751	0.004767	64022
ULG75	Hungary_EarlyC_Tiszapolgar	Mbuti.DG	0.253243	0.00471	48338
ULG75	Hungary_EarlyC_Tiszapolgar_Bodrogkeresztur_published	Mbuti.DG	0.251603	0.004602	63236
ULG75	Hungary_LateC_Baden	Mbuti.DG	0.249227	0.003574	89102
ULG75	Hungary_LateC_Baden_published	Mbuti.DG	0.251378	0.004038	73281
ULG75	Hungary_LateC_Protoboleraz	Mbuti.DG	0.249125	0.004055	69647
ULG75	Hungary_LateC_Protoboleraz_published	Mbuti.DG	0.248557	0.003931	78456
ULG75	Iberia_C	Mbuti.DG	0.249783	0.003498	98356
ULG75	Iberia_C.SG	Mbuti.DG	0.2482	0.00363	92411
ULG75	Iberia_C_BA	Mbuti.DG	0.246891	0.005222	46297
ULG75	Iberia_C_BA_published	Mbuti.DG	0.260118	0.011042	7354
ULG75	Iberia_C_published	Mbuti.DG	0.252001	0.004491	61433
ULG75	Tajikistan_C_Sarazm	Mbuti.DG	0.263915	0.004336	67285
ULG75	Turkmenistan_C_Geoksyur	Mbuti.DG	0.262132	0.003624	84840
ULG75	Iran_C_HajjiFiruz	Mbuti.DG	0.253205	0.003808	81969
ULG75	Iran_C_SehGabi	Mbuti.DG	0.25747	0.003737	82024
ULG75	Iran_C_TepeHissar	Mbuti.DG	0.263268	0.003778	81834
ULG75	Iran_C_TepeHissar_published	Mbuti.DG	0.262389	0.008408	14253
ULG75	Israel_C	Mbuti.DG	0.244495	0.003493	89037
ULG75	Israel_C_published	Mbuti.DG	0.249613	0.006879	20383
ULG75	Italy_C.SG	Mbuti.DG	0.249848	0.003662	88017
ULG75	Italy_C_BA.SG	Mbuti.DG	0.251182	0.003668	89278
ULG75	Italy_North_Remedello_C.SG	Mbuti.DG	0.253749	0.004876	46422
ULG75	Italy_Sicily_C_o	Mbuti.DG	0.256334	0.01584	3235
ULG75	Romania_C	Mbuti.DG	0.247217	0.004177	68444
ULG75	Romania_C.SG	Mbuti.DG	0.242347	0.004271	82633
ULG75	Sweden_BAC	Mbuti.DG	0.249208	0.004251	75212
ULG75	Sweden_BattleAxe.SG	Mbuti.DG	0.252304	0.005195	45775
ULG75	Sweden_FBC	Mbuti.DG	0.247359	0.005014	44533
ULG75	Turkmenistan_C_Geoksyur_published	Mbuti.DG	0.269659	0.009716	10084
ULG75	Turkmenistan_C_Namazga.SG	Mbuti.DG	0.264282	0.004943	46957
ULG75	Turkmenistan_C_Namazga_o.SG	Mbuti.DG	0.262994	0.005763	31729
ULG75	Turkmenistan_C_Parkhai	Mbuti.DG	0.260215	0.003888	79986
ULG75	Turkmenistan_C_TepeAnau	Mbuti.DG	0.261578	0.004122	74231
ULG75	Wales_C	Mbuti.DG	0.251912	0.005363	40654
ULG75	Wales_C.SG	Mbuti.DG	0.250419	0.005271	40497
ULG75	Anatolia_EBA	Mbuti.DG	0.25266	0.003924	81563
ULG75	Anatolia_EBA.SG	Mbuti.DG	0.255587	0.004033	77259
ULG75	Armenia_Caucasus_EBA_KuraAraxes	Mbuti.DG	0.257768	0.005063	46742
ULG75	Armenia_EBA	Mbuti.DG	0.257264	0.003817	79896
ULG75	Bulgaria_BeliBreyag_EBA	Mbuti.DG	0.248915	0.005989	29258
ULG75	Bulgaria_EBA	Mbuti.DG	0.250321	0.003839	78700
ULG75	Bulgaria_EBA_Ezero	Mbuti.DG	0.257544	0.012733	5415
ULG75	Bulgaria_EBA_published	Mbuti.DG	0.254656	0.005018	47961
ULG75	Bulgaria_EBA_Yamnaya_o	Mbuti.DG	0.244935	0.00606	29103
ULG75	Croatia_LateC_EBA_Vucedol	Mbuti.DG	0.257533	0.00565	34842
ULG75	Croatia_MBA	Mbuti.DG	0.254586	0.004244	67092
ULG75	Czech_BA	Mbuti.DG	0.253166	0.004709	64244
ULG75	Czech_BellBeaker	Mbuti.DG	0.252085	0.003392	99834
ULG75	Czech_EBA	Mbuti.DG	0.252544	0.003623	88849
ULG75	Czech_EBA_Protounetice	Mbuti.DG	0.244465	0.011219	6942
ULG75	Czech_EBA_Unetice	Mbuti.DG	0.243655	0.005371	33695
ULG75	Denmark_BA.SG	Mbuti.DG	0.256196	0.009335	9652
ULG75	England_BellBeaker	Mbuti.DG	0.254043	0.003405	98995
ULG75	England_BellBeaker_published	Mbuti.DG	0.24333	0.011056	7723
ULG75	England_C_EBA	Mbuti.DG	0.252629	0.003489	93618
ULG75	England_C_EBA_published	Mbuti.DG	0.272502	0.011356	6882
ULG75	Estonia_BA.SG	Mbuti.DG	0.251478	0.003874	81352
ULG75	Estonia_BA_o.SG	Mbuti.DG	0.262627	0.026124	1235
ULG75	France_BellBeaker	Mbuti.DG	0.254114	0.003922	77038
ULG75	France_BellBeaker_lowSteppe	Mbuti.DG	0.247636	0.004714	57463
ULG75	France_BellBeaker_published	Mbuti.DG	0.245679	0.010584	8704
ULG75	Germany_BA.SG	Mbuti.DG	0.238822	0.009685	8607
ULG75	Germany_BellBeaker	Mbuti.DG	0.251329	0.003405	99500
ULG75	Germany_BellBeaker_published	Mbuti.DG	0.256396	0.005962	27398
ULG75	Germany_EBA_Unetice	Mbuti.DG	0.2501	0.003773	82857
ULG75	Germany_EBA_Unetice_published	Mbuti.DG	0.259928	0.004575	61389
ULG75	Germany_Lech_BellBeaker	Mbuti.DG	0.250706	0.003766	82619
ULG75	Germany_Lech_EBA	Mbuti.DG	0.250444	0.003531	95010
ULG75	Gibraltar_BA	Mbuti.DG	0.250459	0.005041	45148
ULG75	Greece_Crete_Armenoi	Mbuti.DG	0.236586	0.014874	3800
ULG75	Greece_Minoan_Lassithi	Mbuti.DG	0.250489	0.003778	80294
ULG75	Greece_Minoan_Odigitria	Mbuti.DG	0.243168	0.006588	20702
ULG75	Hungary_EBA_BellBeaker	Mbuti.DG	0.249727	0.003565	90451
ULG75	Hungary_EBA_BellBeaker_o	Mbuti.DG	0.239798	0.004483	65103
ULG75	Hungary_EBA_Mako	Mbuti.DG	0.249238	0.004665	61144
ULG75	Hungary_EBA_Protonagyrev	Mbuti.DG	0.253815	0.004545	61432
ULG75	Hungary_LC_EBA_Baden_Yamnaya	Mbuti.DG	0.245818	0.004104	69012
ULG75	Hungary_Maros_EBA.SG	Mbuti.DG	0.246944	0.005396	34472
ULG75	Kazakhstan_EBA_Yamnaya.SG	Mbuti.DG	0.255206	0.004214	84552
ULG75	Kazakhstan_Mereke_MBA	Mbuti.DG	0.255402	0.003948	76610
ULG75	Iberia_BA	Mbuti.DG	0.249137	0.003478	96200
ULG75	Iberia_BA.SG	Mbuti.DG	0.251786	0.004143	77792
ULG75	Iberia_BA_Cogotas	Mbuti.DG	0.249819	0.004935	41604
ULG75	Iberia_BA_published	Mbuti.DG	0.25657	0.005973	31715
ULG75	Iberia_BellBeaker	Mbuti.DG	0.251328	0.003618	90698
ULG75	Iberia_BellBeaker_o	Mbuti.DG	0.243865	0.018688	2567
ULG75	Iberia_BellBeaker_o_published	Mbuti.DG	0.211599	0.00489	52535
ULG75	Iberia_BellBeaker_published	Mbuti.DG	0.251958	0.007787	14919
ULG75	Iberia_EBA	Mbuti.DG	0.248518	0.005501	39534
ULG75	Iberia_North_BA_Africa_published	Mbuti.DG	0.240265	0.006075	28401
ULG75	Iran_BA_HajjiFiruz	Mbuti.DG	0.256908	0.004609	66783
ULG75	Iran_BA2_ShahrISokhta	Mbuti.DG	0.252306	0.004944	46863
ULG75	Iran_BA2_ShahrISokhta_published	Mbuti.DG	0.248636	0.004123	67603
ULG75	Ireland_BA.SG	Mbuti.DG	0.251284	0.003795	89560
ULG75	Italy_North_BellBeaker	Mbuti.DG	0.253413	0.004102	72077
ULG75	Italy_North_Remedello_EBA.SG	Mbuti.DG	0.242645	0.008118	14462
ULG75	Jordan_EBA	Mbuti.DG	0.246375	0.003893	70933
ULG75	Kazakhstan_BA_Zevakinskiy	Mbuti.DG	0.254153	0.005066	47156
ULG75	Kazakhstan_Botai.SG	Mbuti.DG	0.248706	0.004447	77026
ULG75	Kazakhstan_CentralSteppe_EMBA.SG	Mbuti.DG	0.244113	0.003728	87831
ULG75	Kazakhstan_Eneolithic_Botai.SG	Mbuti.DG	0.251698	0.003977	87798
ULG75	Kazakhstan_Georgievsky_MBA_published	Mbuti.DG	0.245079	0.005302	47163
ULG75	Kazakhstan_Chanchar_MBA_published	Mbuti.DG	0.252609	0.004775	56438
ULG75	Kazakhstan_Dali_EBA	Mbuti.DG	0.248224	0.004927	59627
ULG75	Russia_Afanasievo	Mbuti.DG	0.256659	0.003546	97394
ULG75	Russia_Afanasievo.SG	Mbuti.DG	0.254144	0.004347	66957
ULG75	Kazakhstan_Kanai_MBA	Mbuti.DG	0.242392	0.009539	10726
ULG75	Kazakhstan_Kumsay_EBA	Mbuti.DG	0.257294	0.003978	77005
ULG75	Russia_Caucasus_EBA_Yamnaya	Mbuti.DG	0.255669	0.004405	64463
ULG75	Russia_EBA_Yamnaya_Kalmykia.SG	Mbuti.DG	0.25218	0.003972	84703
ULG75	Russia_EBA_Yamnaya_Samara	Mbuti.DG	0.256134	0.003656	89671
ULG75	Russia_EBA_Yamnaya_Samara_published2	Mbuti.DG	0.254421	0.00439	80299
ULG75	Russia_Kalmykia_EBA_Yamnaya.SG	Mbuti.DG	0.25198	0.005789	35234
ULG75	Ukraine_BA_Catacomb.SG	Mbuti.DG	0.24438	0.008508	12908
ULG75	Ukraine_EBA_Yamnaya	Mbuti.DG	0.255359	0.004741	61719
ULG75	Ukraine_EBA_Yamnaya.SG	Mbuti.DG	0.256726	0.00913	10367
ULG75	Ukraine_EBA_Yamnaya_published	Mbuti.DG	0.272305	0.015675	3679
ULG75	Ukraine_Ozera_EBA_Yamnaya	Mbuti.DG	0.250374	0.005482	46701
ULG75	Latvia_BA	Mbuti.DG	0.252123	0.003656	89455
ULG75	Nepal_Chokhopani_2700BP.SG	Mbuti.DG	0.220439	0.004117	84685
ULG75	Nepal_Mebrak_2125BP.SG	Mbuti.DG	0.219128	0.004726	58058
ULG75	Netherlands_BA	Mbuti.DG	0.251914	0.004157	68327
ULG75	Netherlands_BellBeaker	Mbuti.DG	0.254885	0.003736	83928
ULG75	Netherlands_BellBeaker_published	Mbuti.DG	0.242455	0.019393	2248
ULG75	Poland_BellBeaker	Mbuti.DG	0.253184	0.003853	79824
ULG75	Poland_BellBeaker_published	Mbuti.DG	0.256797	0.009858	8356
ULG75	Poland_CWC_o.SG	Mbuti.DG	0.24952	0.003949	86098
ULG75	Poland_EBA	Mbuti.DG	0.250982	0.004813	60962
ULG75	Poland_EBA.SG	Mbuti.DG	0.25387	0.004339	77787
ULG75	Poland_Unetice_EBA.SG	Mbuti.DG	0.250189	0.004613	56159
ULG75	Russia_BA_Okunevo.SG	Mbuti.DG	0.243983	0.003477	96006
ULG75	Russia_Caucasus_KuraAraxes	Mbuti.DG	0.257224	0.004461	60594
ULG75	Russia_Caucasus_LateMaikop	Mbuti.DG	0.257512	0.004772	61653
ULG75	Russia_Caucasus_Maikop	Mbuti.DG	0.252906	0.005839	32323
ULG75	Russia_Caucasus_Maikop_Novosvobodnaya	Mbuti.DG	0.258916	0.004382	60815
ULG75	Russia_EBA.SG	Mbuti.DG	0.254607	0.007553	16849
ULG75	Russia_Kurma_EBA.SG	Mbuti.DG	0.23146	0.004843	51316
ULG75	Russia_Kurma_EBA_o.SG	Mbuti.DG	0.226656	0.008236	11807
ULG75	Russia_LateMaikop	Mbuti.DG	0.260547	0.004954	56096
ULG75	Russia_Shamanka_EBA.SG	Mbuti.DG	0.232774	0.003977	79427
ULG75	Russia_Steppe_Maikop	Mbuti.DG	0.254596	0.003867	80100
ULG75	Russia_Steppe_Maikop_o	Mbuti.DG	0.255995	0.005255	40786
ULG75	Russia_UstIda_EBA.SG	Mbuti.DG	0.232683	0.004292	64577
ULG75	Scotland_BellBeaker	Mbuti.DG	0.254724	0.004269	65305
ULG75	Scotland_C_EBA	Mbuti.DG	0.25232	0.003861	77063
ULG75	Scotland_C_EBA_published	Mbuti.DG	0.25152	0.005004	48510
ULG75	Switzerland_BellBeaker	Mbuti.DG	0.253897	0.006954	21484
ULG75	Iran_BA1_ShahrISokhta	Mbuti.DG	0.257932	0.003907	77327
ULG75	Iran_BA3_ShahrISokhta	Mbuti.DG	0.23693	0.012249	5742
ULG75	Tajikistan_BA_DashtiKozy	Mbuti.DG	0.256357	0.003959	77576
ULG75	Turkmenistan_EBA_Parkhai	Mbuti.DG	0.253276	0.004644	65647
ULG75	Turkmenistan_Gonur_BA_1	Mbuti.DG	0.260617	0.003818	77512
ULG75	Turkmenistan_Gonur_BA_1_o	Mbuti.DG	0.25601	0.006953	19070
ULG75	Turkmenistan_Gonur_BA_1_o2	Mbuti.DG	0.256922	0.013013	4595
ULG75	Turkmenistan_Gonur_BA_3	Mbuti.DG	0.246739	0.00968	8508
ULG75	Turkmenistan_Gonur_BA_2	Mbuti.DG	0.252096	0.006445	24859
ULG75	Turkmenistan_Gonur_BA_2_published	Mbuti.DG	0.248902	0.00788	16735
ULG75	Turkmenistan_Gonur_BA_4	Mbuti.DG	0.252951	0.011238	8215
ULG75	Turkmenistan_Gonur_BA_published	Mbuti.DG	0.216625	0.06082	222
ULG75	Uzbekistan_BA_Bustan	Mbuti.DG	0.256805	0.003971	77857
ULG75	Uzbekistan_BA_Bustan_o1	Mbuti.DG	0.25614	0.004695	52858
ULG75	Uzbekistan_BA_Bustan_o2	Mbuti.DG	0.250195	0.004797	58864
ULG75	Uzbekistan_BA_Dzharkutan1	Mbuti.DG	0.259773	0.003685	86892
ULG75	Uzbekistan_BA_Dzharkutan2	Mbuti.DG	0.251142	0.004013	76412
ULG75	Uzbekistan_BA_Kashkarchi	Mbuti.DG	0.251741	0.004579	60277
ULG75	Ukraine_EBA_GlobularAmphora	Mbuti.DG	0.245306	0.00431	69180
ULG75	Ukraine_EBA_published	Mbuti.DG	0.254069	0.005058	45872
ULG75	UstBelaya_EBA.SG	Mbuti.DG	0.232694	0.003825	87134
ULG75	Uzbekistan_BA_Kokcha	Mbuti.DG	0.251119	0.004337	71730
ULG75	Uzbekistan_BA_SappaliTepe	Mbuti.DG	0.255963	0.0035	94210
ULG75	Uzbekistan_BA_SappaliTepe_o	Mbuti.DG	0.25776	0.006338	26338
ULG75	Uzbekistan_BA_SappaliTepe2	Mbuti.DG	0.253608	0.004178	74200
ULG75	Wales_C_EBA	Mbuti.DG	0.256262	0.005828	31744
ULG75	Wales_EBA_published	Mbuti.DG	0.247295	0.01183	6239
ULG75	Anatolia_Ottoman_1.SG	Mbuti.DG	0.236362	0.005236	41121
ULG75	Anatolia_Ottoman_2.SG	Mbuti.DG	0.253439	0.007823	15894
ULG75	Czech_EarlySlav.SG	Mbuti.DG	0.251002	0.014082	4497
ULG75	England_Roman.SG	Mbuti.DG	0.251592	0.003552	92220
ULG75	England_Roman_MiddleEast.SG	Mbuti.DG	0.23823	0.004877	57370
ULG75	England_Saxon.SG	Mbuti.DG	0.252521	0.003548	96284
ULG75	Estonia_Medieval.SG	Mbuti.DG	0.251172	0.004295	62304
ULG75	Finland_Levanluhta	Mbuti.DG	0.242724	0.005162	44420
ULG75	Finland_Levanluhta_B	Mbuti.DG	0.243687	0.007266	17439
ULG75	Germany_EMedieval.SG	Mbuti.DG	0.252821	0.003431	96671
ULG75	Germany_LRoman.SG	Mbuti.DG	0.252445	0.00421	79172
ULG75	Hungary_Langobard	Mbuti.DG	0.252895	0.003521	95628
ULG75	Hungary_Langobard.SG	Mbuti.DG	0.253021	0.003445	98509
ULG75	Hungary_Medieval.SG	Mbuti.DG	0.255033	0.006253	26275
ULG75	Iberia_Carolingian	Mbuti.DG	0.252824	0.005307	36220
ULG75	Iberia_Hellenistic	Mbuti.DG	0.250102	0.004129	70881
ULG75	Iberia_Hellenistic_B	Mbuti.DG	0.249574	0.005364	32866
ULG75	Iberia_Islamic	Mbuti.DG	0.241807	0.00376	78788
ULG75	Iberia_LRoman_Medieval	Mbuti.DG	0.253907	0.011074	7193
ULG75	Iberia_Medieval	Mbuti.DG	0.244777	0.004551	61793
ULG75	Iberia_Medieval_published	Mbuti.DG	0.251778	0.005062	41070
ULG75	Iberia_Muslim_Almohade	Mbuti.DG	0.240137	0.005471	37824
ULG75	Iberia_Muslim_Emirate	Mbuti.DG	0.269923	0.01261	5214
ULG75	Iberia_Muslim_published	Mbuti.DG	0.193572	0.010441	6770
ULG75	Iberia_Muslim_Zira	Mbuti.DG	0.238894	0.004034	74737
ULG75	Iberia_NazariPeriod_LateMuslim	Mbuti.DG	0.238889	0.007152	17887
ULG75	Iberia_NazariPeriod_Muslim	Mbuti.DG	0.241227	0.003856	71621
ULG75	Iberia_NazariPeriod_Muslim_African	Mbuti.DG	0.163248	0.009522	7940
ULG75	Iberia_NazariPeriod_Muslim_o_published	Mbuti.DG	0.233543	0.010459	7946
ULG75	Iberia_NazariPeriod_Muslim_published	Mbuti.DG	0.237352	0.013701	4323
ULG75	Iberia_Roman	Mbuti.DG	0.243534	0.003731	85305
ULG75	Iberia_Roman_o	Mbuti.DG	0.246036	0.004278	71422
ULG75	Iberia_Roman_o_published	Mbuti.DG	0.267556	0.022597	1662
ULG75	Iberia_Roman_published	Mbuti.DG	0.257169	0.01375	4478
ULG75	Iberia_Visigoth_Barcelona	Mbuti.DG	0.253123	0.005143	36752
ULG75	Iberia_Visigoth_Girona	Mbuti.DG	0.253771	0.004151	67994
ULG75	Iberia_Visigoth_Girona_o_published	Mbuti.DG	0.229213	0.018	2429
ULG75	Iberia_Visigoth_Girona_published	Mbuti.DG	0.246741	0.007452	18776
ULG75	Iberia_Visigoth_Granada	Mbuti.DG	0.241618	0.00383	77029
ULG75	Iberia_Visigoth_Granada_o_published	Mbuti.DG	0.264016	0.009568	9839
ULG75	Iberia_Visigoth_Granada_published	Mbuti.DG	0.245876	0.011661	5662
ULG75	Iceland_Early_Christian.SG	Mbuti.DG	0.259662	0.004843	49424
ULG75	Iceland_Pre_Christian.SG	Mbuti.DG	0.2545	0.003543	98763
ULG75	India_RoopkundA	Mbuti.DG	0.241767	0.003577	86265
ULG75	India_RoopkundB	Mbuti.DG	0.251104	0.003616	87919
ULG75	India_RoopkundC	Mbuti.DG	0.226053	0.005748	32054
ULG75	Indian_GreatAndaman_100BP.SG	Mbuti.DG	0.21686	0.004369	83674
ULG75	Iran_Historic_GanjDareh	Mbuti.DG	0.249638	0.004677	59932
ULG75	Italy_Imperial.SG	Mbuti.DG	0.251836	0.003323	104383
ULG75	Italy_Imperial_oAfrican.SG	Mbuti.DG	0.230419	0.004462	68418
ULG75	Italy_Imperial_oCentralEuropean.SG	Mbuti.DG	0.245269	0.003936	76644
ULG75	Italy_LA.SG	Mbuti.DG	0.251252	0.003352	99104
ULG75	Italy_LA_oCentralEuropean.SG	Mbuti.DG	0.250653	0.003498	93425
ULG75	Italy_LA_oSardiniaLike.SG	Mbuti.DG	0.251238	0.005037	52145
ULG75	Italy_Medieval_EarlyModern.SG	Mbuti.DG	0.251722	0.003363	99955
ULG75	Italy_Medieval_EarlyModern_oCentralEuropean.SG	Mbuti.DG	0.249972	0.003428	97395
ULG75	Italy_North_EarlyMedieval_Langobards	Mbuti.DG	0.252735	0.003428	96792
ULG75	Kazakhstan_His.SG	Mbuti.DG	0.249557	0.010247	7782
ULG75	Kazakhstan_Kangju.SG	Mbuti.DG	0.25279	0.003723	86855
ULG75	Kazakhstan_Karakhanid.SG	Mbuti.DG	0.237266	0.004073	71054
ULG75	Kazakhstan_Karluk.SG	Mbuti.DG	0.239593	0.003904	84503
ULG75	Kazakhstan_Kimak.SG	Mbuti.DG	0.252611	0.007515	15205
ULG75	Kazakhstan_GoldenHordeAsian.SG	Mbuti.DG	0.225413	0.004303	79651
ULG75	Kazakhstan_Kipchak1.SG	Mbuti.DG	0.242437	0.004638	56140
ULG75	Kazakhstan_Kipchak2.SG	Mbuti.DG	0.239653	0.004528	67077
ULG75	Kazakhstan_OutTianShanHun.SG	Mbuti.DG	0.225108	0.005896	27641
ULG75	Kazakhstan_OutTurk.SG	Mbuti.DG	0.261997	0.005231	43536
ULG75	Kazakhstan_Turk.SG	Mbuti.DG	0.24261	0.004123	76864
ULG75	Kazakhstan_Wusun.SG	Mbuti.DG	0.254224	0.004038	79653
ULG75	Kazakhstan_Wusun_2.SG	Mbuti.DG	0.251501	0.004714	47595
ULG75	Kyrgyzstan_Nomad_modern.SG	Mbuti.DG	0.253109	0.004718	51250
ULG75	Kyrgyzstan_TianShanHun.SG	Mbuti.DG	0.24556	0.003414	99277
ULG75	Kyrgyzstan_Turk.SG	Mbuti.DG	0.241638	0.006413	26174
ULG75	Kazakhstan_Medieval_Nomad.SG	Mbuti.DG	0.23579	0.004078	76618
ULG75	Kazakhstan_GoldenHordeEuro.SG	Mbuti.DG	0.255329	0.004637	49230
ULG75	Kazakhstan_Nomad_HP.SG	Mbuti.DG	0.228363	0.003939	83773
ULG75	Kazakhstan_Nomad_Hun_Sarmatian.SG	Mbuti.DG	0.228981	0.004213	72526
ULG75	Kyrgyzstan_Medieval_Nomad.SG	Mbuti.DG	0.230544	0.003687	85891
ULG75	Lebanon_Medieval.SG	Mbuti.DG	0.247782	0.003886	86413
ULG75	Lebanon_Medieval_o1.SG	Mbuti.DG	0.237103	0.004371	79237
ULG75	Lebanon_Medieval_o2.SG	Mbuti.DG	0.251844	0.004885	55368
ULG75	Lebanon_Medieval_o3.SG	Mbuti.DG	0.257604	0.005778	30188
ULG75	Lebanon_Medieval_o4.SG	Mbuti.DG	0.25305	0.004412	82672
ULG75	Lebanon_Medieval_o6.SG	Mbuti.DG	0.248917	0.006144	27367
ULG75	Lebanon_Roman.SG	Mbuti.DG	0.247646	0.003618	86040
ULG75	Lithuania_Late_Antiquity.SG	Mbuti.DG	0.241514	0.010005	8005
ULG75	Pakistan_H_Aligrama	Mbuti.DG	0.246159	0.003667	85828
ULG75	Pakistan_H_Barikot	Mbuti.DG	0.249484	0.003875	79846
ULG75	Pakistan_H_Butkara	Mbuti.DG	0.245805	0.004149	71228
ULG75	Pakistan_H_SaiduSharif	Mbuti.DG	0.247625	0.003526	94471
ULG75	Pakistan_H_SaiduSharif_o	Mbuti.DG	0.240582	0.004484	65038
ULG75	Pakistan_Medieval_Barikot2	Mbuti.DG	0.243417	0.004543	67950
ULG75	Pakistan_Medieval_Parwak	Mbuti.DG	0.240355	0.010839	6807
ULG75	Pakistan_Medieval_RajaGira	Mbuti.DG	0.246139	0.004479	66933
ULG75	Pakistan_Medieval_Singoor	Mbuti.DG	0.244077	0.00516	41286
ULG75	Pakistan_Medieval_Udegram_Ghaznavid	Mbuti.DG	0.255939	0.005095	47676
ULG75	Russia_Alan.SG	Mbuti.DG	0.256282	0.003767	89107
ULG75	Russia_Alan_o.SG	Mbuti.DG	0.245806	0.011452	6818
ULG75	Russia_Chalmny_Varre	Mbuti.DG	0.242496	0.00436	61240
ULG75	Russia_Medieval_Nomad.SG	Mbuti.DG	0.237893	0.004587	51003
ULG75	Russia_Medieval_UstBelaya_Angara	Mbuti.DG	0.237001	0.007024	20380
ULG75	Russia_OldBeringSea_Ekven	Mbuti.DG	0.230543	0.003615	93459
ULG75	Russia_OldBeringSea_Uelen	Mbuti.DG	0.233609	0.004065	78932
ULG75	Russia_OldBeringSea_Uelen_published	Mbuti.DG	0.228088	0.005538	41687
ULG75	Russia_SaltovoMayaki.SG	Mbuti.DG	0.256313	0.010114	7508
ULG75	Serbia_Medieval_Gepidian.SG	Mbuti.DG	0.235351	0.005973	29230
ULG75	Slovakia_Poprad.SG	Mbuti.DG	0.25326	0.005534	35749
ULG75	Sweden_Viking.SG	Mbuti.DG	0.252034	0.003515	98373
ULG75	UstBelaya_MED.SG	Mbuti.DG	0.217011	0.010362	7662
ULG75	Yana_Medieval.SG	Mbuti.DG	0.233562	0.004177	69910
ULG75	Anatolia_IA.SG	Mbuti.DG	0.251389	0.005034	41320
ULG75	Bulgaria_IA	Mbuti.DG	0.249864	0.004908	54650
ULG75	Croatia_EIA	Mbuti.DG	0.249631	0.004676	60955
ULG75	Czech_HallstattBylany.SG	Mbuti.DG	0.251429	0.004555	49751
ULG75	Ekven_IA.SG	Mbuti.DG	0.230495	0.003727	90828
ULG75	England_IA.SG	Mbuti.DG	0.254625	0.005101	44896
ULG75	England_LIA.SG	Mbuti.DG	0.254003	0.004085	85854
ULG75	England_LIA_ERoman.SG	Mbuti.DG	0.252119	0.005017	48527
ULG75	Estonia_IA.SG	Mbuti.DG	0.24977	0.004103	67530
ULG75	Hungary_AvarPeriod	Mbuti.DG	0.252231	0.004771	61234
ULG75	Hungary_AvarPeriod.SG	Mbuti.DG	0.247091	0.004199	84620
ULG75	Iberia_Celtiberian	Mbuti.DG	0.250678	0.004152	73508
ULG75	Iberia_Greek	Mbuti.DG	0.253904	0.006361	23861
ULG75	Iberia_Greek1	Mbuti.DG	0.247848	0.016547	3216
ULG75	Iberia_Greek2	Mbuti.DG	0.240349	0.004553	60958
ULG75	Iberia_IA	Mbuti.DG	0.24886	0.004249	67718
ULG75	Iberia_IA_PreIberian_published	Mbuti.DG	0.247522	0.009942	10080
ULG75	Iberia_Iberian	Mbuti.DG	0.250782	0.004217	63191
ULG75	Iberia_Iberian_published	Mbuti.DG	0.249987	0.004902	45857
ULG75	Ibiza_Punic.SG	Mbuti.DG	0.247039	0.006538	25263
ULG75	Iran_IA_HajjiFiruz	Mbuti.DG	0.254429	0.005558	37095
ULG75	Iran_IA_Hasanlu.SG	Mbuti.DG	0.249604	0.004442	73146
ULG75	Israel_IA1_Ashkelon	Mbuti.DG	0.251189	0.005537	34839
ULG75	Israel_IA2_Ashkelon	Mbuti.DG	0.244306	0.004977	41515
ULG75	Italy_IA_Republic.SG	Mbuti.DG	0.251841	0.003415	94060
ULG75	Italy_IA_Republic_oEasternMediterranean.SG	Mbuti.DG	0.247412	0.003846	84707
ULG75	Kazakhstan_IA_Berel_Pazyryk	Mbuti.DG	0.24115	0.004008	79856
ULG75	Kazakhstan_IA_Chanchar_published	Mbuti.DG	0.248407	0.00476	55069
ULG75	Kazakhstan_IA_Tasbas	Mbuti.DG	0.250211	0.005456	39538
ULG75	Kazakhstan_IA_ZevakinoChilikta_1.SG	Mbuti.DG	0.250835	0.009318	10807
ULG75	Kazakhstan_IA_ZevakinoChilikta_2.SG	Mbuti.DG	0.238244	0.006531	22873
ULG75	Kazakhstan_CentralTasmola_o1.SG	Mbuti.DG	0.242112	0.01076	6728
ULG75	Kazakhstan_CentralTasmola_o2.SG	Mbuti.DG	0.269103	0.023077	1687
ULG75	Kazakhstan_EIA_Birlik.SG	Mbuti.DG	0.259736	0.019287	1977
ULG75	Kazakhstan_LIA_Georgievsky_published	Mbuti.DG	0.247382	0.004897	55479
ULG75	Kazakhstan_Nomad_IA.SG	Mbuti.DG	0.246536	0.003944	85601
ULG75	Kazakhstan_TianShanSaka.SG	Mbuti.DG	0.257104	0.012985	5120
ULG75	Hungary_Prescythian_IA.SG	Mbuti.DG	0.24316	0.004425	57883
ULG75	Hungary_Scythian.SG	Mbuti.DG	0.252144	0.003793	81486
ULG75	Kazakhstan_Sarmatian.SG	Mbuti.DG	0.253015	0.004166	64320
ULG75	Kyrgyzstan_OutTianShanSaka.SG	Mbuti.DG	0.2469	0.0047	59017
ULG75	Moldova_Cimmerian.SG	Mbuti.DG	0.241405	0.004521	56722
ULG75	Kyrgyzstan_TianShanSaka.SG	Mbuti.DG	0.251869	0.003669	90059
ULG75	Russia_Tagar.SG	Mbuti.DG	0.249767	0.003646	91992
ULG75	Moldova_Scythian.SG	Mbuti.DG	0.251796	0.003854	84582
ULG75	Moldova_Scythian_o1.SG	Mbuti.DG	0.236644	0.016994	2649
ULG75	Moldova_Scythian_o2.SG	Mbuti.DG	0.250779	0.004829	58345
ULG75	Mongolia_XiongNu_WE.SG	Mbuti.DG	0.241953	0.004271	78172
ULG75	Russia_Early_Sarmatian.SG	Mbuti.DG	0.266816	0.008417	12973
ULG75	Mongolia_XiongNu.SG	Mbuti.DG	0.226157	0.003661	88953
ULG75	Russia_EarlySarmatian_SouthernUrals.SG	Mbuti.DG	0.252187	0.004143	65741
ULG75	Montenegro_IA.SG	Mbuti.DG	0.254223	0.026238	1135
ULG75	Pakistan_IA_Aligrama2	Mbuti.DG	0.241287	0.00491	53402
ULG75	Pakistan_IA_Aligrama2_published	Mbuti.DG	0.249121	0.00402	73367
ULG75	Pakistan_IA_Arkotkila	Mbuti.DG	0.24782	0.006907	19625
ULG75	Pakistan_IA_Barikot	Mbuti.DG	0.250695	0.004229	65393
ULG75	Pakistan_IA_Butkara	Mbuti.DG	0.25271	0.003814	74608
ULG75	Pakistan_IA_Gogdara	Mbuti.DG	0.250279	0.004183	68686
ULG75	Pakistan_IA_Katelai	Mbuti.DG	0.25079	0.003511	93963
ULG75	Pakistan_IA_Katelai_published	Mbuti.DG	0.253466	0.004037	72345
ULG75	Pakistan_IA_Loebanr	Mbuti.DG	0.252153	0.003426	98741
ULG75	Pakistan_IA_Loebanr_o_published	Mbuti.DG	0.246609	0.004764	51673
ULG75	Pakistan_IA_Loebanr_published	Mbuti.DG	0.248484	0.004007	73138
ULG75	Pakistan_IA_Udegram	Mbuti.DG	0.252804	0.00347	92137
ULG75	Pakistan_IA_Udegram_o	Mbuti.DG	0.258038	0.015342	3680
ULG75	Russia_IA_EarlySarmatian	Mbuti.DG	0.250576	0.004605	55268
ULG75	Russia_IA_Scythian_questionable	Mbuti.DG	0.252745	0.004468	68705
ULG75	Russia_Late_Sarmatian.SG	Mbuti.DG	0.254795	0.003944	85301
ULG75	Russia_MiddleSarmatian_SouthernUrals.SG	Mbuti.DG	0.250715	0.005445	38010
ULG75	Russia_Sarmatian.SG	Mbuti.DG	0.255588	0.003854	75983
ULG75	Russia_EasternScythian_SouthernUrals.SG	Mbuti.DG	0.242276	0.006049	29294
ULG75	Russia_EasternScythian_SouthernUrals_o.SG	Mbuti.DG	0.247883	0.016989	2632
ULG75	Ukraine_Chernyakhiv.SG	Mbuti.DG	0.252311	0.007001	21315
ULG75	Ukraine_Chernyakhiv_o.SG	Mbuti.DG	0.236364	0.023688	1400
ULG75	Ukraine_Cimmerians.SG	Mbuti.DG	0.244845	0.007647	16855
ULG75	Ukraine_Cimmerians_o1.SG	Mbuti.DG	0.260192	0.008487	13583
ULG75	Russia_IA.SG	Mbuti.DG	0.245698	0.003565	90338
ULG75	Ukraine_Cimmerians_o2.SG	Mbuti.DG	0.249721	0.007318	18478
ULG75	Ukraine_IA_WesternScythian.SG	Mbuti.DG	0.253825	0.004581	58329
ULG75	Ukraine_IA_WesternScythian_o.SG	Mbuti.DG	0.244683	0.006375	22868
ULG75	Ukraine_Scythian.SG	Mbuti.DG	0.248608	0.004057	81914
ULG75	Ukraine_Scythian.WGC	Mbuti.DG	0.262069	0.02424	1513
ULG75	Russia_Tuva_IA_AldyBel	Mbuti.DG	0.24879	0.004458	63802
ULG75	Russia_Uelen_IA.SG	Mbuti.DG	0.240902	0.016681	3153
ULG75	Saami_IA.SG	Mbuti.DG	0.245421	0.010107	8266
ULG75	Sweden_IA.SG	Mbuti.DG	0.253881	0.004982	49680
ULG75	Tajikistan_Ksirov_Kushan	Mbuti.DG	0.255067	0.004659	57761
ULG75	Turkmenistan_IA.SG	Mbuti.DG	0.259161	0.004417	70503
ULG75	Croatia_Mesolithic_HG	Mbuti.DG	0.242819	0.006036	28782
ULG75	England_Mesolithic	Mbuti.DG	0.240893	0.004537	62102
ULG75	England_Mesolithic_all.SG	Mbuti.DG	0.241851	0.004269	82020
ULG75	Iran_Mesolithic_BeltCave_all_published	Mbuti.DG	0.251667	0.019721	2431
ULG75	Iran_Mesolithic_HotuIIIb_all_published	Mbuti.DG	0.250185	0.008604	11264
ULG75	Israel_Natufian	Mbuti.DG	0.224782	0.005121	39797
ULG75	Israel_Natufian_published	Mbuti.DG	0.222654	0.010537	7491
ULG75	Italy_Mesolithic.SG	Mbuti.DG	0.244488	0.003913	87893
ULG75	Kolyma_M.SG	Mbuti.DG	0.231688	0.004189	84735
ULG75	Lithuania_Mesolithic	Mbuti.DG	0.245248	0.005002	51795
ULG75	Norway_Mesolithic.SG	Mbuti.DG	0.246667	0.004236	83219
ULG75	Portugal_Geometric_Mesolithic	Mbuti.DG	0.242902	0.007853	14027
ULG75	Romania_Mesolithic	Mbuti.DG	0.246307	0.005867	33054
ULG75	Romania_Mesolithic_IronGates	Mbuti.DG	0.245382	0.003841	84336
ULG75	Romania_Mesolithic_IronGates.SG	Mbuti.DG	0.243601	0.003721	88144
ULG75	Romania_Mesolithic_IronGates_published	Mbuti.DG	0.249471	0.005166	42390
ULG75	Serbia_Mesolithic_IronGates	Mbuti.DG	0.245037	0.003548	98438
ULG75	Serbia_Mesolithic_IronGates_o	Mbuti.DG	0.246835	0.004654	62541
ULG75	Serbia_Mesolithic_IronGates_published	Mbuti.DG	0.243782	0.004059	79224
ULG75	Sweden_HG.SG	Mbuti.DG	0.225183	0.010103	7705
ULG75	Sweden_HG_Motala	Mbuti.DG	0.247859	0.003781	83410
ULG75	Sweden_HG_Motala.SG	Mbuti.DG	0.244853	0.004383	75921
ULG75	Sweden_Mesolithic.SG	Mbuti.DG	0.24377	0.003782	87627
ULG75	Ukraine_Mesolithic	Mbuti.DG	0.245753	0.00402	76222
ULG75	Ukraine_Mesolithic_published	Mbuti.DG	0.242092	0.012494	6223
ULG75	Wales_Mesolithic	Mbuti.DG	0.234206	0.005969	27284
ULG75	Afghanistan_DarraIKur_MBA	Mbuti.DG	0.268477	0.017512	2848
ULG75	Anatolia_MLBA.SG	Mbuti.DG	0.252693	0.003771	84871
ULG75	Armenia_LBA.SG	Mbuti.DG	0.253339	0.004684	42045
ULG75	Armenia_LchashenMetsamor.SG	Mbuti.DG	0.255128	0.004383	63232
ULG75	Armenia_MBA	Mbuti.DG	0.254408	0.004697	63118
ULG75	Armenia_MBA.SG	Mbuti.DG	0.25461	0.005898	31526
ULG75	Bulgaria_MLBA	Mbuti.DG	0.255045	0.004685	62033
ULG75	Denmark_LBA.SG	Mbuti.DG	0.24841	0.010987	7087
ULG75	England_LBA	Mbuti.DG	0.257104	0.006614	22942
ULG75	England_MBA	Mbuti.DG	0.252232	0.003476	95540
ULG75	Germany_LBA_Halberstadt_published	Mbuti.DG	0.253435	0.004641	70870
ULG75	Germany_Lech_MBA	Mbuti.DG	0.251728	0.005502	33543
ULG75	Greece_BA_Mycenaean	Mbuti.DG	0.243048	0.004983	33635
ULG75	Greece_BA_Mycenaean_Pylos	Mbuti.DG	0.229489	0.007027	18853
ULG75	Hungary_Hunyadihalom_MCHA	Mbuti.DG	0.248084	0.004976	48978
ULG75	Hungary_LBA.SG	Mbuti.DG	0.247154	0.004172	84683
ULG75	Iberia_LBA	Mbuti.DG	0.23704	0.014059	3674
ULG75	Iberia_LBA_Cogotas	Mbuti.DG	0.24943	0.004099	76169
ULG75	Iberia_MBA	Mbuti.DG	0.265192	0.01763	2684
ULG75	Iberia_MBA.SG	Mbuti.DG	0.247748	0.003831	83425
ULG75	Iberia_Tartessian	Mbuti.DG	0.244463	0.018138	2971
ULG75	Iberia_Tartessian_published	Mbuti.DG	0.24802	0.011023	6743
ULG75	India_Harappan_published	Mbuti.DG	0.241007	0.017861	2575
ULG75	Israel_LBA_Ashkelon	Mbuti.DG	0.246326	0.005463	33647
ULG75	Israel_MLBA	Mbuti.DG	0.245889	0.004878	48205
ULG75	Israel_MLBA_published	Mbuti.DG	0.251948	0.018156	2524
ULG75	Kazakhstan_MLBA_Dali	Mbuti.DG	0.253787	0.004266	72269
ULG75	Kazakhstan_Andronovo.SG	Mbuti.DG	0.256941	0.006066	28719
ULG75	Kazakhstan_CentralSaka.SG	Mbuti.DG	0.242136	0.003583	87446
ULG75	Kazakhstan_LBA	Mbuti.DG	0.25701	0.005817	33999
ULG75	Kazakhstan_LBA_Guruldek_published	Mbuti.DG	0.231052	0.021343	1716
ULG75	Kazakhstan_LBA_Molaly	Mbuti.DG	0.245765	0.004786	56559
ULG75	Kazakhstan_LBA_Tasbas	Mbuti.DG	0.239903	0.021576	1591
ULG75	Kazakhstan_LBA_Zevakinskiy	Mbuti.DG	0.251898	0.003621	85003
ULG75	Kazakhstan_MLBA_Fedorovo_Shoendykol	Mbuti.DG	0.24815	0.004472	63208
ULG75	Kazakhstan_MLBA_Fedorovo_Shoindykol	Mbuti.DG	0.252809	0.004088	73104
ULG75	Kazakhstan_MLBA_KazakhMys	Mbuti.DG	0.252741	0.003846	76705
ULG75	Kazakhstan_MLBA_Zevakinskiy	Mbuti.DG	0.250039	0.004817	55121
ULG75	Kyrgyzstan_BA_Aygirdjal	Mbuti.DG	0.252552	0.004289	64093
ULG75	Kazakhstan_MLBA1_Kyzlbulak	Mbuti.DG	0.250896	0.004863	56499
ULG75	Kazakhstan_MLBA1_Taldysay	Mbuti.DG	0.249454	0.004718	59778
ULG75	Kazakhstan_MLBA2_Kyzlbulak	Mbuti.DG	0.256168	0.00477	59637
ULG75	Kazakhstan_MLBA2_Taldysay	Mbuti.DG	0.248982	0.00614	28997
ULG75	Kazakhstan_OutCentralSaka.SG	Mbuti.DG	0.249796	0.00561	36109
ULG75	Lebanon_MLBA_Canaanite_MBA.SG	Mbuti.DG	0.246643	0.003512	90975
ULG75	Lithuania_BA	Mbuti.DG	0.251167	0.004885	44654
ULG75	Lithuania_LBA.SG	Mbuti.DG	0.279771	0.023861	1388
ULG75	Magadan_BA.SG	Mbuti.DG	0.231665	0.00404	76938
ULG75	Mongolia_Khovsgol_LBA	Mbuti.DG	0.233259	0.003489	94673
ULG75	Montenegro_LBA.SG	Mbuti.DG	0.287564	0.020188	1944
ULG75	Nepal_Samdzong_1500BP.SG	Mbuti.DG	0.222433	0.003647	90053
ULG75	Pakistan_LBA_published	Mbuti.DG	0.281464	0.080167	143
ULG75	Pakistan_MBA_LIA_published	Mbuti.DG	0.226435	0.008318	10800
ULG75	Kazakhstan_Sintashta_MLBA_o.SG	Mbuti.DG	0.273644	0.015277	4054
ULG75	Russia_Bolshoy	Mbuti.DG	0.241507	0.003848	82051
ULG75	Russia_Caucasus_LBA_Dolmen	Mbuti.DG	0.270781	0.01315	5173
ULG75	Russia_Andronovo.SG	Mbuti.DG	0.253219	0.003801	88932
ULG75	Russia_Karasuk.SG	Mbuti.DG	0.251144	0.0035	93767
ULG75	Russia_LBA.SG	Mbuti.DG	0.23526	0.007208	17078
ULG75	Russia_LBA_Priobrazhenka	Mbuti.DG	0.238822	0.006258	23459
ULG75	Kazakhstan_MLBA_Aktogai	Mbuti.DG	0.252912	0.003768	82217
ULG75	Russia_Karasuk_o.SG	Mbuti.DG	0.235387	0.00426	83841
ULG75	Russia_MLBA_Krasnoyarsk	Mbuti.DG	0.255036	0.003511	93053
ULG75	Kazakhstan_MLBA_Alakul_Lisakovskiy	Mbuti.DG	0.250518	0.004508	59604
ULG75	Kazakhstan_MLBA_Alakul_Maitan	Mbuti.DG	0.252	0.003727	90076
ULG75	Russia_MLBA_Krasnoyarsk_o	Mbuti.DG	0.247636	0.004529	64098
ULG75	Russia_MLBA_Sintashta	Mbuti.DG	0.252382	0.003437	98064
ULG75	Russia_MLBA_Sintashta_o1	Mbuti.DG	0.247398	0.005367	33488
ULG75	Russia_MLBA_Sintashta_o2	Mbuti.DG	0.257165	0.004111	76158
ULG75	Russia_MLBA_Sintashta_o3	Mbuti.DG	0.25215	0.005136	51170
ULG75	Russia_North_Caucasus	Mbuti.DG	0.256568	0.004037	69678
ULG75	Russia_North_Caucasus_MBA	Mbuti.DG	0.257288	0.003977	77836
ULG75	Kazakhstan_MLBA_Alakul_Maitan_o	Mbuti.DG	0.253199	0.004021	75111
ULG75	Kazakhstan_MLBA_Alakul_Satan	Mbuti.DG	0.247218	0.004647	66264
ULG75	Kazakhstan_MLBA_Bylkyldak	Mbuti.DG	0.24993	0.004619	63423
ULG75	Kazakhstan_MLBA_Kairan	Mbuti.DG	0.252477	0.003798	78666
ULG75	Kazakhstan_MLBA_Kairan_o	Mbuti.DG	0.248407	0.005269	37569
ULG75	Kazakhstan_MLBA_Kairan_published	Mbuti.DG	0.248072	0.007892	15048
ULG75	Kazakhstan_MLBA_Karagash	Mbuti.DG	0.255199	0.004514	63731
ULG75	Russia_MLBA_Sintashta_published	Mbuti.DG	0.253017	0.006863	22510
ULG75	Kazakhstan_MLBA_OyDzhaylau	Mbuti.DG	0.25519	0.00394	80938
ULG75	Kazakhstan_MLBA_OyDzhaylau_o	Mbuti.DG	0.252025	0.007311	18582
ULG75	Kazakhstan_MLBA_Solyanka	Mbuti.DG	0.250897	0.005942	29998
ULG75	Kazakhstan_MLBA1_AkMoustafa	Mbuti.DG	0.251627	0.004741	58131
ULG75	Russia_Steppe_Lola	Mbuti.DG	0.25558	0.004838	60727
ULG75	Russia_Sintashta_MLBA.SG	Mbuti.DG	0.252195	0.003966	77778
ULG75	Scotland_LBA	Mbuti.DG	0.25163	0.003829	79257
ULG75	Scotland_LBA_published	Mbuti.DG	0.244246	0.026295	1237
ULG75	Scotland_MBA	Mbuti.DG	0.251242	0.003873	76967
ULG75	Sweden_BA.SG	Mbuti.DG	0.24715	0.008466	12691
ULG75	Russia_Mezhovskaya.SG	Mbuti.DG	0.249819	0.004128	78423
ULG75	Russia_MLBA_Potapovka	Mbuti.DG	0.251104	0.005747	37933
ULG75	Russia_MLBA_Priobrazhenka	Mbuti.DG	0.255697	0.018325	2367
ULG75	Russia_Petrovka	Mbuti.DG	0.247308	0.006392	24747
ULG75	Russia_Poltavka	Mbuti.DG	0.255839	0.003727	89098
ULG75	Russia_Poltavka_o	Mbuti.DG	0.24969	0.005136	47845
ULG75	Russia_Poltavka_published	Mbuti.DG	0.253467	0.00519	45467
ULG75	Russia_Potapovka	Mbuti.DG	0.249265	0.00483	48190
ULG75	Russia_Potapovka_o	Mbuti.DG	0.254772	0.004539	67368
ULG75	Russia_Srubnaya	Mbuti.DG	0.25284	0.003567	93596
ULG75	Russia_Srubnaya_Alakul.SG	Mbuti.DG	0.253325	0.003517	95615
ULG75	Russia_Srubnaya_o	Mbuti.DG	0.259111	0.005329	39408
ULG75	Ukraine_LateSrubnaya.SG	Mbuti.DG	0.246764	0.009956	8408
ULG75	Turkmenistan_LBA_Parkhai	Mbuti.DG	0.260918	0.004639	62765
ULG75	Turkmenistan_LBA_Parkhai_o	Mbuti.DG	0.259767	0.004611	62255
ULG75	Turkmenistan_LBA_Sumbar	Mbuti.DG	0.264768	0.005171	50042
ULG75	Turkmenistan_Parkhai_MBA	Mbuti.DG	0.264115	0.00469	60910
ULG75	Wales_MBA	Mbuti.DG	0.228194	0.019875	2058
ULG75	Anatolia_Boncuklu_N.SG	Mbuti.DG	0.246769	0.004238	81741
ULG75	Anatolia_Kumtepe_N.SG	Mbuti.DG	0.24953	0.009471	9664
ULG75	Anatolia_N	Mbuti.DG	0.249616	0.003485	98591
ULG75	Anatolia_N.SG	Mbuti.DG	0.250526	0.00385	87826
ULG75	Anatolia_N_published	Mbuti.DG	0.247979	0.003627	88941
ULG75	Anatolia_TepecikCiftlik_N.SG	Mbuti.DG	0.251149	0.004243	64727
ULG75	Anatolia_TepecikCiftlik_N_o.SG	Mbuti.DG	0.248686	0.026027	1405
ULG75	Austria_EN_LBK	Mbuti.DG	0.249443	0.003573	91372
ULG75	Bulgaria_Dzhulyunitsa_N	Mbuti.DG	0.231854	0.006791	19893
ULG75	Bulgaria_Krepost_N	Mbuti.DG	0.252352	0.006999	18856
ULG75	Bulgaria_MalakPreslavets_N	Mbuti.DG	0.24627	0.0045	49228
ULG75	Bulgaria_MalakPreslavets_N_published	Mbuti.DG	0.249842	0.008302	14314
ULG75	Bulgaria_N	Mbuti.DG	0.246366	0.004578	60474
ULG75	Bulgaria_N_published	Mbuti.DG	0.247618	0.004163	66643
ULG75	Croatia_EN_Impressa	Mbuti.DG	0.249527	0.004331	61961
ULG75	Croatia_EN_Starcevo	Mbuti.DG	0.282	0.014774	4532
ULG75	Croatia_LN_Starcevo	Mbuti.DG	0.25193	0.004449	62184
ULG75	Croatia_MN_Sopot	Mbuti.DG	0.248159	0.003857	79517
ULG75	Croatia_N_Cardial	Mbuti.DG	0.250003	0.003899	75321
ULG75	Croatia_Vucedol	Mbuti.DG	0.248841	0.007975	14361
ULG75	Czech_Baalberge	Mbuti.DG	0.253391	0.004579	65408
ULG75	Czech_CordedWare	Mbuti.DG	0.254382	0.003656	89163
ULG75	Czech_Eneolithic	Mbuti.DG	0.251032	0.00483	58282
ULG75	Czech_Megalithic.SG	Mbuti.DG	0.24432	0.004441	61259
ULG75	Czech_MN	Mbuti.DG	0.249891	0.004615	55938
ULG75	Czech_N	Mbuti.DG	0.249832	0.004049	72992
ULG75	Denmark_LN.SG	Mbuti.DG	0.251979	0.007528	16170
ULG75	Denmark_MN_B.SG	Mbuti.DG	0.249831	0.006548	21638
ULG75	DevilsCave_N.SG	Mbuti.DG	0.222307	0.003687	88753
ULG75	England_N	Mbuti.DG	0.247566	0.003613	92881
ULG75	England_N.SG	Mbuti.DG	0.248927	0.003493	96590
ULG75	England_N_all.SG	Mbuti.DG	0.248961	0.003513	94822
ULG75	England_N_possible	Mbuti.DG	0.251566	0.004965	50589
ULG75	England_N_published	Mbuti.DG	0.265621	0.012529	6023
ULG75	Estonia_CordedWare.SG	Mbuti.DG	0.252901	0.003801	87447
ULG75	Estonia_CWC	Mbuti.DG	0.251844	0.004499	68364
ULG75	Estonia_EMN_Narva	Mbuti.DG	0.250199	0.00511	47123
ULG75	Estonia_MN_CCC	Mbuti.DG	0.25777	0.006893	22265
ULG75	Estonia_N_CombCeramic.SG	Mbuti.DG	0.244191	0.008727	11971
ULG75	France_BerryAuBac	Mbuti.DG	0.21817	0.014072	4391
ULG75	France_MN	Mbuti.DG	0.250997	0.003893	77190
ULG75	Germany_CordedWare	Mbuti.DG	0.254585	0.003638	89173
ULG75	Germany_CordedWare.SG	Mbuti.DG	0.254242	0.006177	26149
ULG75	Germany_CordedWare_o	Mbuti.DG	0.252188	0.006719	22201
ULG75	Germany_CordedWare_Tauber	Mbuti.DG	0.264591	0.010602	7622
ULG75	Germany_EN_LBK	Mbuti.DG	0.247418	0.003605	91610
ULG75	Germany_EN_LBK_published	Mbuti.DG	0.248902	0.003486	91130
ULG75	Germany_EN_LBK_Stuttgart_published.DG	Mbuti.DG	0.245843	0.003954	86563
ULG75	Germany_LN_Alberstedt	Mbuti.DG	0.252464	0.004262	78446
ULG75	Germany_LN_BenzigerodeHeimburg	Mbuti.DG	0.251661	0.004831	58369
ULG75	Germany_LN_Karsdorf	Mbuti.DG	0.249591	0.008222	12807
ULG75	Germany_MN_Baalberge	Mbuti.DG	0.252787	0.005166	40950
ULG75	Germany_MN_Blatterhohle	Mbuti.DG	0.247671	0.003952	79831
ULG75	Germany_MN_Esperstedt	Mbuti.DG	0.249645	0.004453	74260
ULG75	Germany_MN_Salzmuende	Mbuti.DG	0.251068	0.009151	11050
ULG75	Germany_N_published	Mbuti.DG	0.2631	0.010587	9112
ULG75	Gibraltar_N	Mbuti.DG	0.246487	0.006042	29009
ULG75	Greece_LN.SG	Mbuti.DG	0.251951	0.003931	84408
ULG75	Greece_N	Mbuti.DG	0.245987	0.00473	59501
ULG75	Greece_N.SG	Mbuti.DG	0.250499	0.004967	54486
ULG75	Greece_Peloponnese_N	Mbuti.DG	0.254474	0.003792	87084
ULG75	Greece_Peloponnese_N_all	Mbuti.DG	0.252193	0.004881	58173
ULG75	Hungary_EN_HG_Koros	Mbuti.DG	0.24714	0.00439	65534
ULG75	Hungary_EN_Koros	Mbuti.DG	0.245845	0.004038	78380
ULG75	Hungary_EN_Koros_all	Mbuti.DG	0.250006	0.006559	23710
ULG75	Hungary_EN_Starcevo	Mbuti.DG	0.246197	0.004452	67402
ULG75	Hungary_EN_Starcevo_all	Mbuti.DG	0.249819	0.004768	57428
ULG75	Hungary_EN_Starcevo_o_published	Mbuti.DG	0.251279	0.004815	53706
ULG75	Hungary_LBK_MN.SG	Mbuti.DG	0.249808	0.004337	84690
ULG75	Hungary_LN_Lengyel	Mbuti.DG	0.248881	0.003943	75927
ULG75	Hungary_LN_Lengyel_published	Mbuti.DG	0.244207	0.005388	36998
ULG75	Hungary_LN_Sopot	Mbuti.DG	0.253438	0.004738	54179
ULG75	Hungary_LN_Tisza	Mbuti.DG	0.246949	0.004207	76213
ULG75	Hungary_LN_Tisza_published	Mbuti.DG	0.235678	0.012624	5202
ULG75	Hungary_MBA_Vatya.SG	Mbuti.DG	0.248933	0.004047	72411
ULG75	Hungary_MN	Mbuti.DG	0.24127	0.004497	59128
ULG75	Hungary_MN_ALBK_Szakalhat	Mbuti.DG	0.247409	0.005281	41019
ULG75	Hungary_MN_ALPc	Mbuti.DG	0.249327	0.00388	79589
ULG75	Hungary_MN_ALPc_Bukk	Mbuti.DG	0.251586	0.004781	62893
ULG75	Hungary_MN_ALPc_Esztar	Mbuti.DG	0.237877	0.010111	8233
ULG75	Hungary_MN_ALPc_I	Mbuti.DG	0.236027	0.006625	22703
ULG75	Hungary_MN_ALPc_III	Mbuti.DG	0.253949	0.006872	23880
ULG75	Hungary_MN_ALPc_III_published	Mbuti.DG	0.247181	0.004862	51906
ULG75	Hungary_MN_ALPc_Szakalhat	Mbuti.DG	0.249361	0.004763	44875
ULG75	Hungary_MN_ALPc_Szatmar	Mbuti.DG	0.251688	0.004567	61106
ULG75	Hungary_MN_ALPc_Tiszadob	Mbuti.DG	0.249316	0.003893	73318
ULG75	Hungary_MN_LBK	Mbuti.DG	0.248761	0.003989	78180
ULG75	Hungary_MN_LBK_published	Mbuti.DG	0.246942	0.004873	56677
ULG75	Hungary_MN_Vinca	Mbuti.DG	0.24894	0.004637	55622
ULG75	Hungary_MN_Vinca_published	Mbuti.DG	0.254993	0.004745	51944
ULG75	Iberia_EN	Mbuti.DG	0.248694	0.003804	82236
ULG75	Iberia_EN.SG	Mbuti.DG	0.248055	0.003947	85821
ULG75	Iberia_EN_Cardial	Mbuti.DG	0.242386	0.004783	50147
ULG75	Iberia_EN_Epicardial	Mbuti.DG	0.250211	0.005645	33588
ULG75	Iberia_LN	Mbuti.DG	0.245587	0.00375	85935
ULG75	Iberia_LN.SG	Mbuti.DG	0.252796	0.006014	27207
ULG75	Iberia_LN_C	Mbuti.DG	0.247107	0.003644	86584
ULG75	Iberia_LN_C.SG	Mbuti.DG	0.249692	0.003662	92025
ULG75	Iberia_MN	Mbuti.DG	0.247501	0.003619	90342
ULG75	Iberia_MN.SG	Mbuti.DG	0.247533	0.003789	89363
ULG75	Iberia_MN_BA.SG	Mbuti.DG	0.245584	0.003766	89552
ULG75	Iberia_MN_Cadiz	Mbuti.DG	0.250054	0.004968	51736
ULG75	Iberia_MN_published	Mbuti.DG	0.252041	0.005199	47803
ULG75	Iberia_N_C	Mbuti.DG	0.246713	0.004112	74593
ULG75	Iberia_N_EBA	Mbuti.DG	0.238191	0.005735	30768
ULG75	Iran_GanjDareh_N	Mbuti.DG	0.259543	0.003838	84322
ULG75	Iran_LN_SehGabi	Mbuti.DG	0.258711	0.00523	39897
ULG75	Iran_TepeAbdulHosein_N.SG	Mbuti.DG	0.263509	0.004047	81569
ULG75	Iran_Wezmeh_N.SG	Mbuti.DG	0.257286	0.004193	84166
ULG75	Ireland_Megalithic.SG	Mbuti.DG	0.246686	0.003612	92983
ULG75	Ireland_MN.SG	Mbuti.DG	0.244714	0.004299	84755
ULG75	Israel_Middle_Late_PPNB	Mbuti.DG	0.239789	0.009755	8606
ULG75	Israel_PPNB	Mbuti.DG	0.245791	0.004767	57468
ULG75	Italy_N.SG	Mbuti.DG	0.249935	0.003527	94510
ULG75	Italy_N_oWHG.SG	Mbuti.DG	0.254987	0.005588	39891
ULG75	Jordan_Late_PPNB	Mbuti.DG	0.234983	0.005751	35076
ULG75	Jordan_PPNB	Mbuti.DG	0.23365	0.005534	30243
ULG75	Jordan_PPNB_published	Mbuti.DG	0.238749	0.007708	13882
ULG75	Jordan_PPNC	Mbuti.DG	0.240249	0.006436	22971
ULG75	Jordan_PPNC_published	Mbuti.DG	0.227471	0.015339	3651
ULG75	Latvia_LN_CordedWare	Mbuti.DG	0.245555	0.006958	20189
ULG75	Latvia_MN	Mbuti.DG	0.248756	0.003882	79617
ULG75	Latvia_MN_Comb_Ware.SG	Mbuti.DG	0.251693	0.004671	56520
ULG75	Lithuania_EMN_Narva	Mbuti.DG	0.244162	0.003881	87655
ULG75	Lithuania_LN	Mbuti.DG	0.254664	0.003823	89329
ULG75	Macedonia_N	Mbuti.DG	0.244072	0.004328	64483
ULG75	Mentesh	Mbuti.DG	0.259416	0.006349	27056
ULG75	Norway_N_HG.SG	Mbuti.DG	0.249266	0.004636	62201
ULG75	Poland_BKG.SG	Mbuti.DG	0.248955	0.00353	94078
ULG75	Poland_BKG_o1.SG	Mbuti.DG	0.243679	0.005016	45451
ULG75	Poland_BKG_o2.SG	Mbuti.DG	0.244061	0.00429	71667
ULG75	Poland_ChopiceVeseleCulture	Mbuti.DG	0.253499	0.004432	67133
ULG75	Poland_CordedWare.SG	Mbuti.DG	0.229696	0.023739	1346
ULG75	Poland_CordedWare_ProtoUnetice.SG	Mbuti.DG	0.243136	0.009858	8957
ULG75	Poland_CWC	Mbuti.DG	0.251778	0.004688	58295
ULG75	Poland_CWC.SG	Mbuti.DG	0.254199	0.003889	86541
ULG75	Poland_GAC.SG	Mbuti.DG	0.248891	0.004195	75541
ULG75	Poland_Globular_Amphora	Mbuti.DG	0.248334	0.004363	60415
ULG75	Poland_Globular_Amphora_published	Mbuti.DG	0.236511	0.010937	7251
ULG75	Poland_Koszyce_GAC.SG	Mbuti.DG	0.250352	0.00353	94527
ULG75	Poland_Ksiaznice_GAC.SG	Mbuti.DG	0.247252	0.004057	77074
ULG75	Poland_Mierzanowice_GAC.SG	Mbuti.DG	0.254434	0.005856	28235
ULG75	Poland_Sandomierz_GAC.SG	Mbuti.DG	0.249185	0.004435	62402
ULG75	Poland_TRB.SG	Mbuti.DG	0.249605	0.003667	87962
ULG75	Romania_EN	Mbuti.DG	0.251207	0.004171	67569
ULG75	Russia_Caucasus_Eneolithic	Mbuti.DG	0.256982	0.004967	52984
ULG75	Russia_Khvalynsk_Eneolithic	Mbuti.DG	0.25267	0.004688	58700
ULG75	Russia_Lokomotiv_Eneolithic.SG	Mbuti.DG	0.222071	0.003929	76925
ULG75	Russia_Shamanka_Eneolithic.SG	Mbuti.DG	0.226547	0.003465	95136
ULG75	Russia_Steppe_Eneolithic	Mbuti.DG	0.260776	0.003905	80058
ULG75	Russia_UstBelaya_Angara	Mbuti.DG	0.232042	0.003689	87705
ULG75	Russia_UstBelaya_Angara_published	Mbuti.DG	0.225438	0.004332	65539
ULG75	Russia_UstIda_LN.SG	Mbuti.DG	0.228511	0.003968	79749
ULG75	Scotland_Megalithic.SG	Mbuti.DG	0.244648	0.005993	27750
ULG75	Scotland_Mesolithic_all.SG	Mbuti.DG	0.260605	0.021447	1932
ULG75	Scotland_N	Mbuti.DG	0.250695	0.003477	99045
ULG75	Scotland_N.SG	Mbuti.DG	0.247739	0.004053	73478
ULG75	Scotland_N_all.SG	Mbuti.DG	0.253621	0.004882	51532
ULG75	Scotland_N_o	Mbuti.DG	0.267451	0.009111	11319
ULG75	Scotland_N_published	Mbuti.DG	0.259633	0.008809	10836
ULG75	Serbia_EN	Mbuti.DG	0.24773	0.003798	79908
ULG75	Serbia_EN_published	Mbuti.DG	0.234879	0.013091	4698
ULG75	Serbia_EN_Starcevo	Mbuti.DG	0.253878	0.004497	62416
ULG75	Serbia_N	Mbuti.DG	0.253107	0.007717	16127
ULG75	Sweden_LN.SG	Mbuti.DG	0.247743	0.004078	82544
ULG75	Sweden_LNBA	Mbuti.DG	0.250493	0.004866	53045
ULG75	Sweden_Megalithic	Mbuti.DG	0.251396	0.004425	65584
ULG75	Sweden_Megalithic.SG	Mbuti.DG	0.247275	0.003731	91783
ULG75	Sweden_PWC	Mbuti.DG	0.253596	0.006197	30991
ULG75	Sweden_PWC_NHG.SG	Mbuti.DG	0.246511	0.00432	79701
ULG75	Sweden_TRB_MN	Mbuti.DG	0.248496	0.00613	29363
ULG75	Sweden_TRB_MN.SG	Mbuti.DG	0.241151	0.004581	58314
ULG75	Ukraine_Eneolithic	Mbuti.DG	0.249563	0.005748	31656
ULG75	Ukraine_Eneolithic_SredniStog	Mbuti.DG	0.247715	0.005129	45395
ULG75	Ukraine_Eneolithic_SredniStog_o4	Mbuti.DG	0.259044	0.004812	55676
ULG75	Ukraine_Eneolithic_Trypillia	Mbuti.DG	0.230832	0.008159	12833
ULG75	Ukraine_Eneolithic_Trypillia_published	Mbuti.DG	0.251655	0.007151	18775
ULG75	Ukraine_Eneolithic_Trypillian_published	Mbuti.DG	0.25852	0.013267	4845
ULG75	Ukraine_Globular_Amphora	Mbuti.DG	0.248793	0.003909	77254
ULG75	Ukraine_N	Mbuti.DG	0.249976	0.003771	86196
ULG75	Ukraine_N_o2_published	Mbuti.DG	0.242638	0.007857	14976
ULG75	Ukraine_N_published	Mbuti.DG	0.248589	0.005194	37872
ULG75	Russia_Steppe_Catacomb	Mbuti.DG	0.254572	0.00411	69568
ULG75	UstBelaya_N.SG	Mbuti.DG	0.223306	0.005338	39089
ULG75	Uzbekistan_Bustan_Eneolithic	Mbuti.DG	0.256738	0.005226	49311
ULG75	Uzbekistan_ZamanBaba_N	Mbuti.DG	0.269869	0.026458	1210
ULG75	Wales_LN	Mbuti.DG	0.247676	0.007273	19087
ULG75	Wales_LN.SG	Mbuti.DG	0.248468	0.006695	21929
ULG75	Wales_N	Mbuti.DG	0.2537	0.007374	16293
ULG75	Wales_N_all.SG	Mbuti.DG	0.259949	0.010087	8761
ULG75	Anatolia_Epipaleolithic	Mbuti.DG	0.239675	0.004506	64508
ULG75	Austria_KremsWA3	Mbuti.DG	0.224451	0.007931	17337
ULG75	Belgium_UP_GoyetQ116_1_published_all	Mbuti.DG	0.233923	0.004628	58434
ULG75	Belgium_UP_GoyetQ-2_published	Mbuti.DG	0.244185	0.012987	5090
ULG75	Belgium_UP_GoyetQ376-19_published	Mbuti.DG	0.259516	0.021503	1850
ULG75	Belgium_UP_Magdalenian	Mbuti.DG	0.232603	0.007097	17783
ULG75	Czech_Pavlov1	Mbuti.DG	0.242619	0.013846	4248
ULG75	Czech_Vestonice13	Mbuti.DG	0.235989	0.009885	8824
ULG75	Czech_Vestonice15	Mbuti.DG	0.251538	0.019632	2304
ULG75	Czech_Vestonice16	Mbuti.DG	0.229832	0.004895	56035
ULG75	Czech_Vestonice43	Mbuti.DG	0.211534	0.009172	9897
ULG75	France_Chaudardes_published	Mbuti.DG	0.239827	0.011364	6733
ULG75	France_Iboussieres25_1	Mbuti.DG	0.256051	0.012223	6104
ULG75	France_Iboussieres31_2	Mbuti.DG	0.238716	0.011891	6174
ULG75	France_Ranchot88_published	Mbuti.DG	0.246149	0.006159	30082
ULG75	France_Rigney1_published	Mbuti.DG	0.281925	0.019265	2570
ULG75	France_Rochedane_published	Mbuti.DG	0.242285	0.007373	17101
ULG75	Georgia_Kotias.SG	Mbuti.DG	0.260874	0.00415	84297
ULG75	Georgia_Satsurblia.SG	Mbuti.DG	0.253818	0.004766	59173
ULG75	Germany_Bockstein_published	Mbuti.DG	0.235823	0.02196	1630
ULG75	Germany_Burkhardtshohle_published	Mbuti.DG	0.224981	0.016475	2860
ULG75	Germany_Falkenstein	Mbuti.DG	0.23499	0.007834	13802
ULG75	Germany_HohleFels49_published	Mbuti.DG	0.208455	0.012285	4609
ULG75	Iberia_ElMiron	Mbuti.DG	0.234399	0.004893	48462
ULG75	Iberia_HG	Mbuti.DG	0.239973	0.004346	71686
ULG75	Iberia_HG.SG	Mbuti.DG	0.242263	0.004083	81785
ULG75	Iberia_HG_published	Mbuti.DG	0.235875	0.005666	35611
ULG75	Iberia_HG_published.SG	Mbuti.DG	0.240147	0.004294	79113
ULG75	Iberia_UP_Azilian	Mbuti.DG	0.237282	0.006463	26958
ULG75	Italy_North_Villabruna_HG	Mbuti.DG	0.246224	0.004623	67453
ULG75	Italy_Sicily_HG_OrienteC_published	Mbuti.DG	0.231411	0.012867	4928
ULG75	Italy_South_HG_Ostuni1	Mbuti.DG	0.229029	0.006246	24794
ULG75	Italy_South_HG_Ostuni2	Mbuti.DG	0.241408	0.023609	1284
ULG75	Italy_South_HG_Paglicci133_published	Mbuti.DG	0.235141	0.011525	5921
ULG75	Latvia_HG	Mbuti.DG	0.247367	0.003621	91056
ULG75	Latvia_HG.SG	Mbuti.DG	0.24234	0.004061	81793
ULG75	Luxembourg_Loschbour_published.DG	Mbuti.DG	0.244059	0.004068	86749
ULG75	Romania_Muierii2	Mbuti.DG	0.222783	0.010906	6206
ULG75	Romania_Oase1	Mbuti.DG	0.201878	0.007348	15226
ULG75	Russia_AfontovaGora2.SG	Mbuti.DG	0.255937	0.011425	6550
ULG75	Russia_AfontovaGora3	Mbuti.DG	0.250991	0.00691	20541
ULG75	Russia_EHG	Mbuti.DG	0.244996	0.004966	41593
ULG75	Russia_HG	Mbuti.DG	0.240988	0.012256	5226
ULG75	Russia_HG_Karelia	Mbuti.DG	0.249042	0.00425	76191
ULG75	Russia_HG_Sosnoviy	Mbuti.DG	0.249223	0.004918	48619
ULG75	Russia_HG_Tyumen	Mbuti.DG	0.249817	0.004727	62098
ULG75	Russia_Kostenki12	Mbuti.DG	0.219336	0.013143	4377
ULG75	Russia_Kostenki14	Mbuti.DG	0.233988	0.004289	79064
ULG75	Russia_MA1_HG.SG	Mbuti.DG	0.243279	0.004814	59890
ULG75	Russia_Popovo_HG	Mbuti.DG	0.240883	0.012451	5079
ULG75	Russia_Sidelkino_HG.SG	Mbuti.DG	0.249131	0.004388	71551
ULG75	Russia_Sunghir1.SG	Mbuti.DG	0.233504	0.004561	59306
ULG75	Russia_Sunghir2.SG	Mbuti.DG	0.230467	0.004426	83676
ULG75	Russia_Sunghir3.SG	Mbuti.DG	0.227769	0.004054	84507
ULG75	Russia_Sunghir4.SG	Mbuti.DG	0.229689	0.004402	83499
ULG75	Russia_Sunghir6.SG	Mbuti.DG	0.252189	0.004192	83650
ULG75	Russia_Ust_Ishim_HG_published.DG	Mbuti.DG	0.211968	0.003901	87670
ULG75	Sweden_Motala_HG	Mbuti.DG	0.251044	0.013422	4409
ULG75	Switzerland_Bichon.SG	Mbuti.DG	0.239042	0.004283	84593
ULG75	Russia_HG_Samara	Mbuti.DG	0.245085	0.005401	36337
ULG75	Yana_UP.SG	Mbuti.DG	0.228237	0.003811	88034
ULG75	Anatolia_Alalakh_MLBA	Mbuti.DG	0.251242	0.003371	98276
ULG75	Anatolia_Alalakh_MLBA_outlier	Mbuti.DG	0.252269	0.004886	56294
ULG75	Caucasus_lowlands_LC	Mbuti.DG	0.245354	0.007613	17446
ULG75	Anatolia_Arslantepe_EBA	Mbuti.DG	0.254444	0.003739	84888
ULG75	Anatolia_Arslantepe_LC	Mbuti.DG	0.255074	0.00341	96343
ULG75	Anatolia_CamlibelTarlasi_LC	Mbuti.DG	0.253175	0.00368	88855
ULG75	Anatolia_Buyukkaya_EC	Mbuti.DG	0.252816	0.005174	47261
ULG75	Syria_Ebla_EMBA	Mbuti.DG	0.251986	0.003642	84625
ULG75	Anatolia_Ikiztepe_LC	Mbuti.DG	0.250745	0.004726	48118
ULG75	Anatolia_TellKurdu_EC	Mbuti.DG	0.245689	0.004652	51602
ULG75	Anatolia_TellKurdu_EMC	Mbuti.DG	0.238129	0.008054	14475
ULG75	Caucasus_lowlands_LN	Mbuti.DG	0.256793	0.004501	59718
ULG75	Anatolia_TitrisHoyuk_EBA	Mbuti.DG	0.244072	0.010223	8009
ULG75	GBR.SG	Mbuti.DG	0.25152	0.003363	106291
ULG75	FIN.SG	Mbuti.DG	0.249966	0.003366	106254
ULG75	CHS.SG	Mbuti.DG	0.223386	0.003427	102909
ULG75	CDX.SG	Mbuti.DG	0.222935	0.003406	102900
ULG75	IBS.SG	Mbuti.DG	0.247546	0.003315	107567
ULG75	PJL.SG	Mbuti.DG	0.24285	0.003301	107047
ULG75	KHV.SG	Mbuti.DG	0.22364	0.003405	103619
ULG75	BEB.SG	Mbuti.DG	0.237472	0.003263	106815
ULG75	ITU.SG	Mbuti.DG	0.239348	0.003287	106774
ULG75	CHB.SG	Mbuti.DG	0.223716	0.00342	103369
ULG75	JPT.SG	Mbuti.DG	0.223853	0.003442	102709
ULG75	TSI.SG	Mbuti.DG	0.250026	0.003325	107047
ULG75	Jordanian.DG	Mbuti.DG	0.237572	0.003534	94975
ULG75	Yakut.DG	Mbuti.DG	0.231044	0.003708	91747
ULG75	Altaian.DG	Mbuti.DG	0.235307	0.003564	92384
ULG75	Spanish.DG	Mbuti.DG	0.247552	0.003645	92457
ULG75	Punjabi.DG	Mbuti.DG	0.240112	0.003404	96961
ULG75	Naxi.DG	Mbuti.DG	0.221758	0.00354	94256
ULG75	Adygei.DG	Mbuti.DG	0.254494	0.003693	92396
ULG75	Irula.DG	Mbuti.DG	0.231745	0.003569	91977
ULG75	French.DG	Mbuti.DG	0.251201	0.003597	95292
ULG75	Italian_North.DG	Mbuti.DG	0.250589	0.004	87843
ULG75	Kalash.DG	Mbuti.DG	0.254009	0.003768	91739
ULG75	Burusho.DG	Mbuti.DG	0.245731	0.003615	92508
ULG75	BedouinB.DG	Mbuti.DG	0.236519	0.003415	91630
ULG75	Jew_Iraqi.DG	Mbuti.DG	0.248788	0.003564	92278
ULG75	Polish.DG	Mbuti.DG	0.248893	0.003819	87876
ULG75	Daur.DG	Mbuti.DG	0.225184	0.003968	87670
ULG75	Hazara.DG	Mbuti.DG	0.239924	0.003493	96606
ULG75	Mongola.DG	Mbuti.DG	0.223708	0.003502	92060
ULG75	Oroqen.DG	Mbuti.DG	0.224387	0.003674	91605
ULG75	Itelmen.DG	Mbuti.DG	0.230581	0.004011	87568
ULG75	Eskimo_Chaplin.DG	Mbuti.DG	0.233877	0.004039	87447
ULG75	Druze.DG	Mbuti.DG	0.246792	0.003498	92260
ULG75	Kusunda.DG	Mbuti.DG	0.223641	0.003578	91157
ULG75	Relli.DG	Mbuti.DG	0.234929	0.003586	92169
ULG75	Kapu.DG	Mbuti.DG	0.235115	0.003688	92182
ULG75	Tuscan.DG	Mbuti.DG	0.249033	0.003589	92530
ULG75	Sindhi.DG	Mbuti.DG	0.247982	0.003671	92252
ULG75	Russian.DG	Mbuti.DG	0.249384	0.003693	92653
ULG75	Hungarian.DG	Mbuti.DG	0.24939	0.003573	92500
ULG75	Tajik.DG	Mbuti.DG	0.248976	0.00349	95445
ULG75	Russia_Abkhasian.DG	Mbuti.DG	0.254325	0.003675	92202
ULG75	Iranian.DG	Mbuti.DG	0.250074	0.003563	92328
ULG75	Yadava.DG	Mbuti.DG	0.237759	0.003692	92035
ULG75	Ami.DG	Mbuti.DG	0.226021	0.003646	91286
ULG75	Cambodian.DG	Mbuti.DG	0.223188	0.00358	91937
ULG75	Korean.DG	Mbuti.DG	0.225003	0.003588	91882
ULG75	Dai.DG	Mbuti.DG	0.222171	0.003463	96501
ULG75	Uyghur.DG	Mbuti.DG	0.240587	0.003382	96856
ULG75	Eskimo_Sireniki.DG	Mbuti.DG	0.231839	0.003744	91318
ULG75	Even.DG	Mbuti.DG	0.227923	0.003609	94099
ULG75	Icelandic.DG	Mbuti.DG	0.251062	0.003677	92497
ULG75	Thai.DG	Mbuti.DG	0.223356	0.003706	91978
ULG75	Brahmin.DG	Mbuti.DG	0.24261	0.003605	92236
ULG75	Madiga.DG	Mbuti.DG	0.239125	0.003648	92150
ULG75	Finnish.DG	Mbuti.DG	0.249316	0.003495	95378
ULG75	She.DG	Mbuti.DG	0.221749	0.003798	91404
ULG75	Eskimo_Naukan.DG	Mbuti.DG	0.229898	0.00374	90938
ULG75	Czech.DG	Mbuti.DG	0.251299	0.004018	87945
ULG75	Bengali.DG	Mbuti.DG	0.237367	0.003566	92398
ULG75	Lezgin.DG	Mbuti.DG	0.254001	0.003683	92488
ULG75	Greek.DG	Mbuti.DG	0.253345	0.003607	92393
ULG75	Yi.DG	Mbuti.DG	0.221759	0.00368	91923
ULG75	Tujia.DG	Mbuti.DG	0.224662	0.003637	91702
ULG75	Atayal.DG	Mbuti.DG	0.224229	0.003936	87428
ULG75	English.DG	Mbuti.DG	0.250868	0.003675	92595
ULG75	Tubalar.DG	Mbuti.DG	0.236123	0.003738	92286
ULG75	Cretan.DG	Mbuti.DG	0.251934	0.003688	92405
ULG75	Kinh.DG	Mbuti.DG	0.222199	0.00362	91748
ULG75	Aleut.DG	Mbuti.DG	0.237051	0.003592	92143
ULG75	Brahui.DG	Mbuti.DG	0.247336	0.003679	92152
ULG75	Tu.DG	Mbuti.DG	0.224911	0.003609	92075
ULG75	Pathan.DG	Mbuti.DG	0.250261	0.00363	92423
ULG75	Sardinian.DG	Mbuti.DG	0.247431	0.003604	94881
ULG75	Han.DG	Mbuti.DG	0.224604	0.003626	94079
ULG75	Makrani.DG	Mbuti.DG	0.244249	0.003552	92080
ULG75	Balochi.DG	Mbuti.DG	0.25032	0.003819	92164
ULG75	Basque.DG	Mbuti.DG	0.247248	0.003612	92380
ULG75	Miao.DG	Mbuti.DG	0.223941	0.003652	91606
ULG75	Orcadian.DG	Mbuti.DG	0.253662	0.003581	92517
ULG75	Armenian.DG	Mbuti.DG	0.253537	0.003627	92402
ULG75	Mala.DG	Mbuti.DG	0.233247	0.003566	92095
ULG75	Mansi.DG	Mbuti.DG	0.239796	0.003606	92395
ULG75	Turkish.DG	Mbuti.DG	0.249105	0.003722	92418
ULG75	Russia_NorthOssetian.DG	Mbuti.DG	0.251305	0.003711	92389
ULG75	Palestinian.DG	Mbuti.DG	0.239297	0.00349	95132
ULG75	Norwegian.DG	Mbuti.DG	0.24666	0.003938	87856
ULG75	Kyrgyz_Kyrgyzstan.DG	Mbuti.DG	0.233769	0.003512	95250
ULG75	Georgian.DG	Mbuti.DG	0.25403	0.003567	92148
ULG75	Chechen.DG	Mbuti.DG	0.252294	0.00401	87700
ULG75	Xibo.DG	Mbuti.DG	0.222831	0.003692	91923
ULG75	Ulchi.DG	Mbuti.DG	0.227226	0.003718	91592
ULG75	Saami.DG	Mbuti.DG	0.246846	0.003763	92338
ULG75	Samaritan.DG	Mbuti.DG	0.247817	0.004134	86927
ULG75	Hezhen.DG	Mbuti.DG	0.222998	0.003608	91640
ULG75	Bulgarian.DG	Mbuti.DG	0.251606	0.003626	92513
ULG75	Burmese.DG	Mbuti.DG	0.223066	0.003601	92114
ULG75	Tlingit.DG	Mbuti.DG	0.241527	0.003605	92454
ULG75	China_Lahu.DG	Mbuti.DG	0.222417	0.003568	91388
ULG75	Bergamo.DG	Mbuti.DG	0.251873	0.003827	87844
ULG75	Khonda_Dora.DG	Mbuti.DG	0.225543	0.003833	87691
ULG75	Chukchi.DG	Mbuti.DG	0.242609	0.003882	88212
ULG75	Japanese.DG	Mbuti.DG	0.22448	0.003624	93970
ULG75	Albanian.DG	Mbuti.DG	0.251509	0.003968	87906
ULG75	Estonian.DG	Mbuti.DG	0.253681	0.003642	92582
ULG75	YRI.SG	Mbuti.DG	0.082524	0.00217	109277
ULG75	Mongolia_lateMed_Mongol	Mbuti.DG	0.230347	0.003356	103853
ULG75	Mongolia_Altai_MLBA	Mbuti.DG	0.242096	0.003548	89890
ULG75	Mongolia_earlyXiongnu_west	Mbuti.DG	0.245933	0.003695	85744
ULG75	Mongolia_lateXiongnu_han	Mbuti.DG	0.228826	0.003506	91695
ULG75	Mongolia_IA_Ulaanzuukh_SlabGrave	Mbuti.DG	0.226313	0.003703	85658
ULG75	Mongolia_lateXiongnu_sarmatian	Mbuti.DG	0.248082	0.003505	95191
ULG75	Mongolia_lateXiongnu	Mbuti.DG	0.231465	0.003379	97649
ULG75	Mongolia_Chandman_IA	Mbuti.DG	0.243485	0.003631	91604
ULG75	Mongolia_centralMongolia_preBA	Mbuti.DG	0.223617	0.005636	34652
ULG75	Russia_Fofonovo_EN	Mbuti.DG	0.22061	0.004232	66685
ULG75	Mongolia_EMBA_Chemurchek_southAltai	Mbuti.DG	0.247107	0.0044	74685
ULG75	Russia_lateXiongnu	Mbuti.DG	0.230677	0.003715	86362
ULG75	Mongolia_lateMed_Mongol_o	Mbuti.DG	0.218291	0.005628	31269
ULG75	Mongolia_EMBA_Chemurchek_northAlai	Mbuti.DG	0.226993	0.004295	79105
ULG75	Mongolia_earlyMed_Turk	Mbuti.DG	0.237197	0.003595	90999
ULG75	Mongolia_earlyMed_Uigur	Mbuti.DG	0.242215	0.003415	96932
ULG75	Mongolia_earlyMed_Uigur_o	Mbuti.DG	0.229785	0.00518	54452
ULG75	Russia_IA_Ulaanzuukh_SlabGrave	Mbuti.DG	0.253655	0.026902	1352
ULG75	Mongolia_Afanasievo_Mongolia	Mbuti.DG	0.258292	0.004159	71907
ULG75	Mongolia_lateMed_o	Mbuti.DG	0.234368	0.004384	69422
ULG75	Mongolia_earlyXiongnu_rest	Mbuti.DG	0.234395	0.003877	79072
ULG75	Mongolia_earlyXiongnu_o	Mbuti.DG	0.228424	0.004614	66867
ULG75	Mongolia_eastMongolia_preBA	Mbuti.DG	0.217221	0.004896	48514
ULG75	Mongolia_IA_o	Mbuti.DG	0.236704	0.007416	16355
ULG75	Mongolia_earlyMed_o	Mbuti.DG	0.255993	0.004571	66088
ULG75	Mongolia_earlyMed_Turk_o	Mbuti.DG	0.226476	0.004487	67055
ULG75	Mongolia_MLBA_o	Mbuti.DG	0.241323	0.004089	72719
ULG75	Mongolia_lateMed_Khitan	Mbuti.DG	0.228831	0.004047	75138
ULG75	Mongolia_MLBA_Ulaanzuukh_SlabGrave	Mbuti.DG	0.226208	0.003605	89516
ULG75	Mongolia_lateXiongnu_o	Mbuti.DG	0.226464	0.004527	69282
Uzbekistan_BA_Bustan	Anatolia_C	Mbuti.DG	0.259592	0.002948	397916
Uzbekistan_BA_Bustan	Armenia_C	Mbuti.DG	0.260582	0.002627	687349
Uzbekistan_BA_Bustan	Bulgaria_C	Mbuti.DG	0.256825	0.002596	710509
Uzbekistan_BA_Bustan	Bulgaria_C_published	Mbuti.DG	0.259279	0.003845	68942
Uzbekistan_BA_Bustan	Bulgaria_Varna_C	Mbuti.DG	0.254962	0.002975	314299
Uzbekistan_BA_Bustan	Hungary_C_Balaton_Lasinja	Mbuti.DG	0.255229	0.002715	624251
Uzbekistan_BA_Bustan	Hungary_C_Balaton_Lasinja_published	Mbuti.DG	0.253755	0.002874	556419
Uzbekistan_BA_Bustan	Hungary_EarlyC_Tiszapolgar	Mbuti.DG	0.255972	0.002803	420051
Uzbekistan_BA_Bustan	Hungary_EarlyC_Tiszapolgar_Bodrogkeresztur_published	Mbuti.DG	0.257159	0.002839	555838
Uzbekistan_BA_Bustan	Hungary_LateC_Baden	Mbuti.DG	0.257607	0.002606	722705
Uzbekistan_BA_Bustan	Hungary_LateC_Baden_published	Mbuti.DG	0.25832	0.002743	628357
Uzbekistan_BA_Bustan	Hungary_LateC_Protoboleraz	Mbuti.DG	0.256424	0.002784	599953
Uzbekistan_BA_Bustan	Hungary_LateC_Protoboleraz_published	Mbuti.DG	0.256541	0.002732	662964
Uzbekistan_BA_Bustan	Iberia_C	Mbuti.DG	0.255308	0.00257	777713
Uzbekistan_BA_Bustan	Iberia_C.SG	Mbuti.DG	0.25112	0.002622	732178
Uzbekistan_BA_Bustan	Iberia_C_BA	Mbuti.DG	0.253504	0.002924	412262
Uzbekistan_BA_Bustan	Iberia_C_BA_published	Mbuti.DG	0.254534	0.004187	65067
Uzbekistan_BA_Bustan	Iberia_C_published	Mbuti.DG	0.255717	0.002769	536007
Uzbekistan_BA_Bustan	Tajikistan_C_Sarazm	Mbuti.DG	0.266032	0.002735	578827
Uzbekistan_BA_Bustan	Turkmenistan_C_Geoksyur	Mbuti.DG	0.267515	0.002617	695801
Uzbekistan_BA_Bustan	Iran_C_HajjiFiruz	Mbuti.DG	0.259757	0.00268	684321
Uzbekistan_BA_Bustan	Iran_C_SehGabi	Mbuti.DG	0.26318	0.00262	679903
Uzbekistan_BA_Bustan	Iran_C_TepeHissar	Mbuti.DG	0.265571	0.002599	677795
Uzbekistan_BA_Bustan	Iran_C_TepeHissar_published	Mbuti.DG	0.266139	0.003532	126363
Uzbekistan_BA_Bustan	Israel_C	Mbuti.DG	0.25292	0.002529	724602
Uzbekistan_BA_Bustan	Israel_C_published	Mbuti.DG	0.253309	0.002947	180192
Uzbekistan_BA_Bustan	Italy_C.SG	Mbuti.DG	0.254033	0.002691	706742
Uzbekistan_BA_Bustan	Italy_C_BA.SG	Mbuti.DG	0.253775	0.002608	710055
Uzbekistan_BA_Bustan	Italy_North_Remedello_C.SG	Mbuti.DG	0.250386	0.002831	372878
Uzbekistan_BA_Bustan	Italy_Sicily_C_o	Mbuti.DG	0.25879	0.005407	27649
Uzbekistan_BA_Bustan	Romania_C	Mbuti.DG	0.254607	0.002645	592431
Uzbekistan_BA_Bustan	Romania_C.SG	Mbuti.DG	0.2511	0.002811	674631
Uzbekistan_BA_Bustan	Sweden_BAC	Mbuti.DG	0.255174	0.002806	609883
Uzbekistan_BA_Bustan	Sweden_BattleAxe.SG	Mbuti.DG	0.251659	0.002874	393297
Uzbekistan_BA_Bustan	Sweden_FBC	Mbuti.DG	0.253732	0.002888	359010
Uzbekistan_BA_Bustan	Turkmenistan_C_Geoksyur_published	Mbuti.DG	0.260916	0.003645	87482
Uzbekistan_BA_Bustan	Turkmenistan_C_Namazga.SG	Mbuti.DG	0.261871	0.002902	373737
Uzbekistan_BA_Bustan	Turkmenistan_C_Namazga_o.SG	Mbuti.DG	0.257225	0.003094	254630
Uzbekistan_BA_Bustan	Turkmenistan_C_Parkhai	Mbuti.DG	0.266983	0.002612	669282
Uzbekistan_BA_Bustan	Turkmenistan_C_TepeAnau	Mbuti.DG	0.265697	0.002671	630684
Uzbekistan_BA_Bustan	Wales_C	Mbuti.DG	0.253626	0.002938	361503
Uzbekistan_BA_Bustan	Wales_C.SG	Mbuti.DG	0.253517	0.002909	357286
Uzbekistan_BA_Bustan	Anatolia_EBA	Mbuti.DG	0.26082	0.002723	680757
Uzbekistan_BA_Bustan	Anatolia_EBA.SG	Mbuti.DG	0.252858	0.002657	622704
Uzbekistan_BA_Bustan	Armenia_Caucasus_EBA_KuraAraxes	Mbuti.DG	0.261907	0.002881	410651
Uzbekistan_BA_Bustan	Armenia_EBA	Mbuti.DG	0.262477	0.002733	670159
Uzbekistan_BA_Bustan	Bulgaria_BeliBreyag_EBA	Mbuti.DG	0.254883	0.002959	263185
Uzbekistan_BA_Bustan	Bulgaria_EBA	Mbuti.DG	0.258935	0.002631	663174
Uzbekistan_BA_Bustan	Bulgaria_EBA_Ezero	Mbuti.DG	0.257805	0.004343	47702
Uzbekistan_BA_Bustan	Bulgaria_EBA_published	Mbuti.DG	0.255671	0.00285	426229
Uzbekistan_BA_Bustan	Bulgaria_EBA_Yamnaya_o	Mbuti.DG	0.2592	0.003036	259870
Uzbekistan_BA_Bustan	Croatia_LateC_EBA_Vucedol	Mbuti.DG	0.260065	0.002871	310702
Uzbekistan_BA_Bustan	Croatia_MBA	Mbuti.DG	0.257979	0.002725	583422
Uzbekistan_BA_Bustan	Czech_BA	Mbuti.DG	0.256846	0.002787	567816
Uzbekistan_BA_Bustan	Czech_BellBeaker	Mbuti.DG	0.259649	0.00256	785268
Uzbekistan_BA_Bustan	Czech_EBA	Mbuti.DG	0.260146	0.002552	722762
Uzbekistan_BA_Bustan	Czech_EBA_Protounetice	Mbuti.DG	0.257798	0.003794	61767
Uzbekistan_BA_Bustan	Czech_EBA_Unetice	Mbuti.DG	0.259443	0.0029	297289
Uzbekistan_BA_Bustan	Denmark_BA.SG	Mbuti.DG	0.248115	0.003636	82651
Uzbekistan_BA_Bustan	England_BellBeaker	Mbuti.DG	0.260159	0.002558	780500
Uzbekistan_BA_Bustan	England_BellBeaker_published	Mbuti.DG	0.258736	0.003935	68823
Uzbekistan_BA_Bustan	England_C_EBA	Mbuti.DG	0.259528	0.002573	751494
Uzbekistan_BA_Bustan	England_C_EBA_published	Mbuti.DG	0.25764	0.00406	61016
Uzbekistan_BA_Bustan	Estonia_BA.SG	Mbuti.DG	0.254618	0.002628	654954
Uzbekistan_BA_Bustan	Estonia_BA_o.SG	Mbuti.DG	0.254621	0.008153	10456
Uzbekistan_BA_Bustan	France_BellBeaker	Mbuti.DG	0.259654	0.002662	650293
Uzbekistan_BA_Bustan	France_BellBeaker_lowSteppe	Mbuti.DG	0.256747	0.002795	503145
Uzbekistan_BA_Bustan	France_BellBeaker_published	Mbuti.DG	0.259349	0.003788	78927
Uzbekistan_BA_Bustan	Germany_BA.SG	Mbuti.DG	0.259901	0.003938	72924
Uzbekistan_BA_Bustan	Germany_BellBeaker	Mbuti.DG	0.258568	0.002558	781111
Uzbekistan_BA_Bustan	Germany_BellBeaker_published	Mbuti.DG	0.257064	0.002937	240423
Uzbekistan_BA_Bustan	Germany_EBA_Unetice	Mbuti.DG	0.257912	0.002633	681217
Uzbekistan_BA_Bustan	Germany_EBA_Unetice_published	Mbuti.DG	0.258325	0.002825	527746
Uzbekistan_BA_Bustan	Germany_Lech_BellBeaker	Mbuti.DG	0.257042	0.002638	683153
Uzbekistan_BA_Bustan	Germany_Lech_EBA	Mbuti.DG	0.25771	0.002562	756668
Uzbekistan_BA_Bustan	Gibraltar_BA	Mbuti.DG	0.255115	0.002882	399966
Uzbekistan_BA_Bustan	Greece_Crete_Armenoi	Mbuti.DG	0.260828	0.005166	32104
Uzbekistan_BA_Bustan	Greece_Minoan_Lassithi	Mbuti.DG	0.257167	0.002634	663488
Uzbekistan_BA_Bustan	Greece_Minoan_Odigitria	Mbuti.DG	0.25724	0.00305	181650
Uzbekistan_BA_Bustan	Hungary_EBA_BellBeaker	Mbuti.DG	0.258595	0.002625	731190
Uzbekistan_BA_Bustan	Hungary_EBA_BellBeaker_o	Mbuti.DG	0.254934	0.00276	571364
Uzbekistan_BA_Bustan	Hungary_EBA_Mako	Mbuti.DG	0.257135	0.00284	542722
Uzbekistan_BA_Bustan	Hungary_EBA_Protonagyrev	Mbuti.DG	0.257045	0.002815	542989
Uzbekistan_BA_Bustan	Hungary_LC_EBA_Baden_Yamnaya	Mbuti.DG	0.254673	0.002708	593863
Uzbekistan_BA_Bustan	Hungary_Maros_EBA.SG	Mbuti.DG	0.250786	0.002802	281862
Uzbekistan_BA_Bustan	Kazakhstan_EBA_Yamnaya.SG	Mbuti.DG	0.259795	0.002855	691105
Uzbekistan_BA_Bustan	Kazakhstan_Mereke_MBA	Mbuti.DG	0.260965	0.00267	648648
Uzbekistan_BA_Bustan	Iberia_BA	Mbuti.DG	0.256203	0.002599	763783
Uzbekistan_BA_Bustan	Iberia_BA.SG	Mbuti.DG	0.251632	0.002722	626599
Uzbekistan_BA_Bustan	Iberia_BA_Cogotas	Mbuti.DG	0.255441	0.002842	365704
Uzbekistan_BA_Bustan	Iberia_BA_published	Mbuti.DG	0.259617	0.003056	285888
Uzbekistan_BA_Bustan	Iberia_BellBeaker	Mbuti.DG	0.255389	0.002619	731287
Uzbekistan_BA_Bustan	Iberia_BellBeaker_o	Mbuti.DG	0.256972	0.005665	22635
Uzbekistan_BA_Bustan	Iberia_BellBeaker_o_published	Mbuti.DG	0.218982	0.002973	461415
Uzbekistan_BA_Bustan	Iberia_BellBeaker_published	Mbuti.DG	0.257031	0.003378	129146
Uzbekistan_BA_Bustan	Iberia_EBA	Mbuti.DG	0.255347	0.002916	349065
Uzbekistan_BA_Bustan	Iberia_North_BA_Africa_published	Mbuti.DG	0.251267	0.00297	244235
Uzbekistan_BA_Bustan	Iran_BA_HajjiFiruz	Mbuti.DG	0.262529	0.002805	582268
Uzbekistan_BA_Bustan	Iran_BA2_ShahrISokhta	Mbuti.DG	0.25995	0.002894	415098
Uzbekistan_BA_Bustan	Iran_BA2_ShahrISokhta_published	Mbuti.DG	0.251671	0.002608	580918
Uzbekistan_BA_Bustan	Ireland_BA.SG	Mbuti.DG	0.254764	0.002645	716471
Uzbekistan_BA_Bustan	Italy_North_BellBeaker	Mbuti.DG	0.256328	0.002606	617779
Uzbekistan_BA_Bustan	Italy_North_Remedello_EBA.SG	Mbuti.DG	0.253633	0.00339	118604
Uzbekistan_BA_Bustan	Jordan_EBA	Mbuti.DG	0.253985	0.002631	605758
Uzbekistan_BA_Bustan	Kazakhstan_BA_Zevakinskiy	Mbuti.DG	0.258541	0.002901	419458
Uzbekistan_BA_Bustan	Kazakhstan_Botai.SG	Mbuti.DG	0.252153	0.00296	627249
Uzbekistan_BA_Bustan	Kazakhstan_CentralSteppe_EMBA.SG	Mbuti.DG	0.24565	0.002694	708538
Uzbekistan_BA_Bustan	Kazakhstan_Eneolithic_Botai.SG	Mbuti.DG	0.252075	0.002754	707804
Uzbekistan_BA_Bustan	Kazakhstan_Georgievsky_MBA_published	Mbuti.DG	0.262	0.002864	425226
Uzbekistan_BA_Bustan	Kazakhstan_Chanchar_MBA_published	Mbuti.DG	0.260575	0.002798	505327
Uzbekistan_BA_Bustan	Kazakhstan_Dali_EBA	Mbuti.DG	0.25847	0.002802	528260
Uzbekistan_BA_Bustan	Russia_Afanasievo	Mbuti.DG	0.262268	0.002603	769072
Uzbekistan_BA_Bustan	Russia_Afanasievo.SG	Mbuti.DG	0.257935	0.002701	557324
Uzbekistan_BA_Bustan	Kazakhstan_Kanai_MBA	Mbuti.DG	0.250603	0.003583	94665
Uzbekistan_BA_Bustan	Kazakhstan_Kumsay_EBA	Mbuti.DG	0.261632	0.002669	652206
Uzbekistan_BA_Bustan	Russia_Caucasus_EBA_Yamnaya	Mbuti.DG	0.261106	0.002712	554042
Uzbekistan_BA_Bustan	Russia_EBA_Yamnaya_Kalmykia.SG	Mbuti.DG	0.255841	0.002681	687025
Uzbekistan_BA_Bustan	Russia_EBA_Yamnaya_Samara	Mbuti.DG	0.261049	0.002618	722668
Uzbekistan_BA_Bustan	Russia_EBA_Yamnaya_Samara_published2	Mbuti.DG	0.259076	0.002873	672953
Uzbekistan_BA_Bustan	Russia_Kalmykia_EBA_Yamnaya.SG	Mbuti.DG	0.259673	0.002959	297039
Uzbekistan_BA_Bustan	Ukraine_BA_Catacomb.SG	Mbuti.DG	0.257001	0.003746	100370
Uzbekistan_BA_Bustan	Ukraine_EBA_Yamnaya	Mbuti.DG	0.26101	0.002868	545501
Uzbekistan_BA_Bustan	Ukraine_EBA_Yamnaya.SG	Mbuti.DG	0.258288	0.003764	80422
Uzbekistan_BA_Bustan	Ukraine_EBA_Yamnaya_published	Mbuti.DG	0.258525	0.004997	32496
Uzbekistan_BA_Bustan	Ukraine_Ozera_EBA_Yamnaya	Mbuti.DG	0.261004	0.003009	411551
Uzbekistan_BA_Bustan	Latvia_BA	Mbuti.DG	0.258741	0.002603	725683
Uzbekistan_BA_Bustan	Nepal_Chokhopani_2700BP.SG	Mbuti.DG	0.225811	0.002785	692113
Uzbekistan_BA_Bustan	Nepal_Mebrak_2125BP.SG	Mbuti.DG	0.225833	0.002892	476988
Uzbekistan_BA_Bustan	Netherlands_BA	Mbuti.DG	0.259384	0.002751	589809
Uzbekistan_BA_Bustan	Netherlands_BellBeaker	Mbuti.DG	0.260071	0.002597	690934
Uzbekistan_BA_Bustan	Netherlands_BellBeaker_published	Mbuti.DG	0.257655	0.006155	20413
Uzbekistan_BA_Bustan	Poland_BellBeaker	Mbuti.DG	0.259262	0.002625	667760
Uzbekistan_BA_Bustan	Poland_BellBeaker_published	Mbuti.DG	0.25917	0.003812	73330
Uzbekistan_BA_Bustan	Poland_CWC_o.SG	Mbuti.DG	0.254229	0.002732	697126
Uzbekistan_BA_Bustan	Poland_EBA	Mbuti.DG	0.257836	0.002818	534908
Uzbekistan_BA_Bustan	Poland_EBA.SG	Mbuti.DG	0.255812	0.002843	633403
Uzbekistan_BA_Bustan	Poland_Unetice_EBA.SG	Mbuti.DG	0.254709	0.002828	473205
Uzbekistan_BA_Bustan	Russia_BA_Okunevo.SG	Mbuti.DG	0.246329	0.00256	753512
Uzbekistan_BA_Bustan	Russia_Caucasus_KuraAraxes	Mbuti.DG	0.259504	0.00272	526989
Uzbekistan_BA_Bustan	Russia_Caucasus_LateMaikop	Mbuti.DG	0.26237	0.002852	541930
Uzbekistan_BA_Bustan	Russia_Caucasus_Maikop	Mbuti.DG	0.263617	0.003053	280613
Uzbekistan_BA_Bustan	Russia_Caucasus_Maikop_Novosvobodnaya	Mbuti.DG	0.264187	0.002733	525730
Uzbekistan_BA_Bustan	Russia_EBA.SG	Mbuti.DG	0.254018	0.003387	134374
Uzbekistan_BA_Bustan	Russia_Kurma_EBA.SG	Mbuti.DG	0.234788	0.002824	414821
Uzbekistan_BA_Bustan	Russia_Kurma_EBA_o.SG	Mbuti.DG	0.230726	0.003669	94652
Uzbekistan_BA_Bustan	Russia_LateMaikop	Mbuti.DG	0.261674	0.00287	497365
Uzbekistan_BA_Bustan	Russia_Shamanka_EBA.SG	Mbuti.DG	0.232313	0.002655	640141
Uzbekistan_BA_Bustan	Russia_Steppe_Maikop	Mbuti.DG	0.260311	0.00261	670324
Uzbekistan_BA_Bustan	Russia_Steppe_Maikop_o	Mbuti.DG	0.259927	0.002874	352036
Uzbekistan_BA_Bustan	Russia_UstIda_EBA.SG	Mbuti.DG	0.23281	0.002719	520837
Uzbekistan_BA_Bustan	Scotland_BellBeaker	Mbuti.DG	0.257646	0.002678	566849
Uzbekistan_BA_Bustan	Scotland_C_EBA	Mbuti.DG	0.257907	0.00265	649598
Uzbekistan_BA_Bustan	Scotland_C_EBA_published	Mbuti.DG	0.256856	0.002881	425107
Uzbekistan_BA_Bustan	Switzerland_BellBeaker	Mbuti.DG	0.25731	0.003027	188564
Uzbekistan_BA_Bustan	Iran_BA1_ShahrISokhta	Mbuti.DG	0.265066	0.002629	647651
Uzbekistan_BA_Bustan	Iran_BA3_ShahrISokhta	Mbuti.DG	0.259324	0.00425	50124
Uzbekistan_BA_Bustan	Tajikistan_BA_DashtiKozy	Mbuti.DG	0.260422	0.002731	655556
Uzbekistan_BA_Bustan	Turkmenistan_EBA_Parkhai	Mbuti.DG	0.266704	0.002917	575660
Uzbekistan_BA_Bustan	Turkmenistan_Gonur_BA_1	Mbuti.DG	0.266048	0.002604	650860
Uzbekistan_BA_Bustan	Turkmenistan_Gonur_BA_1_o	Mbuti.DG	0.26384	0.003315	165747
Uzbekistan_BA_Bustan	Turkmenistan_Gonur_BA_1_o2	Mbuti.DG	0.255897	0.004524	40407
Uzbekistan_BA_Bustan	Turkmenistan_Gonur_BA_3	Mbuti.DG	0.268127	0.003808	74982
Uzbekistan_BA_Bustan	Turkmenistan_Gonur_BA_2	Mbuti.DG	0.25819	0.003125	217884
Uzbekistan_BA_Bustan	Turkmenistan_Gonur_BA_2_published	Mbuti.DG	0.255526	0.003346	149748
Uzbekistan_BA_Bustan	Turkmenistan_Gonur_BA_4	Mbuti.DG	0.265451	0.003949	75016
Uzbekistan_BA_Bustan	Turkmenistan_Gonur_BA_published	Mbuti.DG	0.261815	0.018864	1974
Uzbekistan_BA_Bustan	Uzbekistan_BA_Bustan_o1	Mbuti.DG	0.262085	0.00288	468696
Uzbekistan_BA_Bustan	Uzbekistan_BA_Bustan_o2	Mbuti.DG	0.254016	0.002882	522849
Uzbekistan_BA_Bustan	Uzbekistan_BA_Dzharkutan1	Mbuti.DG	0.265531	0.002621	708434
Uzbekistan_BA_Bustan	Uzbekistan_BA_Dzharkutan2	Mbuti.DG	0.258581	0.002729	650736
Uzbekistan_BA_Bustan	Uzbekistan_BA_Kashkarchi	Mbuti.DG	0.260645	0.002793	529821
Uzbekistan_BA_Bustan	Ukraine_EBA_GlobularAmphora	Mbuti.DG	0.252267	0.002749	602166
Uzbekistan_BA_Bustan	Ukraine_EBA_published	Mbuti.DG	0.253546	0.002858	406284
Uzbekistan_BA_Bustan	UstBelaya_EBA.SG	Mbuti.DG	0.233634	0.002633	700023
Uzbekistan_BA_Bustan	Uzbekistan_BA_Kokcha	Mbuti.DG	0.259827	0.002749	614783
Uzbekistan_BA_Bustan	Uzbekistan_BA_SappaliTepe	Mbuti.DG	0.264154	0.00262	747197
Uzbekistan_BA_Bustan	Uzbekistan_BA_SappaliTepe_o	Mbuti.DG	0.260586	0.003198	224863
Uzbekistan_BA_Bustan	Uzbekistan_BA_SappaliTepe2	Mbuti.DG	0.262938	0.002772	622821
Uzbekistan_BA_Bustan	Wales_C_EBA	Mbuti.DG	0.26064	0.002924	281981
Uzbekistan_BA_Bustan	Wales_EBA_published	Mbuti.DG	0.261294	0.00431	56051
Uzbekistan_BA_Bustan	Anatolia_Ottoman_1.SG	Mbuti.DG	0.244564	0.002982	329274
Uzbekistan_BA_Bustan	Anatolia_Ottoman_2.SG	Mbuti.DG	0.250083	0.003495	127279
Uzbekistan_BA_Bustan	Czech_EarlySlav.SG	Mbuti.DG	0.252111	0.005023	37316
Uzbekistan_BA_Bustan	England_Roman.SG	Mbuti.DG	0.255027	0.002567	730451
Uzbekistan_BA_Bustan	England_Roman_MiddleEast.SG	Mbuti.DG	0.243171	0.002969	463594
Uzbekistan_BA_Bustan	England_Saxon.SG	Mbuti.DG	0.256616	0.002606	754051
Uzbekistan_BA_Bustan	Estonia_Medieval.SG	Mbuti.DG	0.253284	0.002776	505871
Uzbekistan_BA_Bustan	Finland_Levanluhta	Mbuti.DG	0.25058	0.002831	385593
Uzbekistan_BA_Bustan	Finland_Levanluhta_B	Mbuti.DG	0.258785	0.00338	153389
Uzbekistan_BA_Bustan	Germany_EMedieval.SG	Mbuti.DG	0.255443	0.002562	755563
Uzbekistan_BA_Bustan	Germany_LRoman.SG	Mbuti.DG	0.254105	0.0028	647709
Uzbekistan_BA_Bustan	Hungary_Langobard	Mbuti.DG	0.258947	0.002569	761087
Uzbekistan_BA_Bustan	Hungary_Langobard.SG	Mbuti.DG	0.256343	0.002601	767507
Uzbekistan_BA_Bustan	Hungary_Medieval.SG	Mbuti.DG	0.257415	0.003187	214833
Uzbekistan_BA_Bustan	Iberia_Carolingian	Mbuti.DG	0.256365	0.002853	315873
Uzbekistan_BA_Bustan	Iberia_Hellenistic	Mbuti.DG	0.256287	0.002716	594475
Uzbekistan_BA_Bustan	Iberia_Hellenistic_B	Mbuti.DG	0.255283	0.003083	284125
Uzbekistan_BA_Bustan	Iberia_Islamic	Mbuti.DG	0.250185	0.002613	661990
Uzbekistan_BA_Bustan	Iberia_LRoman_Medieval	Mbuti.DG	0.246733	0.003884	63802
Uzbekistan_BA_Bustan	Iberia_Medieval	Mbuti.DG	0.254916	0.002771	538152
Uzbekistan_BA_Bustan	Iberia_Medieval_published	Mbuti.DG	0.255359	0.002838	363458
Uzbekistan_BA_Bustan	Iberia_Muslim_Almohade	Mbuti.DG	0.24706	0.003039	332438
Uzbekistan_BA_Bustan	Iberia_Muslim_Emirate	Mbuti.DG	0.245819	0.004683	43668
Uzbekistan_BA_Bustan	Iberia_Muslim_published	Mbuti.DG	0.186666	0.003875	60773
Uzbekistan_BA_Bustan	Iberia_Muslim_Zira	Mbuti.DG	0.248166	0.002607	637932
Uzbekistan_BA_Bustan	Iberia_NazariPeriod_LateMuslim	Mbuti.DG	0.241125	0.003377	154525
Uzbekistan_BA_Bustan	Iberia_NazariPeriod_Muslim	Mbuti.DG	0.246248	0.002616	614252
Uzbekistan_BA_Bustan	Iberia_NazariPeriod_Muslim_African	Mbuti.DG	0.176879	0.004095	72559
Uzbekistan_BA_Bustan	Iberia_NazariPeriod_Muslim_o_published	Mbuti.DG	0.251923	0.003938	70368
Uzbekistan_BA_Bustan	Iberia_NazariPeriod_Muslim_published	Mbuti.DG	0.246986	0.004727	38662
Uzbekistan_BA_Bustan	Iberia_Roman	Mbuti.DG	0.250922	0.002606	701432
Uzbekistan_BA_Bustan	Iberia_Roman_o	Mbuti.DG	0.256702	0.002712	609092
Uzbekistan_BA_Bustan	Iberia_Roman_o_published	Mbuti.DG	0.250665	0.006829	13852
Uzbekistan_BA_Bustan	Iberia_Roman_published	Mbuti.DG	0.252225	0.004977	39104
Uzbekistan_BA_Bustan	Iberia_Visigoth_Barcelona	Mbuti.DG	0.256928	0.002857	327131
Uzbekistan_BA_Bustan	Iberia_Visigoth_Girona	Mbuti.DG	0.256941	0.002628	586724
Uzbekistan_BA_Bustan	Iberia_Visigoth_Girona_o_published	Mbuti.DG	0.254001	0.005752	21710
Uzbekistan_BA_Bustan	Iberia_Visigoth_Girona_published	Mbuti.DG	0.260952	0.003088	168557
Uzbekistan_BA_Bustan	Iberia_Visigoth_Granada	Mbuti.DG	0.249999	0.0026	651789
Uzbekistan_BA_Bustan	Iberia_Visigoth_Granada_o_published	Mbuti.DG	0.24915	0.003676	89924
Uzbekistan_BA_Bustan	Iberia_Visigoth_Granada_published	Mbuti.DG	0.251089	0.004046	50779
Uzbekistan_BA_Bustan	Iceland_Early_Christian.SG	Mbuti.DG	0.253882	0.002866	388673
Uzbekistan_BA_Bustan	Iceland_Pre_Christian.SG	Mbuti.DG	0.253874	0.002589	769312
Uzbekistan_BA_Bustan	India_RoopkundA	Mbuti.DG	0.248226	0.002556	709031
Uzbekistan_BA_Bustan	India_RoopkundB	Mbuti.DG	0.257804	0.002579	716697
Uzbekistan_BA_Bustan	India_RoopkundC	Mbuti.DG	0.228645	0.00296	285304
Uzbekistan_BA_Bustan	Indian_GreatAndaman_100BP.SG	Mbuti.DG	0.223913	0.002754	688011
Uzbekistan_BA_Bustan	Iran_Historic_GanjDareh	Mbuti.DG	0.260441	0.002804	534676
Uzbekistan_BA_Bustan	Italy_Imperial.SG	Mbuti.DG	0.25542	0.002541	803291
Uzbekistan_BA_Bustan	Italy_Imperial_oAfrican.SG	Mbuti.DG	0.238247	0.00299	558976
Uzbekistan_BA_Bustan	Italy_Imperial_oCentralEuropean.SG	Mbuti.DG	0.25445	0.002666	618806
Uzbekistan_BA_Bustan	Italy_LA.SG	Mbuti.DG	0.255003	0.002574	768922
Uzbekistan_BA_Bustan	Italy_LA_oCentralEuropean.SG	Mbuti.DG	0.255796	0.002568	735727
Uzbekistan_BA_Bustan	Italy_LA_oSardiniaLike.SG	Mbuti.DG	0.251173	0.002881	419759
Uzbekistan_BA_Bustan	Italy_Medieval_EarlyModern.SG	Mbuti.DG	0.255142	0.002546	774209
Uzbekistan_BA_Bustan	Italy_Medieval_EarlyModern_oCentralEuropean.SG	Mbuti.DG	0.256304	0.002583	758641
Uzbekistan_BA_Bustan	Italy_North_EarlyMedieval_Langobards	Mbuti.DG	0.257995	0.002576	765011
Uzbekistan_BA_Bustan	Kazakhstan_His.SG	Mbuti.DG	0.255578	0.004078	63918
Uzbekistan_BA_Bustan	Kazakhstan_Kangju.SG	Mbuti.DG	0.255027	0.002595	694870
Uzbekistan_BA_Bustan	Kazakhstan_Karakhanid.SG	Mbuti.DG	0.241185	0.002726	575759
Uzbekistan_BA_Bustan	Kazakhstan_Karluk.SG	Mbuti.DG	0.244429	0.002712	683894
Uzbekistan_BA_Bustan	Kazakhstan_Kimak.SG	Mbuti.DG	0.24918	0.003404	122074
Uzbekistan_BA_Bustan	Kazakhstan_GoldenHordeAsian.SG	Mbuti.DG	0.231604	0.002855	648393
Uzbekistan_BA_Bustan	Kazakhstan_Kipchak1.SG	Mbuti.DG	0.245559	0.002797	452939
Uzbekistan_BA_Bustan	Kazakhstan_Kipchak2.SG	Mbuti.DG	0.241852	0.002827	544727
Uzbekistan_BA_Bustan	Kazakhstan_OutTianShanHun.SG	Mbuti.DG	0.234562	0.003065	224211
Uzbekistan_BA_Bustan	Kazakhstan_OutTurk.SG	Mbuti.DG	0.254159	0.002901	353383
Uzbekistan_BA_Bustan	Kazakhstan_Turk.SG	Mbuti.DG	0.245503	0.002718	624758
Uzbekistan_BA_Bustan	Kazakhstan_Wusun.SG	Mbuti.DG	0.255656	0.002732	645608
Uzbekistan_BA_Bustan	Kazakhstan_Wusun_2.SG	Mbuti.DG	0.252903	0.002885	387685
Uzbekistan_BA_Bustan	Kyrgyzstan_Nomad_modern.SG	Mbuti.DG	0.250086	0.002922	420050
Uzbekistan_BA_Bustan	Kyrgyzstan_TianShanHun.SG	Mbuti.DG	0.248739	0.00255	772619
Uzbekistan_BA_Bustan	Kyrgyzstan_Turk.SG	Mbuti.DG	0.238081	0.003125	211678
Uzbekistan_BA_Bustan	Kazakhstan_Medieval_Nomad.SG	Mbuti.DG	0.240377	0.002721	617900
Uzbekistan_BA_Bustan	Kazakhstan_GoldenHordeEuro.SG	Mbuti.DG	0.253716	0.003006	398976
Uzbekistan_BA_Bustan	Kazakhstan_Nomad_HP.SG	Mbuti.DG	0.231787	0.002659	676908
Uzbekistan_BA_Bustan	Kazakhstan_Nomad_Hun_Sarmatian.SG	Mbuti.DG	0.230779	0.002747	588569
Uzbekistan_BA_Bustan	Kyrgyzstan_Medieval_Nomad.SG	Mbuti.DG	0.233326	0.002638	689772
Uzbekistan_BA_Bustan	Lebanon_Medieval.SG	Mbuti.DG	0.251508	0.002696	697699
Uzbekistan_BA_Bustan	Lebanon_Medieval_o1.SG	Mbuti.DG	0.242747	0.002909	652140
Uzbekistan_BA_Bustan	Lebanon_Medieval_o2.SG	Mbuti.DG	0.253284	0.002816	457879
Uzbekistan_BA_Bustan	Lebanon_Medieval_o3.SG	Mbuti.DG	0.253681	0.003056	252920
Uzbekistan_BA_Bustan	Lebanon_Medieval_o4.SG	Mbuti.DG	0.257345	0.002896	677794
Uzbekistan_BA_Bustan	Lebanon_Medieval_o6.SG	Mbuti.DG	0.253179	0.003138	227733
Uzbekistan_BA_Bustan	Lebanon_Roman.SG	Mbuti.DG	0.253263	0.002636	693634
Uzbekistan_BA_Bustan	Lithuania_Late_Antiquity.SG	Mbuti.DG	0.257145	0.004203	63583
Uzbekistan_BA_Bustan	Pakistan_H_Aligrama	Mbuti.DG	0.255411	0.002699	703751
Uzbekistan_BA_Bustan	Pakistan_H_Barikot	Mbuti.DG	0.255939	0.002688	668903
Uzbekistan_BA_Bustan	Pakistan_H_Butkara	Mbuti.DG	0.255658	0.002652	609679
Uzbekistan_BA_Bustan	Pakistan_H_SaiduSharif	Mbuti.DG	0.256165	0.002574	752170
Uzbekistan_BA_Bustan	Pakistan_H_SaiduSharif_o	Mbuti.DG	0.248412	0.002797	570173
Uzbekistan_BA_Bustan	Pakistan_Medieval_Barikot2	Mbuti.DG	0.252624	0.002847	593281
Uzbekistan_BA_Bustan	Pakistan_Medieval_Parwak	Mbuti.DG	0.260074	0.004033	60891
Uzbekistan_BA_Bustan	Pakistan_Medieval_RajaGira	Mbuti.DG	0.254956	0.002778	587187
Uzbekistan_BA_Bustan	Pakistan_Medieval_Singoor	Mbuti.DG	0.256696	0.002946	364870
Uzbekistan_BA_Bustan	Pakistan_Medieval_Udegram_Ghaznavid	Mbuti.DG	0.25963	0.002866	428668
Uzbekistan_BA_Bustan	Russia_Alan.SG	Mbuti.DG	0.25777	0.00267	712273
Uzbekistan_BA_Bustan	Russia_Alan_o.SG	Mbuti.DG	0.249995	0.004347	54794
Uzbekistan_BA_Bustan	Russia_Chalmny_Varre	Mbuti.DG	0.250285	0.002762	532837
Uzbekistan_BA_Bustan	Russia_Medieval_Nomad.SG	Mbuti.DG	0.247833	0.002863	412756
Uzbekistan_BA_Bustan	Russia_Medieval_UstBelaya_Angara	Mbuti.DG	0.235896	0.003151	178751
Uzbekistan_BA_Bustan	Russia_OldBeringSea_Ekven	Mbuti.DG	0.236516	0.002605	746777
Uzbekistan_BA_Bustan	Russia_OldBeringSea_Uelen	Mbuti.DG	0.236084	0.002678	667287
Uzbekistan_BA_Bustan	Russia_OldBeringSea_Uelen_published	Mbuti.DG	0.235431	0.002806	364868
Uzbekistan_BA_Bustan	Russia_SaltovoMayaki.SG	Mbuti.DG	0.258847	0.004066	64013
Uzbekistan_BA_Bustan	Serbia_Medieval_Gepidian.SG	Mbuti.DG	0.246566	0.003167	234941
Uzbekistan_BA_Bustan	Slovakia_Poprad.SG	Mbuti.DG	0.256693	0.003038	291269
Uzbekistan_BA_Bustan	Sweden_Viking.SG	Mbuti.DG	0.255075	0.002571	767868
Uzbekistan_BA_Bustan	UstBelaya_MED.SG	Mbuti.DG	0.230713	0.004038	61351
Uzbekistan_BA_Bustan	Yana_Medieval.SG	Mbuti.DG	0.231367	0.002833	573739
Uzbekistan_BA_Bustan	Anatolia_IA.SG	Mbuti.DG	0.250989	0.002856	335023
Uzbekistan_BA_Bustan	Bulgaria_IA	Mbuti.DG	0.259258	0.002889	482780
Uzbekistan_BA_Bustan	Croatia_EIA	Mbuti.DG	0.260922	0.002851	541233
Uzbekistan_BA_Bustan	Czech_HallstattBylany.SG	Mbuti.DG	0.252623	0.002842	403610
Uzbekistan_BA_Bustan	Ekven_IA.SG	Mbuti.DG	0.233015	0.00261	725088
Uzbekistan_BA_Bustan	England_IA.SG	Mbuti.DG	0.25878	0.002968	369742
Uzbekistan_BA_Bustan	England_LIA.SG	Mbuti.DG	0.257081	0.002716	697602
Uzbekistan_BA_Bustan	England_LIA_ERoman.SG	Mbuti.DG	0.256566	0.00303	399466
Uzbekistan_BA_Bustan	Estonia_IA.SG	Mbuti.DG	0.252749	0.002646	550693
Uzbekistan_BA_Bustan	Hungary_AvarPeriod	Mbuti.DG	0.257493	0.002829	539437
Uzbekistan_BA_Bustan	Hungary_AvarPeriod.SG	Mbuti.DG	0.254977	0.002851	691253
Uzbekistan_BA_Bustan	Iberia_Celtiberian	Mbuti.DG	0.257809	0.002752	630154
Uzbekistan_BA_Bustan	Iberia_Greek	Mbuti.DG	0.257321	0.003105	209416
Uzbekistan_BA_Bustan	Iberia_Greek1	Mbuti.DG	0.253021	0.0052	28555
Uzbekistan_BA_Bustan	Iberia_Greek2	Mbuti.DG	0.246416	0.002814	541500
Uzbekistan_BA_Bustan	Iberia_IA	Mbuti.DG	0.256473	0.002675	588600
Uzbekistan_BA_Bustan	Iberia_IA_PreIberian_published	Mbuti.DG	0.259802	0.003733	88767
Uzbekistan_BA_Bustan	Iberia_Iberian	Mbuti.DG	0.25703	0.00268	549292
Uzbekistan_BA_Bustan	Iberia_Iberian_published	Mbuti.DG	0.255387	0.002782	402382
Uzbekistan_BA_Bustan	Ibiza_Punic.SG	Mbuti.DG	0.246104	0.003261	206239
Uzbekistan_BA_Bustan	Iran_IA_HajjiFiruz	Mbuti.DG	0.263435	0.002999	331392
Uzbekistan_BA_Bustan	Iran_IA_Hasanlu.SG	Mbuti.DG	0.256443	0.002883	601867
Uzbekistan_BA_Bustan	Israel_IA1_Ashkelon	Mbuti.DG	0.256784	0.002818	303238
Uzbekistan_BA_Bustan	Israel_IA2_Ashkelon	Mbuti.DG	0.251187	0.002795	353892
Uzbekistan_BA_Bustan	Italy_IA_Republic.SG	Mbuti.DG	0.256321	0.002571	739334
Uzbekistan_BA_Bustan	Italy_IA_Republic_oEasternMediterranean.SG	Mbuti.DG	0.252905	0.002619	680280
Uzbekistan_BA_Bustan	Kazakhstan_IA_Berel_Pazyryk	Mbuti.DG	0.241792	0.002656	664924
Uzbekistan_BA_Bustan	Kazakhstan_IA_Chanchar_published	Mbuti.DG	0.258706	0.002838	490846
Uzbekistan_BA_Bustan	Kazakhstan_IA_Tasbas	Mbuti.DG	0.255946	0.003027	354021
Uzbekistan_BA_Bustan	Kazakhstan_IA_ZevakinoChilikta_1.SG	Mbuti.DG	0.248195	0.003663	86344
Uzbekistan_BA_Bustan	Kazakhstan_IA_ZevakinoChilikta_2.SG	Mbuti.DG	0.24537	0.003157	187612
Uzbekistan_BA_Bustan	Kazakhstan_CentralTasmola_o1.SG	Mbuti.DG	0.259577	0.004442	55162
Uzbekistan_BA_Bustan	Kazakhstan_CentralTasmola_o2.SG	Mbuti.DG	0.241236	0.007043	13701
Uzbekistan_BA_Bustan	Kazakhstan_EIA_Birlik.SG	Mbuti.DG	0.244237	0.006556	16414
Uzbekistan_BA_Bustan	Kazakhstan_LIA_Georgievsky_published	Mbuti.DG	0.258011	0.00284	497479
Uzbekistan_BA_Bustan	Kazakhstan_Nomad_IA.SG	Mbuti.DG	0.250004	0.002685	689445
Uzbekistan_BA_Bustan	Kazakhstan_TianShanSaka.SG	Mbuti.DG	0.254285	0.004782	41556
Uzbekistan_BA_Bustan	Hungary_Prescythian_IA.SG	Mbuti.DG	0.25405	0.002849	466137
Uzbekistan_BA_Bustan	Hungary_Scythian.SG	Mbuti.DG	0.252428	0.002697	653163
Uzbekistan_BA_Bustan	Kazakhstan_Sarmatian.SG	Mbuti.DG	0.253868	0.002699	518999
Uzbekistan_BA_Bustan	Kyrgyzstan_OutTianShanSaka.SG	Mbuti.DG	0.247597	0.002889	478725
Uzbekistan_BA_Bustan	Moldova_Cimmerian.SG	Mbuti.DG	0.248574	0.002768	455775
Uzbekistan_BA_Bustan	Kyrgyzstan_TianShanSaka.SG	Mbuti.DG	0.253315	0.00257	715823
Uzbekistan_BA_Bustan	Russia_Tagar.SG	Mbuti.DG	0.251667	0.002634	728710
Uzbekistan_BA_Bustan	Moldova_Scythian.SG	Mbuti.DG	0.255296	0.00263	675956
Uzbekistan_BA_Bustan	Moldova_Scythian_o1.SG	Mbuti.DG	0.247448	0.006151	21922
Uzbekistan_BA_Bustan	Moldova_Scythian_o2.SG	Mbuti.DG	0.257763	0.002803	475017
Uzbekistan_BA_Bustan	Mongolia_XiongNu_WE.SG	Mbuti.DG	0.24389	0.002727	634984
Uzbekistan_BA_Bustan	Russia_Early_Sarmatian.SG	Mbuti.DG	0.26196	0.003513	101614
Uzbekistan_BA_Bustan	Mongolia_XiongNu.SG	Mbuti.DG	0.226644	0.00262	715485
Uzbekistan_BA_Bustan	Russia_EarlySarmatian_SouthernUrals.SG	Mbuti.DG	0.255144	0.002665	536634
Uzbekistan_BA_Bustan	Montenegro_IA.SG	Mbuti.DG	0.244332	0.008332	9562
Uzbekistan_BA_Bustan	Pakistan_IA_Aligrama2	Mbuti.DG	0.252993	0.0028	464236
Uzbekistan_BA_Bustan	Pakistan_IA_Aligrama2_published	Mbuti.DG	0.25325	0.002672	624226
Uzbekistan_BA_Bustan	Pakistan_IA_Arkotkila	Mbuti.DG	0.25681	0.003241	171099
Uzbekistan_BA_Bustan	Pakistan_IA_Barikot	Mbuti.DG	0.25698	0.002644	561914
Uzbekistan_BA_Bustan	Pakistan_IA_Butkara	Mbuti.DG	0.256316	0.002622	630940
Uzbekistan_BA_Bustan	Pakistan_IA_Gogdara	Mbuti.DG	0.256868	0.002708	595107
Uzbekistan_BA_Bustan	Pakistan_IA_Katelai	Mbuti.DG	0.257778	0.002545	752284
Uzbekistan_BA_Bustan	Pakistan_IA_Katelai_published	Mbuti.DG	0.256439	0.002626	614777
Uzbekistan_BA_Bustan	Pakistan_IA_Loebanr	Mbuti.DG	0.257581	0.00257	779576
Uzbekistan_BA_Bustan	Pakistan_IA_Loebanr_o_published	Mbuti.DG	0.25742	0.002871	462784
Uzbekistan_BA_Bustan	Pakistan_IA_Loebanr_published	Mbuti.DG	0.257219	0.002647	625672
Uzbekistan_BA_Bustan	Pakistan_IA_Udegram	Mbuti.DG	0.258933	0.00259	740738
Uzbekistan_BA_Bustan	Pakistan_IA_Udegram_o	Mbuti.DG	0.260937	0.004841	32108
Uzbekistan_BA_Bustan	Russia_IA_EarlySarmatian	Mbuti.DG	0.258661	0.002771	468135
Uzbekistan_BA_Bustan	Russia_IA_Scythian_questionable	Mbuti.DG	0.254919	0.00285	581562
Uzbekistan_BA_Bustan	Russia_Late_Sarmatian.SG	Mbuti.DG	0.255323	0.002658	684157
Uzbekistan_BA_Bustan	Russia_MiddleSarmatian_SouthernUrals.SG	Mbuti.DG	0.257414	0.003012	316880
Uzbekistan_BA_Bustan	Russia_Sarmatian.SG	Mbuti.DG	0.254177	0.002635	608100
Uzbekistan_BA_Bustan	Russia_EasternScythian_SouthernUrals.SG	Mbuti.DG	0.247843	0.003188	238357
Uzbekistan_BA_Bustan	Russia_EasternScythian_SouthernUrals_o.SG	Mbuti.DG	0.25563	0.005875	21659
Uzbekistan_BA_Bustan	Ukraine_Chernyakhiv.SG	Mbuti.DG	0.253534	0.003032	175326
Uzbekistan_BA_Bustan	Ukraine_Chernyakhiv_o.SG	Mbuti.DG	0.258664	0.007843	11809
Uzbekistan_BA_Bustan	Ukraine_Cimmerians.SG	Mbuti.DG	0.257223	0.003382	135517
Uzbekistan_BA_Bustan	Ukraine_Cimmerians_o1.SG	Mbuti.DG	0.259585	0.003706	110605
Uzbekistan_BA_Bustan	Russia_IA.SG	Mbuti.DG	0.246995	0.002592	720099
Uzbekistan_BA_Bustan	Ukraine_Cimmerians_o2.SG	Mbuti.DG	0.250977	0.003339	150902
Uzbekistan_BA_Bustan	Ukraine_IA_WesternScythian.SG	Mbuti.DG	0.257192	0.002745	475622
Uzbekistan_BA_Bustan	Ukraine_IA_WesternScythian_o.SG	Mbuti.DG	0.253234	0.003283	185236
Uzbekistan_BA_Bustan	Ukraine_Scythian.SG	Mbuti.DG	0.254548	0.00275	661501
Uzbekistan_BA_Bustan	Ukraine_Scythian.WGC	Mbuti.DG	0.252395	0.008046	11355
Uzbekistan_BA_Bustan	Russia_Tuva_IA_AldyBel	Mbuti.DG	0.252003	0.002798	559542
Uzbekistan_BA_Bustan	Russia_Uelen_IA.SG	Mbuti.DG	0.234843	0.005576	25806
Uzbekistan_BA_Bustan	Saami_IA.SG	Mbuti.DG	0.249552	0.004116	67245
Uzbekistan_BA_Bustan	Sweden_IA.SG	Mbuti.DG	0.253367	0.002831	429216
Uzbekistan_BA_Bustan	Tajikistan_Ksirov_Kushan	Mbuti.DG	0.258373	0.002768	503244
Uzbekistan_BA_Bustan	Turkmenistan_IA.SG	Mbuti.DG	0.256946	0.002825	574463
Uzbekistan_BA_Bustan	Croatia_Mesolithic_HG	Mbuti.DG	0.251587	0.003176	249953
Uzbekistan_BA_Bustan	England_Mesolithic	Mbuti.DG	0.247308	0.002758	545376
Uzbekistan_BA_Bustan	England_Mesolithic_all.SG	Mbuti.DG	0.245522	0.002799	674239
Uzbekistan_BA_Bustan	Iran_Mesolithic_BeltCave_all_published	Mbuti.DG	0.272955	0.006412	21401
Uzbekistan_BA_Bustan	Iran_Mesolithic_HotuIIIb_all_published	Mbuti.DG	0.260768	0.003555	99693
Uzbekistan_BA_Bustan	Israel_Natufian	Mbuti.DG	0.235241	0.002836	342131
Uzbekistan_BA_Bustan	Israel_Natufian_published	Mbuti.DG	0.228377	0.003727	63804
Uzbekistan_BA_Bustan	Italy_Mesolithic.SG	Mbuti.DG	0.245778	0.00271	706857
Uzbekistan_BA_Bustan	Kolyma_M.SG	Mbuti.DG	0.232485	0.002877	692498
Uzbekistan_BA_Bustan	Lithuania_Mesolithic	Mbuti.DG	0.25063	0.002874	453388
Uzbekistan_BA_Bustan	Norway_Mesolithic.SG	Mbuti.DG	0.250438	0.002757	673010
Uzbekistan_BA_Bustan	Portugal_Geometric_Mesolithic	Mbuti.DG	0.243623	0.003483	120081
Uzbekistan_BA_Bustan	Romania_Mesolithic	Mbuti.DG	0.253467	0.003033	290349
Uzbekistan_BA_Bustan	Romania_Mesolithic_IronGates	Mbuti.DG	0.249803	0.002656	694572
Uzbekistan_BA_Bustan	Romania_Mesolithic_IronGates.SG	Mbuti.DG	0.247704	0.002659	707127
Uzbekistan_BA_Bustan	Romania_Mesolithic_IronGates_published	Mbuti.DG	0.251431	0.002816	368830
Uzbekistan_BA_Bustan	Serbia_Mesolithic_IronGates	Mbuti.DG	0.250443	0.002567	772704
Uzbekistan_BA_Bustan	Serbia_Mesolithic_IronGates_o	Mbuti.DG	0.253906	0.002804	546749
Uzbekistan_BA_Bustan	Serbia_Mesolithic_IronGates_published	Mbuti.DG	0.250901	0.002677	664797
Uzbekistan_BA_Bustan	Sweden_HG.SG	Mbuti.DG	0.251002	0.004119	63089
Uzbekistan_BA_Bustan	Sweden_HG_Motala	Mbuti.DG	0.252738	0.002646	684940
Uzbekistan_BA_Bustan	Sweden_HG_Motala.SG	Mbuti.DG	0.24975	0.002839	619748
Uzbekistan_BA_Bustan	Sweden_Mesolithic.SG	Mbuti.DG	0.248821	0.002654	706217
Uzbekistan_BA_Bustan	Ukraine_Mesolithic	Mbuti.DG	0.253872	0.002629	645215
Uzbekistan_BA_Bustan	Ukraine_Mesolithic_published	Mbuti.DG	0.251019	0.004241	54397
Uzbekistan_BA_Bustan	Wales_Mesolithic	Mbuti.DG	0.247184	0.002967	243505
Uzbekistan_BA_Bustan	Afghanistan_DarraIKur_MBA	Mbuti.DG	0.26294	0.00554	25057
Uzbekistan_BA_Bustan	Anatolia_MLBA.SG	Mbuti.DG	0.254867	0.002655	679828
Uzbekistan_BA_Bustan	Armenia_LBA.SG	Mbuti.DG	0.256909	0.002823	348500
Uzbekistan_BA_Bustan	Armenia_LchashenMetsamor.SG	Mbuti.DG	0.258886	0.002755	518641
Uzbekistan_BA_Bustan	Armenia_MBA	Mbuti.DG	0.260923	0.002873	554454
Uzbekistan_BA_Bustan	Armenia_MBA.SG	Mbuti.DG	0.256915	0.003025	262265
Uzbekistan_BA_Bustan	Bulgaria_MLBA	Mbuti.DG	0.260205	0.002852	550599
Uzbekistan_BA_Bustan	Denmark_LBA.SG	Mbuti.DG	0.251032	0.004023	61601
Uzbekistan_BA_Bustan	England_LBA	Mbuti.DG	0.257211	0.003149	202218
Uzbekistan_BA_Bustan	England_MBA	Mbuti.DG	0.25956	0.002566	762294
Uzbekistan_BA_Bustan	Germany_LBA_Halberstadt_published	Mbuti.DG	0.25556	0.002834	606851
Uzbekistan_BA_Bustan	Germany_Lech_MBA	Mbuti.DG	0.255864	0.002935	293246
Uzbekistan_BA_Bustan	Greece_BA_Mycenaean	Mbuti.DG	0.243474	0.002877	268289
Uzbekistan_BA_Bustan	Greece_BA_Mycenaean_Pylos	Mbuti.DG	0.23502	0.00322	158253
Uzbekistan_BA_Bustan	Hungary_Hunyadihalom_MCHA	Mbuti.DG	0.25625	0.002847	428594
Uzbekistan_BA_Bustan	Hungary_LBA.SG	Mbuti.DG	0.25415	0.002759	691828
Uzbekistan_BA_Bustan	Iberia_LBA	Mbuti.DG	0.254608	0.005037	32442
Uzbekistan_BA_Bustan	Iberia_LBA_Cogotas	Mbuti.DG	0.25412	0.00271	650203
Uzbekistan_BA_Bustan	Iberia_MBA	Mbuti.DG	0.263304	0.006034	22409
Uzbekistan_BA_Bustan	Iberia_MBA.SG	Mbuti.DG	0.252147	0.002652	664417
Uzbekistan_BA_Bustan	Iberia_Tartessian	Mbuti.DG	0.249811	0.005404	26477
Uzbekistan_BA_Bustan	Iberia_Tartessian_published	Mbuti.DG	0.259233	0.004128	60732
Uzbekistan_BA_Bustan	India_Harappan_published	Mbuti.DG	0.240278	0.005492	22653
Uzbekistan_BA_Bustan	Israel_LBA_Ashkelon	Mbuti.DG	0.252462	0.002855	285766
Uzbekistan_BA_Bustan	Israel_MLBA	Mbuti.DG	0.254165	0.002862	422530
Uzbekistan_BA_Bustan	Israel_MLBA_published	Mbuti.DG	0.253036	0.005564	22164
Uzbekistan_BA_Bustan	Kazakhstan_MLBA_Dali	Mbuti.DG	0.259412	0.002738	612098
Uzbekistan_BA_Bustan	Kazakhstan_Andronovo.SG	Mbuti.DG	0.252033	0.003096	234813
Uzbekistan_BA_Bustan	Kazakhstan_CentralSaka.SG	Mbuti.DG	0.247125	0.002586	699227
Uzbekistan_BA_Bustan	Kazakhstan_LBA	Mbuti.DG	0.26156	0.003078	299080
Uzbekistan_BA_Bustan	Kazakhstan_LBA_Guruldek_published	Mbuti.DG	0.252992	0.00692	15318
Uzbekistan_BA_Bustan	Kazakhstan_LBA_Molaly	Mbuti.DG	0.254493	0.002881	499888
Uzbekistan_BA_Bustan	Kazakhstan_LBA_Tasbas	Mbuti.DG	0.223752	0.006498	14491
Uzbekistan_BA_Bustan	Kazakhstan_LBA_Zevakinskiy	Mbuti.DG	0.256398	0.00261	700231
Uzbekistan_BA_Bustan	Kazakhstan_MLBA_Fedorovo_Shoendykol	Mbuti.DG	0.256507	0.00279	558411
Uzbekistan_BA_Bustan	Kazakhstan_MLBA_Fedorovo_Shoindykol	Mbuti.DG	0.259871	0.002699	627177
Uzbekistan_BA_Bustan	Kazakhstan_MLBA_KazakhMys	Mbuti.DG	0.257816	0.002656	647807
Uzbekistan_BA_Bustan	Kazakhstan_MLBA_Zevakinskiy	Mbuti.DG	0.25782	0.002855	486149
Uzbekistan_BA_Bustan	Kyrgyzstan_BA_Aygirdjal	Mbuti.DG	0.260992	0.002732	560278
Uzbekistan_BA_Bustan	Kazakhstan_MLBA1_Kyzlbulak	Mbuti.DG	0.260785	0.002897	501767
Uzbekistan_BA_Bustan	Kazakhstan_MLBA1_Taldysay	Mbuti.DG	0.25901	0.002816	527864
Uzbekistan_BA_Bustan	Kazakhstan_MLBA2_Kyzlbulak	Mbuti.DG	0.261153	0.002921	528358
Uzbekistan_BA_Bustan	Kazakhstan_MLBA2_Taldysay	Mbuti.DG	0.25996	0.003105	256581
Uzbekistan_BA_Bustan	Kazakhstan_OutCentralSaka.SG	Mbuti.DG	0.255006	0.002941	287929
Uzbekistan_BA_Bustan	Lebanon_MLBA_Canaanite_MBA.SG	Mbuti.DG	0.250777	0.002572	723243
Uzbekistan_BA_Bustan	Lithuania_BA	Mbuti.DG	0.257224	0.002885	393797
Uzbekistan_BA_Bustan	Lithuania_LBA.SG	Mbuti.DG	0.253502	0.007619	11100
Uzbekistan_BA_Bustan	Magadan_BA.SG	Mbuti.DG	0.233436	0.002685	624296
Uzbekistan_BA_Bustan	Mongolia_Khovsgol_LBA	Mbuti.DG	0.237928	0.00254	752817
Uzbekistan_BA_Bustan	Montenegro_LBA.SG	Mbuti.DG	0.24997	0.006782	15760
Uzbekistan_BA_Bustan	Nepal_Samdzong_1500BP.SG	Mbuti.DG	0.22686	0.002624	720937
Uzbekistan_BA_Bustan	Pakistan_LBA_published	Mbuti.DG	0.246263	0.024259	1172
Uzbekistan_BA_Bustan	Pakistan_MBA_LIA_published	Mbuti.DG	0.250305	0.003656	94922
Uzbekistan_BA_Bustan	Kazakhstan_Sintashta_MLBA_o.SG	Mbuti.DG	0.259729	0.005165	34563
Uzbekistan_BA_Bustan	Russia_Bolshoy	Mbuti.DG	0.245943	0.00262	682530
Uzbekistan_BA_Bustan	Russia_Caucasus_LBA_Dolmen	Mbuti.DG	0.258799	0.004779	45413
Uzbekistan_BA_Bustan	Russia_Andronovo.SG	Mbuti.DG	0.255531	0.002657	713903
Uzbekistan_BA_Bustan	Russia_Karasuk.SG	Mbuti.DG	0.249573	0.002551	741893
Uzbekistan_BA_Bustan	Russia_LBA.SG	Mbuti.DG	0.23916	0.003294	138268
Uzbekistan_BA_Bustan	Russia_LBA_Priobrazhenka	Mbuti.DG	0.25626	0.003191	202174
Uzbekistan_BA_Bustan	Kazakhstan_MLBA_Aktogai	Mbuti.DG	0.259506	0.002599	684347
Uzbekistan_BA_Bustan	Russia_Karasuk_o.SG	Mbuti.DG	0.235766	0.002853	688909
Uzbekistan_BA_Bustan	Russia_MLBA_Krasnoyarsk	Mbuti.DG	0.259322	0.002562	746934
Uzbekistan_BA_Bustan	Kazakhstan_MLBA_Alakul_Lisakovskiy	Mbuti.DG	0.259363	0.002781	516730
Uzbekistan_BA_Bustan	Kazakhstan_MLBA_Alakul_Maitan	Mbuti.DG	0.258331	0.002597	729640
Uzbekistan_BA_Bustan	Russia_MLBA_Krasnoyarsk_o	Mbuti.DG	0.251239	0.00281	564290
Uzbekistan_BA_Bustan	Russia_MLBA_Sintashta	Mbuti.DG	0.258515	0.002556	772557
Uzbekistan_BA_Bustan	Russia_MLBA_Sintashta_o1	Mbuti.DG	0.257264	0.002862	290568
Uzbekistan_BA_Bustan	Russia_MLBA_Sintashta_o2	Mbuti.DG	0.25988	0.002627	641847
Uzbekistan_BA_Bustan	Russia_MLBA_Sintashta_o3	Mbuti.DG	0.257179	0.002951	445381
Uzbekistan_BA_Bustan	Russia_North_Caucasus	Mbuti.DG	0.262473	0.002677	593511
Uzbekistan_BA_Bustan	Russia_North_Caucasus_MBA	Mbuti.DG	0.263426	0.002693	656739
Uzbekistan_BA_Bustan	Kazakhstan_MLBA_Alakul_Maitan_o	Mbuti.DG	0.258731	0.002662	641864
Uzbekistan_BA_Bustan	Kazakhstan_MLBA_Alakul_Satan	Mbuti.DG	0.257837	0.002844	579808
Uzbekistan_BA_Bustan	Kazakhstan_MLBA_Bylkyldak	Mbuti.DG	0.256327	0.002869	560337
Uzbekistan_BA_Bustan	Kazakhstan_MLBA_Kairan	Mbuti.DG	0.258629	0.002662	662581
Uzbekistan_BA_Bustan	Kazakhstan_MLBA_Kairan_o	Mbuti.DG	0.25516	0.002827	328461
Uzbekistan_BA_Bustan	Kazakhstan_MLBA_Kairan_published	Mbuti.DG	0.256312	0.003267	131131
Uzbekistan_BA_Bustan	Kazakhstan_MLBA_Karagash	Mbuti.DG	0.260162	0.002713	557644
Uzbekistan_BA_Bustan	Russia_MLBA_Sintashta_published	Mbuti.DG	0.255815	0.003181	194749
Uzbekistan_BA_Bustan	Kazakhstan_MLBA_OyDzhaylau	Mbuti.DG	0.258114	0.002629	677270
Uzbekistan_BA_Bustan	Kazakhstan_MLBA_OyDzhaylau_o	Mbuti.DG	0.260738	0.003235	167917
Uzbekistan_BA_Bustan	Kazakhstan_MLBA_Solyanka	Mbuti.DG	0.25956	0.003029	268743
Uzbekistan_BA_Bustan	Kazakhstan_MLBA1_AkMoustafa	Mbuti.DG	0.258562	0.002798	513381
Uzbekistan_BA_Bustan	Russia_Steppe_Lola	Mbuti.DG	0.2604	0.002877	535972
Uzbekistan_BA_Bustan	Russia_Sintashta_MLBA.SG	Mbuti.DG	0.252822	0.002628	635487
Uzbekistan_BA_Bustan	Scotland_LBA	Mbuti.DG	0.259563	0.002617	667028
Uzbekistan_BA_Bustan	Scotland_LBA_published	Mbuti.DG	0.263742	0.007772	10924
Uzbekistan_BA_Bustan	Scotland_MBA	Mbuti.DG	0.257275	0.002623	652090
Uzbekistan_BA_Bustan	Sweden_BA.SG	Mbuti.DG	0.25609	0.003527	109623
Uzbekistan_BA_Bustan	Russia_Mezhovskaya.SG	Mbuti.DG	0.252111	0.002707	650211
Uzbekistan_BA_Bustan	Russia_MLBA_Potapovka	Mbuti.DG	0.257765	0.00293	332452
Uzbekistan_BA_Bustan	Russia_MLBA_Priobrazhenka	Mbuti.DG	0.261086	0.006111	20322
Uzbekistan_BA_Bustan	Russia_Petrovka	Mbuti.DG	0.257585	0.002916	211747
Uzbekistan_BA_Bustan	Russia_Poltavka	Mbuti.DG	0.262365	0.002686	719332
Uzbekistan_BA_Bustan	Russia_Poltavka_o	Mbuti.DG	0.256784	0.002904	409771
Uzbekistan_BA_Bustan	Russia_Poltavka_published	Mbuti.DG	0.259233	0.003023	394791
Uzbekistan_BA_Bustan	Russia_Potapovka	Mbuti.DG	0.258274	0.002863	414750
Uzbekistan_BA_Bustan	Russia_Potapovka_o	Mbuti.DG	0.260468	0.002846	587264
Uzbekistan_BA_Bustan	Russia_Srubnaya	Mbuti.DG	0.259094	0.002587	745013
Uzbekistan_BA_Bustan	Russia_Srubnaya_Alakul.SG	Mbuti.DG	0.257062	0.002603	750257
Uzbekistan_BA_Bustan	Russia_Srubnaya_o	Mbuti.DG	0.2624	0.003006	337143
Uzbekistan_BA_Bustan	Ukraine_LateSrubnaya.SG	Mbuti.DG	0.255654	0.004027	67950
Uzbekistan_BA_Bustan	Turkmenistan_LBA_Parkhai	Mbuti.DG	0.264568	0.002898	550048
Uzbekistan_BA_Bustan	Turkmenistan_LBA_Parkhai_o	Mbuti.DG	0.264558	0.002838	544277
Uzbekistan_BA_Bustan	Turkmenistan_LBA_Sumbar	Mbuti.DG	0.265923	0.002926	433791
Uzbekistan_BA_Bustan	Turkmenistan_Parkhai_MBA	Mbuti.DG	0.268475	0.002874	531812
Uzbekistan_BA_Bustan	Wales_MBA	Mbuti.DG	0.240607	0.006682	18177
Uzbekistan_BA_Bustan	Anatolia_Boncuklu_N.SG	Mbuti.DG	0.250127	0.002707	662605
Uzbekistan_BA_Bustan	Anatolia_Kumtepe_N.SG	Mbuti.DG	0.249106	0.003924	76380
Uzbekistan_BA_Bustan	Anatolia_N	Mbuti.DG	0.255409	0.002557	772553
Uzbekistan_BA_Bustan	Anatolia_N.SG	Mbuti.DG	0.251536	0.00265	707325
Uzbekistan_BA_Bustan	Anatolia_N_published	Mbuti.DG	0.255514	0.002603	722763
Uzbekistan_BA_Bustan	Anatolia_TepecikCiftlik_N.SG	Mbuti.DG	0.252503	0.00271	512049
Uzbekistan_BA_Bustan	Anatolia_TepecikCiftlik_N_o.SG	Mbuti.DG	0.251861	0.008484	9757
Uzbekistan_BA_Bustan	Austria_EN_LBK	Mbuti.DG	0.256711	0.002577	735246
Uzbekistan_BA_Bustan	Bulgaria_Dzhulyunitsa_N	Mbuti.DG	0.25305	0.003225	171884
Uzbekistan_BA_Bustan	Bulgaria_Krepost_N	Mbuti.DG	0.25754	0.003239	167785
Uzbekistan_BA_Bustan	Bulgaria_MalakPreslavets_N	Mbuti.DG	0.257149	0.002708	431744
Uzbekistan_BA_Bustan	Bulgaria_MalakPreslavets_N_published	Mbuti.DG	0.252337	0.003317	128131
Uzbekistan_BA_Bustan	Bulgaria_N	Mbuti.DG	0.253893	0.002811	536127
Uzbekistan_BA_Bustan	Bulgaria_N_published	Mbuti.DG	0.255568	0.002609	573733
Uzbekistan_BA_Bustan	Croatia_EN_Impressa	Mbuti.DG	0.255785	0.002743	528621
Uzbekistan_BA_Bustan	Croatia_EN_Starcevo	Mbuti.DG	0.25768	0.005063	40547
Uzbekistan_BA_Bustan	Croatia_LN_Starcevo	Mbuti.DG	0.255181	0.002759	544459
Uzbekistan_BA_Bustan	Croatia_MN_Sopot	Mbuti.DG	0.2561	0.002611	665413
Uzbekistan_BA_Bustan	Croatia_N_Cardial	Mbuti.DG	0.254809	0.002651	640701
Uzbekistan_BA_Bustan	Croatia_Vucedol	Mbuti.DG	0.260952	0.003463	126690
Uzbekistan_BA_Bustan	Czech_Baalberge	Mbuti.DG	0.255373	0.002821	572345
Uzbekistan_BA_Bustan	Czech_CordedWare	Mbuti.DG	0.259667	0.0026	724814
Uzbekistan_BA_Bustan	Czech_Eneolithic	Mbuti.DG	0.256613	0.002921	517993
Uzbekistan_BA_Bustan	Czech_Megalithic.SG	Mbuti.DG	0.251168	0.002816	503579
Uzbekistan_BA_Bustan	Czech_MN	Mbuti.DG	0.25686	0.002881	497475
Uzbekistan_BA_Bustan	Czech_N	Mbuti.DG	0.256357	0.002723	627600
Uzbekistan_BA_Bustan	Denmark_LN.SG	Mbuti.DG	0.252175	0.003243	141667
Uzbekistan_BA_Bustan	Denmark_MN_B.SG	Mbuti.DG	0.250124	0.003171	182733
Uzbekistan_BA_Bustan	DevilsCave_N.SG	Mbuti.DG	0.226284	0.002625	714596
Uzbekistan_BA_Bustan	England_N	Mbuti.DG	0.255578	0.002583	745095
Uzbekistan_BA_Bustan	England_N.SG	Mbuti.DG	0.254289	0.00259	758570
Uzbekistan_BA_Bustan	England_N_all.SG	Mbuti.DG	0.253103	0.002612	746232
Uzbekistan_BA_Bustan	England_N_possible	Mbuti.DG	0.255553	0.002846	451288
Uzbekistan_BA_Bustan	England_N_published	Mbuti.DG	0.256713	0.004488	51846
Uzbekistan_BA_Bustan	Estonia_CordedWare.SG	Mbuti.DG	0.255329	0.002598	702867
Uzbekistan_BA_Bustan	Estonia_CWC	Mbuti.DG	0.251504	0.002857	560840
Uzbekistan_BA_Bustan	Estonia_EMN_Narva	Mbuti.DG	0.251448	0.002832	417049
Uzbekistan_BA_Bustan	Estonia_MN_CCC	Mbuti.DG	0.257792	0.003121	196263
Uzbekistan_BA_Bustan	Estonia_N_CombCeramic.SG	Mbuti.DG	0.248758	0.003501	99047
Uzbekistan_BA_Bustan	France_BerryAuBac	Mbuti.DG	0.248735	0.004629	39385
Uzbekistan_BA_Bustan	France_MN	Mbuti.DG	0.255927	0.00272	654057
Uzbekistan_BA_Bustan	Germany_CordedWare	Mbuti.DG	0.261355	0.002665	718043
Uzbekistan_BA_Bustan	Germany_CordedWare.SG	Mbuti.DG	0.252562	0.003007	219849
Uzbekistan_BA_Bustan	Germany_CordedWare_o	Mbuti.DG	0.257434	0.003061	193845
Uzbekistan_BA_Bustan	Germany_CordedWare_Tauber	Mbuti.DG	0.259038	0.003712	69456
Uzbekistan_BA_Bustan	Germany_EN_LBK	Mbuti.DG	0.255574	0.002629	733106
Uzbekistan_BA_Bustan	Germany_EN_LBK_published	Mbuti.DG	0.255761	0.002561	731813
Uzbekistan_BA_Bustan	Germany_EN_LBK_Stuttgart_published.DG	Mbuti.DG	0.25052	0.002778	696216
Uzbekistan_BA_Bustan	Germany_LN_Alberstedt	Mbuti.DG	0.257436	0.002828	661028
Uzbekistan_BA_Bustan	Germany_LN_BenzigerodeHeimburg	Mbuti.DG	0.258726	0.002809	506061
Uzbekistan_BA_Bustan	Germany_LN_Karsdorf	Mbuti.DG	0.255822	0.003559	106245
Uzbekistan_BA_Bustan	Germany_MN_Baalberge	Mbuti.DG	0.255645	0.002822	350027
Uzbekistan_BA_Bustan	Germany_MN_Blatterhohle	Mbuti.DG	0.253304	0.002681	673147
Uzbekistan_BA_Bustan	Germany_MN_Esperstedt	Mbuti.DG	0.2543	0.002796	614828
Uzbekistan_BA_Bustan	Germany_MN_Salzmuende	Mbuti.DG	0.252707	0.003677	93912
Uzbekistan_BA_Bustan	Germany_N_published	Mbuti.DG	0.253835	0.003651	82496
Uzbekistan_BA_Bustan	Gibraltar_N	Mbuti.DG	0.25706	0.003098	258345
Uzbekistan_BA_Bustan	Greece_LN.SG	Mbuti.DG	0.251934	0.002725	680242
Uzbekistan_BA_Bustan	Greece_N	Mbuti.DG	0.254168	0.002929	516871
Uzbekistan_BA_Bustan	Greece_N.SG	Mbuti.DG	0.250833	0.00301	430090
Uzbekistan_BA_Bustan	Greece_Peloponnese_N	Mbuti.DG	0.258111	0.002644	710266
Uzbekistan_BA_Bustan	Greece_Peloponnese_N_all	Mbuti.DG	0.25746	0.002826	509385
Uzbekistan_BA_Bustan	Hungary_EN_HG_Koros	Mbuti.DG	0.251216	0.002733	572579
Uzbekistan_BA_Bustan	Hungary_EN_Koros	Mbuti.DG	0.255134	0.002691	663936
Uzbekistan_BA_Bustan	Hungary_EN_Koros_all	Mbuti.DG	0.257445	0.003136	209933
Uzbekistan_BA_Bustan	Hungary_EN_Starcevo	Mbuti.DG	0.254241	0.00272	583857
Uzbekistan_BA_Bustan	Hungary_EN_Starcevo_all	Mbuti.DG	0.25523	0.002824	505200
Uzbekistan_BA_Bustan	Hungary_EN_Starcevo_o_published	Mbuti.DG	0.254469	0.002902	475044
Uzbekistan_BA_Bustan	Hungary_LBK_MN.SG	Mbuti.DG	0.249912	0.002893	692310
Uzbekistan_BA_Bustan	Hungary_LN_Lengyel	Mbuti.DG	0.256307	0.002624	642925
Uzbekistan_BA_Bustan	Hungary_LN_Lengyel_published	Mbuti.DG	0.25648	0.002826	324133
Uzbekistan_BA_Bustan	Hungary_LN_Sopot	Mbuti.DG	0.257636	0.002708	471170
Uzbekistan_BA_Bustan	Hungary_LN_Tisza	Mbuti.DG	0.253942	0.002705	637165
Uzbekistan_BA_Bustan	Hungary_LN_Tisza_published	Mbuti.DG	0.255346	0.00468	43404
Uzbekistan_BA_Bustan	Hungary_MBA_Vatya.SG	Mbuti.DG	0.25316	0.002697	598348
Uzbekistan_BA_Bustan	Hungary_MN	Mbuti.DG	0.253247	0.00276	523594
Uzbekistan_BA_Bustan	Hungary_MN_ALBK_Szakalhat	Mbuti.DG	0.256763	0.0028	358508
Uzbekistan_BA_Bustan	Hungary_MN_ALPc	Mbuti.DG	0.255284	0.002655	668795
Uzbekistan_BA_Bustan	Hungary_MN_ALPc_Bukk	Mbuti.DG	0.252255	0.002888	555398
Uzbekistan_BA_Bustan	Hungary_MN_ALPc_Esztar	Mbuti.DG	0.258521	0.003782	72902
Uzbekistan_BA_Bustan	Hungary_MN_ALPc_I	Mbuti.DG	0.25376	0.003172	199233
Uzbekistan_BA_Bustan	Hungary_MN_ALPc_III	Mbuti.DG	0.258483	0.003061	210231
Uzbekistan_BA_Bustan	Hungary_MN_ALPc_III_published	Mbuti.DG	0.254002	0.002929	461121
Uzbekistan_BA_Bustan	Hungary_MN_ALPc_Szakalhat	Mbuti.DG	0.25675	0.002842	378297
Uzbekistan_BA_Bustan	Hungary_MN_ALPc_Szatmar	Mbuti.DG	0.256106	0.002814	537878
Uzbekistan_BA_Bustan	Hungary_MN_ALPc_Tiszadob	Mbuti.DG	0.255976	0.002654	622414
Uzbekistan_BA_Bustan	Hungary_MN_LBK	Mbuti.DG	0.253459	0.002651	658492
Uzbekistan_BA_Bustan	Hungary_MN_LBK_published	Mbuti.DG	0.256549	0.002898	496502
Uzbekistan_BA_Bustan	Hungary_MN_Vinca	Mbuti.DG	0.257213	0.002706	477245
Uzbekistan_BA_Bustan	Hungary_MN_Vinca_published	Mbuti.DG	0.254797	0.002812	451623
Uzbekistan_BA_Bustan	Iberia_EN	Mbuti.DG	0.252996	0.002608	681497
Uzbekistan_BA_Bustan	Iberia_EN.SG	Mbuti.DG	0.252191	0.002642	692322
Uzbekistan_BA_Bustan	Iberia_EN_Cardial	Mbuti.DG	0.253875	0.0028	433278
Uzbekistan_BA_Bustan	Iberia_EN_Epicardial	Mbuti.DG	0.254626	0.002936	289716
Uzbekistan_BA_Bustan	Iberia_LN	Mbuti.DG	0.255036	0.002612	705692
Uzbekistan_BA_Bustan	Iberia_LN.SG	Mbuti.DG	0.249204	0.003041	219639
Uzbekistan_BA_Bustan	Iberia_LN_C	Mbuti.DG	0.254478	0.0026	710672
Uzbekistan_BA_Bustan	Iberia_LN_C.SG	Mbuti.DG	0.25085	0.002612	729525
Uzbekistan_BA_Bustan	Iberia_MN	Mbuti.DG	0.255392	0.002589	730992
Uzbekistan_BA_Bustan	Iberia_MN.SG	Mbuti.DG	0.251079	0.00267	715444
Uzbekistan_BA_Bustan	Iberia_MN_BA.SG	Mbuti.DG	0.252016	0.002647	717136
Uzbekistan_BA_Bustan	Iberia_MN_Cadiz	Mbuti.DG	0.254217	0.002931	460237
Uzbekistan_BA_Bustan	Iberia_MN_published	Mbuti.DG	0.254384	0.002812	426261
Uzbekistan_BA_Bustan	Iberia_N_C	Mbuti.DG	0.253694	0.002715	639545
Uzbekistan_BA_Bustan	Iberia_N_EBA	Mbuti.DG	0.250861	0.003027	268252
Uzbekistan_BA_Bustan	Iran_GanjDareh_N	Mbuti.DG	0.264722	0.002694	695710
Uzbekistan_BA_Bustan	Iran_LN_SehGabi	Mbuti.DG	0.260287	0.002952	347816
Uzbekistan_BA_Bustan	Iran_TepeAbdulHosein_N.SG	Mbuti.DG	0.259783	0.002707	659561
Uzbekistan_BA_Bustan	Iran_Wezmeh_N.SG	Mbuti.DG	0.255878	0.002772	688918
Uzbekistan_BA_Bustan	Ireland_Megalithic.SG	Mbuti.DG	0.251732	0.002613	735384
Uzbekistan_BA_Bustan	Ireland_MN.SG	Mbuti.DG	0.249301	0.002834	692820
Uzbekistan_BA_Bustan	Israel_Middle_Late_PPNB	Mbuti.DG	0.244612	0.00402	70715
Uzbekistan_BA_Bustan	Israel_PPNB	Mbuti.DG	0.245925	0.002811	502156
Uzbekistan_BA_Bustan	Italy_N.SG	Mbuti.DG	0.254872	0.002596	741421
Uzbekistan_BA_Bustan	Italy_N_oWHG.SG	Mbuti.DG	0.254851	0.003054	318324
Uzbekistan_BA_Bustan	Jordan_Late_PPNB	Mbuti.DG	0.244032	0.002954	305471
Uzbekistan_BA_Bustan	Jordan_PPNB	Mbuti.DG	0.246844	0.002839	262771
Uzbekistan_BA_Bustan	Jordan_PPNB_published	Mbuti.DG	0.246273	0.003287	120011
Uzbekistan_BA_Bustan	Jordan_PPNC	Mbuti.DG	0.246126	0.003023	200337
Uzbekistan_BA_Bustan	Jordan_PPNC_published	Mbuti.DG	0.250579	0.005002	31908
Uzbekistan_BA_Bustan	Latvia_LN_CordedWare	Mbuti.DG	0.263091	0.00305	181548
Uzbekistan_BA_Bustan	Latvia_MN	Mbuti.DG	0.255198	0.002634	668881
Uzbekistan_BA_Bustan	Latvia_MN_Comb_Ware.SG	Mbuti.DG	0.250163	0.002916	453521
Uzbekistan_BA_Bustan	Lithuania_EMN_Narva	Mbuti.DG	0.25199	0.002675	716181
Uzbekistan_BA_Bustan	Lithuania_LN	Mbuti.DG	0.257248	0.002651	716546
Uzbekistan_BA_Bustan	Macedonia_N	Mbuti.DG	0.254183	0.002845	560066
Uzbekistan_BA_Bustan	Mentesh	Mbuti.DG	0.253877	0.002963	199760
Uzbekistan_BA_Bustan	Norway_N_HG.SG	Mbuti.DG	0.251254	0.002878	504275
Uzbekistan_BA_Bustan	Poland_BKG.SG	Mbuti.DG	0.250935	0.002572	741982
Uzbekistan_BA_Bustan	Poland_BKG_o1.SG	Mbuti.DG	0.247269	0.002921	367016
Uzbekistan_BA_Bustan	Poland_BKG_o2.SG	Mbuti.DG	0.251048	0.002775	583757
Uzbekistan_BA_Bustan	Poland_ChopiceVeseleCulture	Mbuti.DG	0.258619	0.002637	581235
Uzbekistan_BA_Bustan	Poland_CordedWare.SG	Mbuti.DG	0.251846	0.007909	11457
Uzbekistan_BA_Bustan	Poland_CordedWare_ProtoUnetice.SG	Mbuti.DG	0.248896	0.003839	76753
Uzbekistan_BA_Bustan	Poland_CWC	Mbuti.DG	0.258438	0.002852	475285
Uzbekistan_BA_Bustan	Poland_CWC.SG	Mbuti.DG	0.255746	0.002686	698563
Uzbekistan_BA_Bustan	Poland_GAC.SG	Mbuti.DG	0.24936	0.002755	617828
Uzbekistan_BA_Bustan	Poland_Globular_Amphora	Mbuti.DG	0.255424	0.002716	526589
Uzbekistan_BA_Bustan	Poland_Globular_Amphora_published	Mbuti.DG	0.254634	0.004043	64061
Uzbekistan_BA_Bustan	Poland_Koszyce_GAC.SG	Mbuti.DG	0.251689	0.00257	744579
Uzbekistan_BA_Bustan	Poland_Ksiaznice_GAC.SG	Mbuti.DG	0.252676	0.002634	621342
Uzbekistan_BA_Bustan	Poland_Mierzanowice_GAC.SG	Mbuti.DG	0.249528	0.003116	230035
Uzbekistan_BA_Bustan	Poland_Sandomierz_GAC.SG	Mbuti.DG	0.248668	0.002783	506389
Uzbekistan_BA_Bustan	Poland_TRB.SG	Mbuti.DG	0.251123	0.00261	706098
Uzbekistan_BA_Bustan	Romania_EN	Mbuti.DG	0.255285	0.002674	586323
Uzbekistan_BA_Bustan	Russia_Caucasus_Eneolithic	Mbuti.DG	0.26225	0.002945	468658
Uzbekistan_BA_Bustan	Russia_Khvalynsk_Eneolithic	Mbuti.DG	0.256235	0.002823	499790
Uzbekistan_BA_Bustan	Russia_Lokomotiv_Eneolithic.SG	Mbuti.DG	0.227441	0.002666	620851
Uzbekistan_BA_Bustan	Russia_Shamanka_Eneolithic.SG	Mbuti.DG	0.228495	0.002562	750164
Uzbekistan_BA_Bustan	Russia_Steppe_Eneolithic	Mbuti.DG	0.264651	0.002698	672056
Uzbekistan_BA_Bustan	Russia_UstBelaya_Angara	Mbuti.DG	0.236366	0.002622	717438
Uzbekistan_BA_Bustan	Russia_UstBelaya_Angara_published	Mbuti.DG	0.23309	0.002715	562291
Uzbekistan_BA_Bustan	Russia_UstIda_LN.SG	Mbuti.DG	0.23148	0.002658	644042
Uzbekistan_BA_Bustan	Scotland_Megalithic.SG	Mbuti.DG	0.249068	0.003013	225883
Uzbekistan_BA_Bustan	Scotland_Mesolithic_all.SG	Mbuti.DG	0.236912	0.006523	16662
Uzbekistan_BA_Bustan	Scotland_N	Mbuti.DG	0.256324	0.00258	781468
Uzbekistan_BA_Bustan	Scotland_N.SG	Mbuti.DG	0.254838	0.00269	621686
Uzbekistan_BA_Bustan	Scotland_N_all.SG	Mbuti.DG	0.253343	0.002954	458079
Uzbekistan_BA_Bustan	Scotland_N_o	Mbuti.DG	0.256733	0.003581	102015
Uzbekistan_BA_Bustan	Scotland_N_published	Mbuti.DG	0.256833	0.003534	96099
Uzbekistan_BA_Bustan	Serbia_EN	Mbuti.DG	0.255127	0.002625	667038
Uzbekistan_BA_Bustan	Serbia_EN_published	Mbuti.DG	0.253041	0.004413	42518
Uzbekistan_BA_Bustan	Serbia_EN_Starcevo	Mbuti.DG	0.257517	0.002857	546928
Uzbekistan_BA_Bustan	Serbia_N	Mbuti.DG	0.256806	0.003503	137696
Uzbekistan_BA_Bustan	Sweden_LN.SG	Mbuti.DG	0.253671	0.002709	680840
Uzbekistan_BA_Bustan	Sweden_LNBA	Mbuti.DG	0.258831	0.002789	472211
Uzbekistan_BA_Bustan	Sweden_Megalithic	Mbuti.DG	0.25241	0.002677	530422
Uzbekistan_BA_Bustan	Sweden_Megalithic.SG	Mbuti.DG	0.251843	0.002676	728518
Uzbekistan_BA_Bustan	Sweden_PWC	Mbuti.DG	0.254686	0.003115	251826
Uzbekistan_BA_Bustan	Sweden_PWC_NHG.SG	Mbuti.DG	0.249765	0.002763	645544
Uzbekistan_BA_Bustan	Sweden_TRB_MN	Mbuti.DG	0.254438	0.003021	266006
Uzbekistan_BA_Bustan	Sweden_TRB_MN.SG	Mbuti.DG	0.250475	0.00276	491878
Uzbekistan_BA_Bustan	Ukraine_Eneolithic	Mbuti.DG	0.257565	0.002949	281290
Uzbekistan_BA_Bustan	Ukraine_Eneolithic_SredniStog	Mbuti.DG	0.256009	0.002854	405028
Uzbekistan_BA_Bustan	Ukraine_Eneolithic_SredniStog_o4	Mbuti.DG	0.261355	0.002885	492188
Uzbekistan_BA_Bustan	Ukraine_Eneolithic_Trypillia	Mbuti.DG	0.256284	0.003519	113713
Uzbekistan_BA_Bustan	Ukraine_Eneolithic_Trypillia_published	Mbuti.DG	0.254335	0.003155	166194
Uzbekistan_BA_Bustan	Ukraine_Eneolithic_Trypillian_published	Mbuti.DG	0.252923	0.004577	43219
Uzbekistan_BA_Bustan	Ukraine_Globular_Amphora	Mbuti.DG	0.254192	0.002661	653530
Uzbekistan_BA_Bustan	Ukraine_N	Mbuti.DG	0.255431	0.002607	707147
Uzbekistan_BA_Bustan	Ukraine_N_o2_published	Mbuti.DG	0.251556	0.003432	131430
Uzbekistan_BA_Bustan	Ukraine_N_published	Mbuti.DG	0.253306	0.002797	329521
Uzbekistan_BA_Bustan	Russia_Steppe_Catacomb	Mbuti.DG	0.260314	0.002679	592363
Uzbekistan_BA_Bustan	UstBelaya_N.SG	Mbuti.DG	0.22622	0.002883	319813
Uzbekistan_BA_Bustan	Uzbekistan_Bustan_Eneolithic	Mbuti.DG	0.267338	0.00294	432967
Uzbekistan_BA_Bustan	Uzbekistan_ZamanBaba_N	Mbuti.DG	0.27383	0.008604	10106
Uzbekistan_BA_Bustan	Wales_LN	Mbuti.DG	0.254372	0.003254	168174
Uzbekistan_BA_Bustan	Wales_LN.SG	Mbuti.DG	0.254879	0.003183	190782
Uzbekistan_BA_Bustan	Wales_N	Mbuti.DG	0.255681	0.003282	142436
Uzbekistan_BA_Bustan	Wales_N_all.SG	Mbuti.DG	0.25584	0.003794	75999
Uzbekistan_BA_Bustan	Anatolia_Epipaleolithic	Mbuti.DG	0.248939	0.002879	550138
Uzbekistan_BA_Bustan	Austria_KremsWA3	Mbuti.DG	0.23618	0.003259	151656
Uzbekistan_BA_Bustan	Belgium_UP_GoyetQ116_1_published_all	Mbuti.DG	0.23522	0.002832	520151
Uzbekistan_BA_Bustan	Belgium_UP_GoyetQ-2_published	Mbuti.DG	0.23641	0.004679	45722
Uzbekistan_BA_Bustan	Belgium_UP_GoyetQ376-19_published	Mbuti.DG	0.240892	0.006593	16431
Uzbekistan_BA_Bustan	Belgium_UP_Magdalenian	Mbuti.DG	0.235105	0.00322	155944
Uzbekistan_BA_Bustan	Czech_Pavlov1	Mbuti.DG	0.237631	0.004955	36909
Uzbekistan_BA_Bustan	Czech_Vestonice13	Mbuti.DG	0.23702	0.003816	78389
Uzbekistan_BA_Bustan	Czech_Vestonice15	Mbuti.DG	0.233729	0.00594	20046
Uzbekistan_BA_Bustan	Czech_Vestonice16	Mbuti.DG	0.236441	0.002804	492817
Uzbekistan_BA_Bustan	Czech_Vestonice43	Mbuti.DG	0.231667	0.003675	87826
Uzbekistan_BA_Bustan	France_Chaudardes_published	Mbuti.DG	0.251296	0.004022	59301
Uzbekistan_BA_Bustan	France_Iboussieres25_1	Mbuti.DG	0.243834	0.004255	51730
Uzbekistan_BA_Bustan	France_Iboussieres31_2	Mbuti.DG	0.240363	0.004155	53280
Uzbekistan_BA_Bustan	France_Ranchot88_published	Mbuti.DG	0.246775	0.003011	273361
Uzbekistan_BA_Bustan	France_Rigney1_published	Mbuti.DG	0.246622	0.00581	22912
Uzbekistan_BA_Bustan	France_Rochedane_published	Mbuti.DG	0.248336	0.003244	151825
Uzbekistan_BA_Bustan	Georgia_Kotias.SG	Mbuti.DG	0.261611	0.002894	689329
Uzbekistan_BA_Bustan	Georgia_Satsurblia.SG	Mbuti.DG	0.25831	0.002981	477621
Uzbekistan_BA_Bustan	Germany_Bockstein_published	Mbuti.DG	0.229132	0.00663	14005
Uzbekistan_BA_Bustan	Germany_Burkhardtshohle_published	Mbuti.DG	0.238941	0.005389	25283
Uzbekistan_BA_Bustan	Germany_Falkenstein	Mbuti.DG	0.241845	0.003298	123911
Uzbekistan_BA_Bustan	Germany_HohleFels49_published	Mbuti.DG	0.215571	0.004634	38907
Uzbekistan_BA_Bustan	Iberia_ElMiron	Mbuti.DG	0.240099	0.002891	426725
Uzbekistan_BA_Bustan	Iberia_HG	Mbuti.DG	0.246582	0.002896	599674
Uzbekistan_BA_Bustan	Iberia_HG.SG	Mbuti.DG	0.242885	0.00264	673997
Uzbekistan_BA_Bustan	Iberia_HG_published	Mbuti.DG	0.243898	0.002961	315738
Uzbekistan_BA_Bustan	Iberia_HG_published.SG	Mbuti.DG	0.244762	0.002851	654234
Uzbekistan_BA_Bustan	Iberia_UP_Azilian	Mbuti.DG	0.243214	0.003108	236716
Uzbekistan_BA_Bustan	Italy_North_Villabruna_HG	Mbuti.DG	0.246031	0.002823	587331
Uzbekistan_BA_Bustan	Italy_Sicily_HG_OrienteC_published	Mbuti.DG	0.244914	0.004537	42699
Uzbekistan_BA_Bustan	Italy_South_HG_Ostuni1	Mbuti.DG	0.234269	0.002965	216607
Uzbekistan_BA_Bustan	Italy_South_HG_Ostuni2	Mbuti.DG	0.23578	0.007457	11121
Uzbekistan_BA_Bustan	Italy_South_HG_Paglicci133_published	Mbuti.DG	0.232445	0.004276	50478
Uzbekistan_BA_Bustan	Latvia_HG	Mbuti.DG	0.251912	0.002589	737024
Uzbekistan_BA_Bustan	Latvia_HG.SG	Mbuti.DG	0.247719	0.00281	666011
Uzbekistan_BA_Bustan	Luxembourg_Loschbour_published.DG	Mbuti.DG	0.246696	0.002795	699007
Uzbekistan_BA_Bustan	Romania_Muierii2	Mbuti.DG	0.231137	0.004012	55082
Uzbekistan_BA_Bustan	Romania_Oase1	Mbuti.DG	0.201938	0.00336	133066
Uzbekistan_BA_Bustan	Russia_AfontovaGora2.SG	Mbuti.DG	0.254047	0.004185	56071
Uzbekistan_BA_Bustan	Russia_AfontovaGora3	Mbuti.DG	0.250373	0.003205	180665
Uzbekistan_BA_Bustan	Russia_EHG	Mbuti.DG	0.25245	0.002937	364498
Uzbekistan_BA_Bustan	Russia_HG	Mbuti.DG	0.252624	0.004425	46389
Uzbekistan_BA_Bustan	Russia_HG_Karelia	Mbuti.DG	0.254422	0.002789	644144
Uzbekistan_BA_Bustan	Russia_HG_Sosnoviy	Mbuti.DG	0.255026	0.002942	433900
Uzbekistan_BA_Bustan	Russia_HG_Tyumen	Mbuti.DG	0.255745	0.002802	550754
Uzbekistan_BA_Bustan	Russia_Kostenki12	Mbuti.DG	0.233365	0.004906	37814
Uzbekistan_BA_Bustan	Russia_Kostenki14	Mbuti.DG	0.233779	0.002816	662428
Uzbekistan_BA_Bustan	Russia_MA1_HG.SG	Mbuti.DG	0.24842	0.002914	494190
Uzbekistan_BA_Bustan	Russia_Popovo_HG	Mbuti.DG	0.252979	0.004475	45098
Uzbekistan_BA_Bustan	Russia_Sidelkino_HG.SG	Mbuti.DG	0.250578	0.002863	579533
Uzbekistan_BA_Bustan	Russia_Sunghir1.SG	Mbuti.DG	0.234077	0.002907	482310
Uzbekistan_BA_Bustan	Russia_Sunghir2.SG	Mbuti.DG	0.235337	0.002811	684291
Uzbekistan_BA_Bustan	Russia_Sunghir3.SG	Mbuti.DG	0.233752	0.002751	691489
Uzbekistan_BA_Bustan	Russia_Sunghir4.SG	Mbuti.DG	0.23203	0.002809	682494
Uzbekistan_BA_Bustan	Russia_Sunghir6.SG	Mbuti.DG	0.253243	0.002739	684552
Uzbekistan_BA_Bustan	Russia_Ust_Ishim_HG_published.DG	Mbuti.DG	0.213876	0.002792	707753
Uzbekistan_BA_Bustan	Sweden_Motala_HG	Mbuti.DG	0.252222	0.004878	37942
Uzbekistan_BA_Bustan	Switzerland_Bichon.SG	Mbuti.DG	0.245082	0.002812	691647
Uzbekistan_BA_Bustan	Russia_HG_Samara	Mbuti.DG	0.252996	0.003041	310817
Uzbekistan_BA_Bustan	Yana_UP.SG	Mbuti.DG	0.231744	0.00264	709917
Uzbekistan_BA_Bustan	Anatolia_Alalakh_MLBA	Mbuti.DG	0.258547	0.002546	772609
Uzbekistan_BA_Bustan	Anatolia_Alalakh_MLBA_outlier	Mbuti.DG	0.263727	0.0029	502171
Uzbekistan_BA_Bustan	Caucasus_lowlands_LC	Mbuti.DG	0.25816	0.003235	151963
Uzbekistan_BA_Bustan	Anatolia_Arslantepe_EBA	Mbuti.DG	0.258346	0.0026	698095
Uzbekistan_BA_Bustan	Anatolia_Arslantepe_LC	Mbuti.DG	0.259664	0.002558	761581
Uzbekistan_BA_Bustan	Anatolia_CamlibelTarlasi_LC	Mbuti.DG	0.257289	0.002629	717601
Uzbekistan_BA_Bustan	Anatolia_Buyukkaya_EC	Mbuti.DG	0.2544	0.002963	410557
Uzbekistan_BA_Bustan	Syria_Ebla_EMBA	Mbuti.DG	0.256028	0.002606	692677
Uzbekistan_BA_Bustan	Anatolia_Ikiztepe_LC	Mbuti.DG	0.258976	0.002695	414409
Uzbekistan_BA_Bustan	Anatolia_TellKurdu_EC	Mbuti.DG	0.255412	0.002763	444276
Uzbekistan_BA_Bustan	Anatolia_TellKurdu_EMC	Mbuti.DG	0.25225	0.003246	123649
Uzbekistan_BA_Bustan	Caucasus_lowlands_LN	Mbuti.DG	0.258074	0.002687	517600
Uzbekistan_BA_Bustan	Anatolia_TitrisHoyuk_EBA	Mbuti.DG	0.255776	0.003916	71334
Uzbekistan_BA_Bustan	GBR.SG	Mbuti.DG	0.256526	0.002568	816930
Uzbekistan_BA_Bustan	FIN.SG	Mbuti.DG	0.255113	0.002569	817046
Uzbekistan_BA_Bustan	CHS.SG	Mbuti.DG	0.227029	0.002551	796678
Uzbekistan_BA_Bustan	CDX.SG	Mbuti.DG	0.225961	0.002544	796555
Uzbekistan_BA_Bustan	IBS.SG	Mbuti.DG	0.251858	0.002547	826189
Uzbekistan_BA_Bustan	PJL.SG	Mbuti.DG	0.248209	0.002525	822661
Uzbekistan_BA_Bustan	KHV.SG	Mbuti.DG	0.226636	0.002553	800831
Uzbekistan_BA_Bustan	BEB.SG	Mbuti.DG	0.242065	0.002509	821043
Uzbekistan_BA_Bustan	ITU.SG	Mbuti.DG	0.244714	0.002521	819866
Uzbekistan_BA_Bustan	CHB.SG	Mbuti.DG	0.227402	0.002553	799384
Uzbekistan_BA_Bustan	JPT.SG	Mbuti.DG	0.22819	0.002566	795573
Uzbekistan_BA_Bustan	TSI.SG	Mbuti.DG	0.254818	0.002553	822425
Uzbekistan_BA_Bustan	Jordanian.DG	Mbuti.DG	0.241902	0.002612	745883
Uzbekistan_BA_Bustan	Yakut.DG	Mbuti.DG	0.232055	0.002682	730046
Uzbekistan_BA_Bustan	Altaian.DG	Mbuti.DG	0.237679	0.0026	732843
Uzbekistan_BA_Bustan	Spanish.DG	Mbuti.DG	0.251885	0.002692	731886
Uzbekistan_BA_Bustan	Punjabi.DG	Mbuti.DG	0.24551	0.002593	757184
Uzbekistan_BA_Bustan	Naxi.DG	Mbuti.DG	0.225904	0.002612	743497
Uzbekistan_BA_Bustan	Adygei.DG	Mbuti.DG	0.257737	0.002688	730377
Uzbekistan_BA_Bustan	Irula.DG	Mbuti.DG	0.238163	0.002599	729176
Uzbekistan_BA_Bustan	French.DG	Mbuti.DG	0.256249	0.002652	747485
Uzbekistan_BA_Bustan	Italian_North.DG	Mbuti.DG	0.254773	0.002761	706612
Uzbekistan_BA_Bustan	Kalash.DG	Mbuti.DG	0.25512	0.002683	726506
Uzbekistan_BA_Bustan	Burusho.DG	Mbuti.DG	0.249299	0.002624	731313
Uzbekistan_BA_Bustan	BedouinB.DG	Mbuti.DG	0.240971	0.002593	726943
Uzbekistan_BA_Bustan	Jew_Iraqi.DG	Mbuti.DG	0.252664	0.00265	729653
Uzbekistan_BA_Bustan	Polish.DG	Mbuti.DG	0.252684	0.002763	707180
Uzbekistan_BA_Bustan	Daur.DG	Mbuti.DG	0.228306	0.002721	707949
Uzbekistan_BA_Bustan	Hazara.DG	Mbuti.DG	0.242593	0.002613	755240
Uzbekistan_BA_Bustan	Mongola.DG	Mbuti.DG	0.228393	0.002599	731309
Uzbekistan_BA_Bustan	Oroqen.DG	Mbuti.DG	0.228765	0.002668	729192
Uzbekistan_BA_Bustan	Itelmen.DG	Mbuti.DG	0.232335	0.002782	706633
Uzbekistan_BA_Bustan	Eskimo_Chaplin.DG	Mbuti.DG	0.23385	0.002731	706615
Uzbekistan_BA_Bustan	Druze.DG	Mbuti.DG	0.249801	0.002633	729813
Uzbekistan_BA_Bustan	Kusunda.DG	Mbuti.DG	0.228699	0.002645	725463
Uzbekistan_BA_Bustan	Relli.DG	Mbuti.DG	0.240078	0.002653	730774
Uzbekistan_BA_Bustan	Kapu.DG	Mbuti.DG	0.241977	0.002686	730821
Uzbekistan_BA_Bustan	Tuscan.DG	Mbuti.DG	0.253767	0.002672	731575
Uzbekistan_BA_Bustan	Sindhi.DG	Mbuti.DG	0.25135	0.002678	730031
Uzbekistan_BA_Bustan	Russian.DG	Mbuti.DG	0.253524	0.002631	732657
Uzbekistan_BA_Bustan	Hungarian.DG	Mbuti.DG	0.253711	0.002673	732236
Uzbekistan_BA_Bustan	Tajik.DG	Mbuti.DG	0.252814	0.002622	747840
Uzbekistan_BA_Bustan	Russia_Abkhasian.DG	Mbuti.DG	0.259065	0.002736	729797
Uzbekistan_BA_Bustan	Iranian.DG	Mbuti.DG	0.253583	0.002646	730182
Uzbekistan_BA_Bustan	Yadava.DG	Mbuti.DG	0.243913	0.002657	729478
Uzbekistan_BA_Bustan	Ami.DG	Mbuti.DG	0.227675	0.002646	727476
Uzbekistan_BA_Bustan	Cambodian.DG	Mbuti.DG	0.225381	0.002635	730991
Uzbekistan_BA_Bustan	Korean.DG	Mbuti.DG	0.227557	0.002636	730509
Uzbekistan_BA_Bustan	Dai.DG	Mbuti.DG	0.225659	0.002612	756890
Uzbekistan_BA_Bustan	Uyghur.DG	Mbuti.DG	0.242097	0.002563	756817
Uzbekistan_BA_Bustan	Eskimo_Sireniki.DG	Mbuti.DG	0.233038	0.002648	727065
Uzbekistan_BA_Bustan	Even.DG	Mbuti.DG	0.230952	0.002604	742949
Uzbekistan_BA_Bustan	Icelandic.DG	Mbuti.DG	0.255648	0.002679	732001
Uzbekistan_BA_Bustan	Thai.DG	Mbuti.DG	0.22624	0.002674	731297
Uzbekistan_BA_Bustan	Brahmin.DG	Mbuti.DG	0.247466	0.002624	730369
Uzbekistan_BA_Bustan	Madiga.DG	Mbuti.DG	0.241343	0.002608	730257
Uzbekistan_BA_Bustan	Finnish.DG	Mbuti.DG	0.254921	0.002615	747993
Uzbekistan_BA_Bustan	She.DG	Mbuti.DG	0.226543	0.002661	728130
Uzbekistan_BA_Bustan	Eskimo_Naukan.DG	Mbuti.DG	0.23278	0.002617	725049
Uzbekistan_BA_Bustan	Czech.DG	Mbuti.DG	0.256829	0.002756	707122
Uzbekistan_BA_Bustan	Bengali.DG	Mbuti.DG	0.242101	0.002666	731172
Uzbekistan_BA_Bustan	Lezgin.DG	Mbuti.DG	0.257707	0.002665	730574
Uzbekistan_BA_Bustan	Greek.DG	Mbuti.DG	0.257197	0.002638	730658
Uzbekistan_BA_Bustan	Yi.DG	Mbuti.DG	0.225971	0.00267	730664
Uzbekistan_BA_Bustan	Tujia.DG	Mbuti.DG	0.225912	0.002638	730006
Uzbekistan_BA_Bustan	Atayal.DG	Mbuti.DG	0.225722	0.002745	706554
Uzbekistan_BA_Bustan	English.DG	Mbuti.DG	0.256147	0.002713	732080
Uzbekistan_BA_Bustan	Tubalar.DG	Mbuti.DG	0.239226	0.002622	731866
Uzbekistan_BA_Bustan	Cretan.DG	Mbuti.DG	0.254541	0.002713	730644
Uzbekistan_BA_Bustan	Kinh.DG	Mbuti.DG	0.224951	0.002669	730375
Uzbekistan_BA_Bustan	Aleut.DG	Mbuti.DG	0.242785	0.002624	730968
Uzbekistan_BA_Bustan	Brahui.DG	Mbuti.DG	0.25101	0.002726	729884
Uzbekistan_BA_Bustan	Tu.DG	Mbuti.DG	0.226717	0.002603	731970
Uzbekistan_BA_Bustan	Pathan.DG	Mbuti.DG	0.254472	0.002664	730956
Uzbekistan_BA_Bustan	Sardinian.DG	Mbuti.DG	0.251963	0.00262	745724
Uzbekistan_BA_Bustan	Han.DG	Mbuti.DG	0.226189	0.002618	742989
Uzbekistan_BA_Bustan	Makrani.DG	Mbuti.DG	0.250201	0.002687	728914
Uzbekistan_BA_Bustan	Balochi.DG	Mbuti.DG	0.251962	0.002719	728952
Uzbekistan_BA_Bustan	Basque.DG	Mbuti.DG	0.253811	0.002682	731190
Uzbekistan_BA_Bustan	Miao.DG	Mbuti.DG	0.225684	0.002629	729478
Uzbekistan_BA_Bustan	Orcadian.DG	Mbuti.DG	0.255261	0.002685	732288
Uzbekistan_BA_Bustan	Armenian.DG	Mbuti.DG	0.257717	0.002645	730208
Uzbekistan_BA_Bustan	Mala.DG	Mbuti.DG	0.238173	0.002612	730462
Uzbekistan_BA_Bustan	Mansi.DG	Mbuti.DG	0.24362	0.002659	732448
Uzbekistan_BA_Bustan	Turkish.DG	Mbuti.DG	0.253391	0.002685	730932
Uzbekistan_BA_Bustan	Russia_NorthOssetian.DG	Mbuti.DG	0.256682	0.002642	731131
Uzbekistan_BA_Bustan	Palestinian.DG	Mbuti.DG	0.24305	0.002669	746520
Uzbekistan_BA_Bustan	Norwegian.DG	Mbuti.DG	0.254187	0.002731	707144
Uzbekistan_BA_Bustan	Kyrgyz_Kyrgyzstan.DG	Mbuti.DG	0.238453	0.002597	748731
Uzbekistan_BA_Bustan	Georgian.DG	Mbuti.DG	0.258123	0.002682	729616
Uzbekistan_BA_Bustan	Chechen.DG	Mbuti.DG	0.255938	0.002799	705787
Uzbekistan_BA_Bustan	Xibo.DG	Mbuti.DG	0.226539	0.002673	730598
Uzbekistan_BA_Bustan	Ulchi.DG	Mbuti.DG	0.22776	0.002689	728991
Uzbekistan_BA_Bustan	Saami.DG	Mbuti.DG	0.251197	0.002723	731368
Uzbekistan_BA_Bustan	Samaritan.DG	Mbuti.DG	0.249081	0.002771	700796
Uzbekistan_BA_Bustan	Hezhen.DG	Mbuti.DG	0.227414	0.002626	729776
Uzbekistan_BA_Bustan	Bulgarian.DG	Mbuti.DG	0.255062	0.002675	732045
Uzbekistan_BA_Bustan	Burmese.DG	Mbuti.DG	0.226479	0.002598	731917
Uzbekistan_BA_Bustan	Tlingit.DG	Mbuti.DG	0.2449	0.002628	732711
Uzbekistan_BA_Bustan	China_Lahu.DG	Mbuti.DG	0.225866	0.002642	728358
Uzbekistan_BA_Bustan	Bergamo.DG	Mbuti.DG	0.253888	0.002776	706918
Uzbekistan_BA_Bustan	Khonda_Dora.DG	Mbuti.DG	0.229936	0.002698	707162
Uzbekistan_BA_Bustan	Chukchi.DG	Mbuti.DG	0.243913	0.002785	709720
Uzbekistan_BA_Bustan	Japanese.DG	Mbuti.DG	0.226795	0.00261	742487
Uzbekistan_BA_Bustan	Albanian.DG	Mbuti.DG	0.255692	0.002793	707135
Uzbekistan_BA_Bustan	Estonian.DG	Mbuti.DG	0.255031	0.002659	732321
Uzbekistan_BA_Bustan	YRI.SG	Mbuti.DG	0.084253	0.001695	844407
Uzbekistan_BA_Bustan	Mongolia_lateMed_Mongol	Mbuti.DG	0.23406	0.002522	804152
Uzbekistan_BA_Bustan	Mongolia_Altai_MLBA	Mbuti.DG	0.246491	0.002539	725709
Uzbekistan_BA_Bustan	Mongolia_earlyXiongnu_west	Mbuti.DG	0.250905	0.002574	700963
Uzbekistan_BA_Bustan	Mongolia_lateXiongnu_han	Mbuti.DG	0.231925	0.002569	735638
Uzbekistan_BA_Bustan	Mongolia_IA_Ulaanzuukh_SlabGrave	Mbuti.DG	0.230256	0.002603	705490
Uzbekistan_BA_Bustan	Mongolia_lateXiongnu_sarmatian	Mbuti.DG	0.253898	0.002551	753077
Uzbekistan_BA_Bustan	Mongolia_lateXiongnu	Mbuti.DG	0.235023	0.00253	766598
Uzbekistan_BA_Bustan	Mongolia_Chandman_IA	Mbuti.DG	0.249319	0.002589	733928
Uzbekistan_BA_Bustan	Mongolia_centralMongolia_preBA	Mbuti.DG	0.230112	0.00292	303237
Uzbekistan_BA_Bustan	Russia_Fofonovo_EN	Mbuti.DG	0.228239	0.002696	573068
Uzbekistan_BA_Bustan	Mongolia_EMBA_Chemurchek_southAltai	Mbuti.DG	0.25665	0.002854	638902
Uzbekistan_BA_Bustan	Russia_lateXiongnu	Mbuti.DG	0.231212	0.002591	707151
Uzbekistan_BA_Bustan	Mongolia_lateMed_Mongol_o	Mbuti.DG	0.233042	0.003041	275061
Uzbekistan_BA_Bustan	Mongolia_EMBA_Chemurchek_northAlai	Mbuti.DG	0.233856	0.002729	668068
Uzbekistan_BA_Bustan	Mongolia_earlyMed_Turk	Mbuti.DG	0.240889	0.002591	730503
Uzbekistan_BA_Bustan	Mongolia_earlyMed_Uigur	Mbuti.DG	0.247693	0.002554	762840
Uzbekistan_BA_Bustan	Mongolia_earlyMed_Uigur_o	Mbuti.DG	0.235756	0.00289	476807
Uzbekistan_BA_Bustan	Russia_IA_Ulaanzuukh_SlabGrave	Mbuti.DG	0.228562	0.007285	11655
Uzbekistan_BA_Bustan	Mongolia_Afanasievo_Mongolia	Mbuti.DG	0.258822	0.002692	613407
Uzbekistan_BA_Bustan	Mongolia_lateMed_o	Mbuti.DG	0.235081	0.002724	603828
Uzbekistan_BA_Bustan	Mongolia_earlyXiongnu_rest	Mbuti.DG	0.236099	0.002665	661371
Uzbekistan_BA_Bustan	Mongolia_earlyXiongnu_o	Mbuti.DG	0.234453	0.002817	579592
Uzbekistan_BA_Bustan	Mongolia_eastMongolia_preBA	Mbuti.DG	0.227725	0.002829	426947
Uzbekistan_BA_Bustan	Mongolia_IA_o	Mbuti.DG	0.22921	0.003366	140967
Uzbekistan_BA_Bustan	Mongolia_earlyMed_o	Mbuti.DG	0.258395	0.002743	568312
Uzbekistan_BA_Bustan	Mongolia_earlyMed_Turk_o	Mbuti.DG	0.231437	0.002749	579167
Uzbekistan_BA_Bustan	Mongolia_MLBA_o	Mbuti.DG	0.242958	0.002612	613492
Uzbekistan_BA_Bustan	Mongolia_lateMed_Khitan	Mbuti.DG	0.231906	0.0027	636178
Uzbekistan_BA_Bustan	Mongolia_MLBA_Ulaanzuukh_SlabGrave	Mbuti.DG	0.229998	0.0026	725539
Uzbekistan_BA_Bustan	Mongolia_lateXiongnu_o	Mbuti.DG	0.229394	0.00276	596916
Uzbekistan_BA_Bustan	ULG75	Mbuti.DG	0.256805	0.003971	77857
Uzbekistan_BA_SappaliTepe	Anatolia_C	Mbuti.DG	0.259338	0.002839	444570
Uzbekistan_BA_SappaliTepe	Armenia_C	Mbuti.DG	0.25912	0.002629	793637
Uzbekistan_BA_SappaliTepe	Bulgaria_C	Mbuti.DG	0.255932	0.002586	807550
Uzbekistan_BA_SappaliTepe	Bulgaria_C_published	Mbuti.DG	0.256548	0.003692	75545
Uzbekistan_BA_SappaliTepe	Bulgaria_Varna_C	Mbuti.DG	0.254022	0.002842	351044
Uzbekistan_BA_SappaliTepe	Hungary_C_Balaton_Lasinja	Mbuti.DG	0.255364	0.002668	716427
Uzbekistan_BA_SappaliTepe	Hungary_C_Balaton_Lasinja_published	Mbuti.DG	0.252853	0.002811	638986
Uzbekistan_BA_SappaliTepe	Hungary_EarlyC_Tiszapolgar	Mbuti.DG	0.255339	0.002722	475002
Uzbekistan_BA_SappaliTepe	Hungary_EarlyC_Tiszapolgar_Bodrogkeresztur_published	Mbuti.DG	0.255973	0.00279	638638
Uzbekistan_BA_SappaliTepe	Hungary_LateC_Baden	Mbuti.DG	0.25673	0.002603	834262
Uzbekistan_BA_SappaliTepe	Hungary_LateC_Baden_published	Mbuti.DG	0.25655	0.002682	721712
Uzbekistan_BA_SappaliTepe	Hungary_LateC_Protoboleraz	Mbuti.DG	0.25351	0.002725	690923
Uzbekistan_BA_SappaliTepe	Hungary_LateC_Protoboleraz_published	Mbuti.DG	0.255827	0.00268	772900
Uzbekistan_BA_SappaliTepe	Iberia_C	Mbuti.DG	0.255358	0.002579	890272
Uzbekistan_BA_SappaliTepe	Iberia_C.SG	Mbuti.DG	0.250166	0.002611	875026
Uzbekistan_BA_SappaliTepe	Iberia_C_BA	Mbuti.DG	0.251852	0.002803	460517
Uzbekistan_BA_SappaliTepe	Iberia_C_BA_published	Mbuti.DG	0.258062	0.003863	72071
Uzbekistan_BA_SappaliTepe	Iberia_C_published	Mbuti.DG	0.253835	0.002747	603420
Uzbekistan_BA_SappaliTepe	Tajikistan_C_Sarazm	Mbuti.DG	0.265368	0.002655	663070
Uzbekistan_BA_SappaliTepe	Turkmenistan_C_Geoksyur	Mbuti.DG	0.266255	0.002583	790681
Uzbekistan_BA_SappaliTepe	Iran_C_HajjiFiruz	Mbuti.DG	0.259364	0.002653	787599
Uzbekistan_BA_SappaliTepe	Iran_C_SehGabi	Mbuti.DG	0.262078	0.002593	786077
Uzbekistan_BA_SappaliTepe	Iran_C_TepeHissar	Mbuti.DG	0.264502	0.002569	762623
Uzbekistan_BA_SappaliTepe	Iran_C_TepeHissar_published	Mbuti.DG	0.263373	0.003301	139479
Uzbekistan_BA_SappaliTepe	Israel_C	Mbuti.DG	0.252175	0.002549	827939
Uzbekistan_BA_SappaliTepe	Israel_C_published	Mbuti.DG	0.250824	0.002873	198853
Uzbekistan_BA_SappaliTepe	Italy_C.SG	Mbuti.DG	0.253272	0.00264	853556
Uzbekistan_BA_SappaliTepe	Italy_C_BA.SG	Mbuti.DG	0.253301	0.002556	851336
Uzbekistan_BA_SappaliTepe	Italy_North_Remedello_C.SG	Mbuti.DG	0.251244	0.002688	455470
Uzbekistan_BA_SappaliTepe	Italy_Sicily_C_o	Mbuti.DG	0.25647	0.004756	30973
Uzbekistan_BA_SappaliTepe	Romania_C	Mbuti.DG	0.254574	0.002636	669171
Uzbekistan_BA_SappaliTepe	Romania_C.SG	Mbuti.DG	0.249907	0.002776	826044
Uzbekistan_BA_SappaliTepe	Sweden_BAC	Mbuti.DG	0.254549	0.002775	744712
Uzbekistan_BA_SappaliTepe	Sweden_BattleAxe.SG	Mbuti.DG	0.249866	0.00275	453532
Uzbekistan_BA_SappaliTepe	Sweden_FBC	Mbuti.DG	0.253399	0.002833	438714
Uzbekistan_BA_SappaliTepe	Turkmenistan_C_Geoksyur_published	Mbuti.DG	0.261225	0.003389	96380
Uzbekistan_BA_SappaliTepe	Turkmenistan_C_Namazga.SG	Mbuti.DG	0.259696	0.002832	460702
Uzbekistan_BA_SappaliTepe	Turkmenistan_C_Namazga_o.SG	Mbuti.DG	0.257748	0.002994	314869
Uzbekistan_BA_SappaliTepe	Turkmenistan_C_Parkhai	Mbuti.DG	0.266347	0.002567	764810
Uzbekistan_BA_SappaliTepe	Turkmenistan_C_TepeAnau	Mbuti.DG	0.263659	0.00267	715115
Uzbekistan_BA_SappaliTepe	Wales_C	Mbuti.DG	0.253444	0.002896	403670
Uzbekistan_BA_SappaliTepe	Wales_C.SG	Mbuti.DG	0.252701	0.00284	399506
Uzbekistan_BA_SappaliTepe	Anatolia_EBA	Mbuti.DG	0.26036	0.002716	791665
Uzbekistan_BA_SappaliTepe	Anatolia_EBA.SG	Mbuti.DG	0.252378	0.002631	755771
Uzbekistan_BA_SappaliTepe	Armenia_Caucasus_EBA_KuraAraxes	Mbuti.DG	0.26047	0.002793	460378
Uzbekistan_BA_SappaliTepe	Armenia_EBA	Mbuti.DG	0.261532	0.002674	773908
Uzbekistan_BA_SappaliTepe	Bulgaria_BeliBreyag_EBA	Mbuti.DG	0.254487	0.002909	287308
Uzbekistan_BA_SappaliTepe	Bulgaria_EBA	Mbuti.DG	0.256797	0.002597	751565
Uzbekistan_BA_SappaliTepe	Bulgaria_EBA_Ezero	Mbuti.DG	0.261077	0.004052	51760
Uzbekistan_BA_SappaliTepe	Bulgaria_EBA_published	Mbuti.DG	0.254121	0.002802	474294
Uzbekistan_BA_SappaliTepe	Bulgaria_EBA_Yamnaya_o	Mbuti.DG	0.256119	0.002908	284206
Uzbekistan_BA_SappaliTepe	Croatia_LateC_EBA_Vucedol	Mbuti.DG	0.256375	0.002776	342289
Uzbekistan_BA_SappaliTepe	Croatia_MBA	Mbuti.DG	0.257549	0.002716	656991
Uzbekistan_BA_SappaliTepe	Czech_BA	Mbuti.DG	0.256142	0.00268	643600
Uzbekistan_BA_SappaliTepe	Czech_BellBeaker	Mbuti.DG	0.258567	0.002544	897411
Uzbekistan_BA_SappaliTepe	Czech_EBA	Mbuti.DG	0.25875	0.002572	821652
Uzbekistan_BA_SappaliTepe	Czech_EBA_Protounetice	Mbuti.DG	0.255765	0.003633	67648
Uzbekistan_BA_SappaliTepe	Czech_EBA_Unetice	Mbuti.DG	0.258066	0.0028	328039
Uzbekistan_BA_SappaliTepe	Denmark_BA.SG	Mbuti.DG	0.248715	0.003426	93391
Uzbekistan_BA_SappaliTepe	England_BellBeaker	Mbuti.DG	0.259131	0.002567	893697
Uzbekistan_BA_SappaliTepe	England_BellBeaker_published	Mbuti.DG	0.254164	0.003661	75886
Uzbekistan_BA_SappaliTepe	England_C_EBA	Mbuti.DG	0.257708	0.00255	857023
Uzbekistan_BA_SappaliTepe	England_C_EBA_published	Mbuti.DG	0.257269	0.003802	66356
Uzbekistan_BA_SappaliTepe	Estonia_BA.SG	Mbuti.DG	0.253329	0.00256	787026
Uzbekistan_BA_SappaliTepe	Estonia_BA_o.SG	Mbuti.DG	0.262081	0.007221	12411
Uzbekistan_BA_SappaliTepe	France_BellBeaker	Mbuti.DG	0.25656	0.002616	731643
Uzbekistan_BA_SappaliTepe	France_BellBeaker_lowSteppe	Mbuti.DG	0.255296	0.002757	567187
Uzbekistan_BA_SappaliTepe	France_BellBeaker_published	Mbuti.DG	0.25816	0.003586	85743
Uzbekistan_BA_SappaliTepe	Germany_BA.SG	Mbuti.DG	0.254201	0.003501	84711
Uzbekistan_BA_SappaliTepe	Germany_BellBeaker	Mbuti.DG	0.257654	0.002546	898355
Uzbekistan_BA_SappaliTepe	Germany_BellBeaker_published	Mbuti.DG	0.255051	0.002801	270737
Uzbekistan_BA_SappaliTepe	Germany_EBA_Unetice	Mbuti.DG	0.256804	0.002598	797303
Uzbekistan_BA_SappaliTepe	Germany_EBA_Unetice_published	Mbuti.DG	0.257392	0.002805	612345
Uzbekistan_BA_SappaliTepe	Germany_Lech_BellBeaker	Mbuti.DG	0.25538	0.002596	788215
Uzbekistan_BA_SappaliTepe	Germany_Lech_EBA	Mbuti.DG	0.257012	0.002559	867214
Uzbekistan_BA_SappaliTepe	Gibraltar_BA	Mbuti.DG	0.254856	0.002757	440396
Uzbekistan_BA_SappaliTepe	Greece_Crete_Armenoi	Mbuti.DG	0.257176	0.004737	35175
Uzbekistan_BA_SappaliTepe	Greece_Minoan_Lassithi	Mbuti.DG	0.255901	0.00262	772057
Uzbekistan_BA_SappaliTepe	Greece_Minoan_Odigitria	Mbuti.DG	0.256438	0.002964	203007
Uzbekistan_BA_SappaliTepe	Hungary_EBA_BellBeaker	Mbuti.DG	0.257674	0.002611	841558
Uzbekistan_BA_SappaliTepe	Hungary_EBA_BellBeaker_o	Mbuti.DG	0.25406	0.002727	655060
Uzbekistan_BA_SappaliTepe	Hungary_EBA_Mako	Mbuti.DG	0.255209	0.002799	611310
Uzbekistan_BA_SappaliTepe	Hungary_EBA_Protonagyrev	Mbuti.DG	0.255877	0.002742	613048
Uzbekistan_BA_SappaliTepe	Hungary_LC_EBA_Baden_Yamnaya	Mbuti.DG	0.254278	0.002642	670137
Uzbekistan_BA_SappaliTepe	Hungary_Maros_EBA.SG	Mbuti.DG	0.250304	0.002736	335488
Uzbekistan_BA_SappaliTepe	Kazakhstan_EBA_Yamnaya.SG	Mbuti.DG	0.259095	0.002797	847712
Uzbekistan_BA_SappaliTepe	Kazakhstan_Mereke_MBA	Mbuti.DG	0.257204	0.002607	738213
Uzbekistan_BA_SappaliTepe	Iberia_BA	Mbuti.DG	0.255693	0.002571	878392
Uzbekistan_BA_SappaliTepe	Iberia_BA.SG	Mbuti.DG	0.251738	0.002664	762285
Uzbekistan_BA_SappaliTepe	Iberia_BA_Cogotas	Mbuti.DG	0.255032	0.00277	407723
Uzbekistan_BA_SappaliTepe	Iberia_BA_published	Mbuti.DG	0.257387	0.002958	312206
Uzbekistan_BA_SappaliTepe	Iberia_BellBeaker	Mbuti.DG	0.25476	0.002597	847394
Uzbekistan_BA_SappaliTepe	Iberia_BellBeaker_o	Mbuti.DG	0.254964	0.00523	25307
Uzbekistan_BA_SappaliTepe	Iberia_BellBeaker_o_published	Mbuti.DG	0.218464	0.002887	524341
Uzbekistan_BA_SappaliTepe	Iberia_BellBeaker_published	Mbuti.DG	0.255724	0.00317	146020
Uzbekistan_BA_SappaliTepe	Iberia_EBA	Mbuti.DG	0.253433	0.002879	389911
Uzbekistan_BA_SappaliTepe	Iberia_North_BA_Africa_published	Mbuti.DG	0.247875	0.002825	279679
Uzbekistan_BA_SappaliTepe	Iran_BA_HajjiFiruz	Mbuti.DG	0.260115	0.002741	668140
Uzbekistan_BA_SappaliTepe	Iran_BA2_ShahrISokhta	Mbuti.DG	0.257119	0.002771	464871
Uzbekistan_BA_SappaliTepe	Iran_BA2_ShahrISokhta_published	Mbuti.DG	0.249345	0.002565	652635
Uzbekistan_BA_SappaliTepe	Ireland_BA.SG	Mbuti.DG	0.253806	0.002629	864424
Uzbekistan_BA_SappaliTepe	Italy_North_BellBeaker	Mbuti.DG	0.255736	0.002608	702057
Uzbekistan_BA_SappaliTepe	Italy_North_Remedello_EBA.SG	Mbuti.DG	0.251905	0.003221	145048
Uzbekistan_BA_SappaliTepe	Jordan_EBA	Mbuti.DG	0.252268	0.002593	680393
Uzbekistan_BA_SappaliTepe	Kazakhstan_BA_Zevakinskiy	Mbuti.DG	0.256683	0.002791	468538
Uzbekistan_BA_SappaliTepe	Kazakhstan_Botai.SG	Mbuti.DG	0.25013	0.002836	769890
Uzbekistan_BA_SappaliTepe	Kazakhstan_CentralSteppe_EMBA.SG	Mbuti.DG	0.243317	0.002635	859618
Uzbekistan_BA_SappaliTepe	Kazakhstan_Eneolithic_Botai.SG	Mbuti.DG	0.248657	0.002719	858653
Uzbekistan_BA_SappaliTepe	Kazakhstan_Georgievsky_MBA_published	Mbuti.DG	0.260514	0.002815	471476
Uzbekistan_BA_SappaliTepe	Kazakhstan_Chanchar_MBA_published	Mbuti.DG	0.257592	0.002726	564935
Uzbekistan_BA_SappaliTepe	Kazakhstan_Dali_EBA	Mbuti.DG	0.255304	0.002769	595190
Uzbekistan_BA_SappaliTepe	Russia_Afanasievo	Mbuti.DG	0.261016	0.002604	885552
Uzbekistan_BA_SappaliTepe	Russia_Afanasievo.SG	Mbuti.DG	0.25759	0.002691	659705
Uzbekistan_BA_SappaliTepe	Kazakhstan_Kanai_MBA	Mbuti.DG	0.25029	0.003267	104136
Uzbekistan_BA_SappaliTepe	Kazakhstan_Kumsay_EBA	Mbuti.DG	0.258845	0.00271	741632
Uzbekistan_BA_SappaliTepe	Russia_Caucasus_EBA_Yamnaya	Mbuti.DG	0.259051	0.002678	619462
Uzbekistan_BA_SappaliTepe	Russia_EBA_Yamnaya_Kalmykia.SG	Mbuti.DG	0.255677	0.00264	817268
Uzbekistan_BA_SappaliTepe	Russia_EBA_Yamnaya_Samara	Mbuti.DG	0.260273	0.002606	845592
Uzbekistan_BA_SappaliTepe	Russia_EBA_Yamnaya_Samara_published2	Mbuti.DG	0.259369	0.002786	808203
Uzbekistan_BA_SappaliTepe	Russia_Kalmykia_EBA_Yamnaya.SG	Mbuti.DG	0.256841	0.002851	347670
Uzbekistan_BA_SappaliTepe	Ukraine_BA_Catacomb.SG	Mbuti.DG	0.257532	0.003399	123970
Uzbekistan_BA_SappaliTepe	Ukraine_EBA_Yamnaya	Mbuti.DG	0.259881	0.002851	615633
Uzbekistan_BA_SappaliTepe	Ukraine_EBA_Yamnaya.SG	Mbuti.DG	0.25681	0.003513	100918
Uzbekistan_BA_SappaliTepe	Ukraine_EBA_Yamnaya_published	Mbuti.DG	0.25601	0.004634	35401
Uzbekistan_BA_SappaliTepe	Ukraine_Ozera_EBA_Yamnaya	Mbuti.DG	0.260028	0.002909	463136
Uzbekistan_BA_SappaliTepe	Latvia_BA	Mbuti.DG	0.25725	0.002558	835111
Uzbekistan_BA_SappaliTepe	Nepal_Chokhopani_2700BP.SG	Mbuti.DG	0.22408	0.002721	849600
Uzbekistan_BA_SappaliTepe	Nepal_Mebrak_2125BP.SG	Mbuti.DG	0.227068	0.002783	576975
Uzbekistan_BA_SappaliTepe	Netherlands_BA	Mbuti.DG	0.257452	0.002713	664446
Uzbekistan_BA_SappaliTepe	Netherlands_BellBeaker	Mbuti.DG	0.259104	0.002604	780760
Uzbekistan_BA_SappaliTepe	Netherlands_BellBeaker_published	Mbuti.DG	0.250805	0.00553	22454
Uzbekistan_BA_SappaliTepe	Poland_BellBeaker	Mbuti.DG	0.257897	0.002588	762528
Uzbekistan_BA_SappaliTepe	Poland_BellBeaker_published	Mbuti.DG	0.255835	0.003563	82134
Uzbekistan_BA_SappaliTepe	Poland_CWC_o.SG	Mbuti.DG	0.253953	0.002728	846369
Uzbekistan_BA_SappaliTepe	Poland_EBA	Mbuti.DG	0.257002	0.002786	605226
Uzbekistan_BA_SappaliTepe	Poland_EBA.SG	Mbuti.DG	0.25578	0.002768	776580
Uzbekistan_BA_SappaliTepe	Poland_Unetice_EBA.SG	Mbuti.DG	0.252056	0.002709	542845
Uzbekistan_BA_SappaliTepe	Russia_BA_Okunevo.SG	Mbuti.DG	0.243903	0.002561	891180
Uzbekistan_BA_SappaliTepe	Russia_Caucasus_KuraAraxes	Mbuti.DG	0.257587	0.002699	595880
Uzbekistan_BA_SappaliTepe	Russia_Caucasus_LateMaikop	Mbuti.DG	0.259957	0.002755	613676
Uzbekistan_BA_SappaliTepe	Russia_Caucasus_Maikop	Mbuti.DG	0.25948	0.002933	312548
Uzbekistan_BA_SappaliTepe	Russia_Caucasus_Maikop_Novosvobodnaya	Mbuti.DG	0.262827	0.002647	589979
Uzbekistan_BA_SappaliTepe	Russia_EBA.SG	Mbuti.DG	0.254998	0.003218	163654
Uzbekistan_BA_SappaliTepe	Russia_Kurma_EBA.SG	Mbuti.DG	0.231482	0.002719	508948
Uzbekistan_BA_SappaliTepe	Russia_Kurma_EBA_o.SG	Mbuti.DG	0.227867	0.00342	117213
Uzbekistan_BA_SappaliTepe	Russia_LateMaikop	Mbuti.DG	0.259917	0.002752	558392
Uzbekistan_BA_SappaliTepe	Russia_Shamanka_EBA.SG	Mbuti.DG	0.230351	0.002654	779825
Uzbekistan_BA_SappaliTepe	Russia_Steppe_Maikop	Mbuti.DG	0.258172	0.002618	766451
Uzbekistan_BA_SappaliTepe	Russia_Steppe_Maikop_o	Mbuti.DG	0.256556	0.002795	395208
Uzbekistan_BA_SappaliTepe	Russia_UstIda_EBA.SG	Mbuti.DG	0.231491	0.002682	637316
Uzbekistan_BA_SappaliTepe	Scotland_BellBeaker	Mbuti.DG	0.256401	0.002633	638938
Uzbekistan_BA_SappaliTepe	Scotland_C_EBA	Mbuti.DG	0.257127	0.002584	731565
Uzbekistan_BA_SappaliTepe	Scotland_C_EBA_published	Mbuti.DG	0.257269	0.002828	479788
Uzbekistan_BA_SappaliTepe	Switzerland_BellBeaker	Mbuti.DG	0.256058	0.002867	208625
Uzbekistan_BA_SappaliTepe	Iran_BA1_ShahrISokhta	Mbuti.DG	0.263355	0.002597	727806
Uzbekistan_BA_SappaliTepe	Iran_BA3_ShahrISokhta	Mbuti.DG	0.25728	0.003942	54546
Uzbekistan_BA_SappaliTepe	Tajikistan_BA_DashtiKozy	Mbuti.DG	0.258126	0.002676	747605
Uzbekistan_BA_SappaliTepe	Turkmenistan_EBA_Parkhai	Mbuti.DG	0.265413	0.002832	658907
Uzbekistan_BA_SappaliTepe	Turkmenistan_Gonur_BA_1	Mbuti.DG	0.26481	0.002581	735438
Uzbekistan_BA_SappaliTepe	Turkmenistan_Gonur_BA_1_o	Mbuti.DG	0.2606	0.003109	184193
Uzbekistan_BA_SappaliTepe	Turkmenistan_Gonur_BA_1_o2	Mbuti.DG	0.253436	0.004012	44651
Uzbekistan_BA_SappaliTepe	Turkmenistan_Gonur_BA_3	Mbuti.DG	0.26717	0.003626	83907
Uzbekistan_BA_SappaliTepe	Turkmenistan_Gonur_BA_2	Mbuti.DG	0.258889	0.002981	242714
Uzbekistan_BA_SappaliTepe	Turkmenistan_Gonur_BA_2_published	Mbuti.DG	0.252855	0.003158	165712
Uzbekistan_BA_SappaliTepe	Turkmenistan_Gonur_BA_4	Mbuti.DG	0.263338	0.003708	81732
Uzbekistan_BA_SappaliTepe	Turkmenistan_Gonur_BA_published	Mbuti.DG	0.268939	0.016799	2230
Uzbekistan_BA_SappaliTepe	Uzbekistan_BA_Bustan	Mbuti.DG	0.264154	0.00262	747197
Uzbekistan_BA_SappaliTepe	Uzbekistan_BA_Bustan_o1	Mbuti.DG	0.260971	0.002825	524536
Uzbekistan_BA_SappaliTepe	Uzbekistan_BA_Bustan_o2	Mbuti.DG	0.2535	0.002783	588784
Uzbekistan_BA_SappaliTepe	Uzbekistan_BA_Dzharkutan1	Mbuti.DG	0.264772	0.002619	813775
[truncated: 2,572 more rows]
